# Supplementary material for: Evaluation of Inbred Maize (Zea mays L.) for Tolerance to Low Phosphorus at the Seedling Stage
Source: MDPI journal article supplement (doi:10.3390/plants12132520), 2023-06-30
Supplement: s1 [file s1]

**Table S1.** 550 maize inbreds used in the current study

| Seed ID  | Acc       | Gen | trt. | rep | SL    | RL    | SFW  | RFW  | SDW  | RDW  | RSR  | TDM  |
|----------|-----------|-----|------|-----|-------|-------|------|------|------|------|------|------|
| 11JY1255 | C5 RIL 2  | 1   | LP   | 1   | 35.52 | 49.31 | 3.27 | 3.53 | 0.43 | 0.26 | 1.39 | 0.69 |
| 11JY1256 | C5 RIL 3  | 2   | LP   | 1   | 38.19 | 60.98 | 2.78 | 2.43 | 0.45 | 0.20 | 1.60 | 0.64 |
| 11JY1258 | C5 RIL 5  | 3   | LP   | 1   | 29.19 | 41.31 | 2.33 | 1.76 | 0.33 | 0.14 | 1.42 | 0.47 |
| 11JY1259 | C5 RIL 6  | 4   | LP   | 1   | 40.19 | 46.31 | 3.12 | 2.15 | 0.47 | 0.19 | 1.15 | 0.66 |
| 11JY1262 | C5 RIL 10 | 5   | LP   | 1   | 29.52 | 44.31 | 1.71 | 1.81 | 0.26 | 0.14 | 1.50 | 0.39 |
| 11JY1263 | C5 RIL 11 | 6   | LP   | 1   | 40.19 | 48.64 | 3.24 | 2.97 | 0.43 | 0.22 | 1.21 | 0.65 |
| 11JY1264 | C5 RIL 12 | 7   | LP   | 1   | 35.86 | 62.98 | 2.84 | 2.91 | 0.36 | 0.20 | 1.76 | 0.56 |
| 11JY1267 | C5 RIL 17 | 8   | LP   | 1   | 33.86 | 45.98 | 3.56 | 2.74 | 0.47 | 0.20 | 1.36 | 0.66 |
| 11JY1268 | C5 RIL 18 | 9   | LP   | 1   | 34.52 | 47.31 | 3.60 | 3.15 | 0.46 | 0.21 | 1.37 | 0.67 |
| 11JY1269 | C5 RIL 19 | 10  | LP   | 1   | 39.86 | 46.31 | 4.39 | 3.76 | 0.53 | 0.28 | 1.16 | 0.81 |
| 11JY1271 | C5 RIL 21 | 11  | LP   | 1   | 35.86 | 51.31 | 3.34 | 3.13 | 0.48 | 0.26 | 1.43 | 0.73 |
| 11JY1272 | C5 RIL 24 | 12  | LP   | 1   | 29.19 | 37.64 | 2.37 | 2.26 | 0.34 | 0.18 | 1.29 | 0.51 |
| 11JY1274 | C5 RIL 26 | 13  | LP   | 1   | 36.86 | 52.98 | 3.45 | 2.70 | 0.46 | 0.20 | 1.44 | 0.66 |
| 11JY1275 | C5 RIL 27 | 14  | LP   | 1   | 32.19 | 40.64 | 2.15 | 2.28 | 0.36 | 0.16 | 1.26 | 0.52 |
| 11JY1276 | C5 RIL 28 | 15  | LP   | 1   | 32.86 | 35.98 | 2.20 | 1.27 | 0.32 | 0.11 | 1.09 | 0.44 |
| 11JY1278 | C5 RIL 30 | 16  | LP   | 1   | 30.19 | 51.64 | 2.65 | 2.83 | 0.41 | 0.25 | 1.71 | 0.66 |
| 11JY1279 | C5 RIL 31 | 17  | LP   | 1   | 31.86 | 55.31 | 3.71 | 3.23 | 0.50 | 0.24 | 1.74 | 0.74 |
| 11JY1280 | C5 RIL 32 | 18  | LP   | 1   | 36.19 | 43.31 | 3.29 | 3.04 | 0.50 | 0.24 | 1.20 | 0.74 |
| 11JY1281 | C5 RIL 34 | 19  | LP   | 1   | 28.19 | 38.98 | 2.82 | 2.65 | 0.38 | 0.19 | 1.38 | 0.57 |
| 11JY1282 | C5 RIL 36 | 20  | LP   | 1   | 34.58 | 36.81 | 2.83 | 2.13 | 0.30 | 0.14 | 1.06 | 0.44 |
| 11JY1283 | C5 RIL 38 | 21  | LP   | 1   | 34.91 | 38.81 | 3.73 | 3.72 | 0.42 | 0.23 | 1.11 | 0.65 |
| 11JY1284 | C5 RIL 39 | 22  | LP   | 1   | 35.91 | 40.14 | 3.06 | 2.13 | 0.44 | 0.16 | 1.12 | 0.60 |
| 11JY1285 | C5 RIL 40 | 23  | LP   | 1   | 38.91 | 44.81 | 4.25 | 3.50 | 0.54 | 0.25 | 1.15 | 0.79 |
| 11JY1286 | C5 RIL 41 | 24  | LP   | 1   | 36.24 | 28.14 | 3.30 | 2.16 | 0.41 | 0.19 | 0.78 | 0.60 |
| 11JY1287 | C5 RIL 42 | 25  | LP   | 1   | 31.58 | 48.81 | 2.26 | 2.21 | 0.30 | 0.16 | 1.55 | 0.46 |
| 11JY1288 | C5 RIL 44 | 26  | LP   | 1   | 33.24 | 40.81 | 1.31 | 1.82 | 0.39 | 0.10 | 1.23 | 0.48 |
| 11JY1289 | C5 RIL 45 | 27  | LP   | 1   | 32.58 | 35.48 | 2.20 | 1.85 | 0.33 | 0.14 | 1.09 | 0.47 |
| 11JY1290 | C5 RIL 46 | 28  | LP   | 1   | 34.58 | 49.14 | 2.43 | 2.28 | 0.33 | 0.17 | 1.42 | 0.50 |
| 11JY1292 | C5 RIL 48 | 29  | LP   | 1   | 43.58 | 53.48 | 5.53 | 4.86 | 0.59 | 0.33 | 1.23 | 0.92 |
| 11JY1293 | C5 RIL 49 | 30  | LP   | 1   | 44.91 | 54.48 | 4.14 | 3.61 | 0.54 | 0.26 | 1.21 | 0.80 |
| 11JY1299 | C5 RIL 57 | 31  | LP   | 1   | 34.91 | 40.81 | 2.93 | 3.27 | 0.44 | 0.22 | 1.17 | 0.66 |
| 11JY1301 | C5 RIL 59 | 32  | LP   | 1   | 28.91 | 40.48 | 1.55 | 1.83 | 0.25 | 0.12 | 1.40 | 0.37 |
| 11JY1305 | C5 RIL 64 | 33  | LP   | 1   | 34.91 | 61.14 | 2.94 | 3.30 | 0.43 | 0.24 | 1.75 | 0.67 |
| 11JY1310 | C5 RIL 68 | 34  | LP   | 1   | 36.24 | 55.81 | 3.35 | 3.28 | 0.42 | 0.24 | 1.54 | 0.66 |
| 11JY1312 | C5 RIL 70 | 35  | LP   | 1   | 34.10 | 46.11 | 2.33 | 1.62 | 0.28 | 0.16 | 1.35 | 0.43 |

| Seed ID  | Acc        | Gen | trt. | rep | SL    | RL    | SFW  | RFW  | SDW  | RDW  | RSR  | TDM  |
|----------|------------|-----|------|-----|-------|-------|------|------|------|------|------|------|
| 11JY1315 | C5 RIL 82  | 36  | LP   | 1   | 34.10 | 36.44 | 3.16 | 1.54 | 0.35 | 0.16 | 1.07 | 0.52 |
| 11JY1316 | C5 RIL 74  | 37  | LP   | 1   | 26.44 | 44.11 | 1.87 | 2.02 | 0.28 | 0.20 | 1.67 | 0.48 |
| 11JY1318 | C5 RIL 78  | 38  | LP   | 1   | 37.44 | 51.44 | 3.66 | 2.99 | 0.40 | 0.22 | 1.37 | 0.62 |
| 11JY1319 | C5 RIL 79  | 39  | LP   | 1   | 32.10 | 50.78 | 1.51 | 1.46 | 0.21 | 0.13 | 1.58 | 0.34 |
| 11JY1320 | C5 RIL 80  | 40  | LP   | 1   | 32.77 | 50.11 | 1.71 | 2.38 | 0.25 | 0.19 | 1.53 | 0.43 |
| 11JY1323 | C5 RIL 84  | 41  | LP   | 1   | 36.10 | 46.78 | 2.89 | 2.13 | 0.37 | 0.21 | 1.30 | 0.58 |
| 11JY1324 | C5 RIL 86  | 42  | LP   | 1   | 37.44 | 52.11 | 4.22 | 3.01 | 0.41 | 0.25 | 1.39 | 0.66 |
| 11JY1326 | C5 RIL 88  | 43  | LP   | 1   | 31.44 | 50.78 | 1.90 | 2.29 | 0.29 | 0.20 | 1.62 | 0.48 |
| 11JY1327 | C5 RIL 89  | 44  | LP   | 1   | 33.44 | 42.11 | 1.58 | 1.12 | 0.31 | 0.17 | 1.26 | 0.48 |
| 11JY1328 | C5 RIL 90  | 45  | LP   | 1   | 30.10 | 37.11 | 1.77 | 1.29 | 0.28 | 0.16 | 1.23 | 0.44 |
| 11JY1329 | C5 RIL 92  | 46  | LP   | 1   | 37.77 | 48.28 | 3.88 | 2.17 | 0.43 | 0.21 | 1.28 | 0.64 |
| 11JY1333 | C5 RIL 96  | 47  | LP   | 1   | 43.10 | 53.44 | 4.45 | 3.64 | 0.54 | 0.31 | 1.24 | 0.85 |
| 11JY1334 | C5 RIL 99  | 48  | LP   | 1   | 39.10 | 60.78 | 5.40 | 4.01 | 0.61 | 0.32 | 1.55 | 0.93 |
| 11JY1336 | C5 RIL 102 | 49  | LP   | 1   | 31.44 | 40.44 | 1.85 | 1.77 | 0.30 | 0.18 | 1.29 | 0.48 |
| 11JY1337 | C5 RIL 103 | 50  | LP   | 1   | 33.77 | 46.78 | 3.89 | 2.35 | 0.46 | 0.21 | 1.39 | 0.67 |
| 11JY1339 | C5 RIL 106 | 51  | LP   | 1   | 37.10 | 44.78 | 4.28 | 3.32 | 0.49 | 0.29 | 1.21 | 0.78 |
| 11JY1341 | C5 RIL 108 | 52  | LP   | 1   | 30.24 | 52.23 | 1.93 | 2.88 | 0.27 | 0.18 | 1.73 | 0.45 |
| 11JY1349 | C5 RIL 119 | 53  | LP   | 1   | 33.74 | 41.73 | 1.91 | 1.88 | 0.23 | 0.11 | 1.24 | 0.35 |
| 11JY1350 | C5 RIL 120 | 54  | LP   | 1   | 30.74 | 45.23 | 2.43 | 2.05 | 0.27 | 0.14 | 1.47 | 0.41 |
| 11JY1351 | C5 RIL 121 | 55  | LP   | 1   | 28.24 | 42.23 | 2.61 | 2.50 | 0.26 | 0.14 | 1.50 | 0.40 |
| 11JY1352 | C5 RIL 122 | 56  | LP   | 1   | 37.24 | 47.39 | 3.35 | 1.99 | 0.59 | 0.37 | 1.27 | 0.96 |
| 11JY1354 | C5 RIL 124 | 57  | LP   | 1   | 42.58 | 45.06 | 3.41 | 1.91 | 0.40 | 0.18 | 1.06 | 0.58 |
| 11JY1356 | C5 RIL 126 | 58  | LP   | 1   | 34.74 | 48.23 | 3.18 | 2.09 | 0.31 | 0.17 | 1.39 | 0.48 |
| 11JY1357 | C5 RIL 128 | 59  | LP   | 1   | 35.58 | 51.73 | 3.37 | 1.77 | 0.41 | 0.20 | 1.45 | 0.61 |
| 11JY1360 | C5 RIL 131 | 60  | LP   | 1   | 31.24 | 55.73 | 2.63 | 2.06 | 0.33 | 0.18 | 1.78 | 0.52 |
| 11JY1362 | C5 RIL 133 | 61  | LP   | 1   | 35.91 | 47.39 | 3.83 | 2.38 | 0.44 | 0.20 | 1.32 | 0.64 |
| 11JY1363 | C5 RIL 134 | 62  | LP   | 1   | 37.24 | 61.06 | 3.40 | 2.07 | 0.38 | 0.19 | 1.64 | 0.57 |
| 11JY1364 | C5 RIL 135 | 63  | LP   | 1   | 35.58 | 44.39 | 3.93 | 2.60 | 0.43 | 0.18 | 1.25 | 0.61 |
| 11JY1365 | C5 RIL 137 | 64  | LP   | 1   | 32.24 | 50.23 | 2.72 | 2.19 | 0.31 | 0.14 | 1.56 | 0.45 |
| 11JY1366 | C5 RIL 138 | 65  | LP   | 1   | 32.24 | 61.06 | 2.89 | 2.13 | 0.36 | 0.19 | 1.89 | 0.54 |
| 11JY1367 | C5 RIL 139 | 66  | LP   | 1   | 37.74 | 52.73 | 2.86 | 2.12 | 0.32 | 0.19 | 1.40 | 0.51 |
| 11JY1368 | C5 RIL 140 | 67  | LP   | 1   | 31.91 | 39.39 | 2.46 | 1.56 | 0.25 | 0.11 | 1.23 | 0.36 |
| 11JY1369 | C5 RIL 141 | 68  | LP   | 1   | 35.91 | 51.06 | 3.74 | 2.54 | 0.41 | 0.17 | 1.42 | 0.57 |
| 11JY1370 | C5 RIL 142 | 69  | LP   | 1   | 31.24 | 32.73 | 2.42 | 1.19 | 0.24 | 0.11 | 1.05 | 0.35 |
| 11JY1372 | C5 RIL 144 | 70  | LP   | 1   | 37.58 | 65.06 | 4.66 | 3.99 | 0.54 | 0.28 | 1.73 | 0.82 |
| 11JY1374 | C5 RIL 146 | 71  | LP   | 1   | 33.41 | 61.81 | 2.99 | 3.53 | 0.30 | 0.24 | 1.85 | 0.54 |

| Seed ID  | Acc        | Gen | trt. | rep | SL    | RL    | SFW  | RFW  | SDW  | RDW  | RSR  | TDM  |
|----------|------------|-----|------|-----|-------|-------|------|------|------|------|------|------|
| 11JY1376 | C5 RIL 150 | 72  | LP   | 1   | 34.74 | 65.81 | 3.11 | 3.37 | 0.28 | 0.22 | 1.89 | 0.51 |
| 11JY1377 | C5 RIL 151 | 73  | LP   | 1   | 35.80 | 54.95 | 1.70 | 1.32 | 0.18 | 0.15 | 1.53 | 0.33 |
| 11JY1378 | C5 RIL 152 | 74  | LP   | 1   | 33.55 | 49.20 | 1.85 | 1.63 | 0.20 | 0.18 | 1.47 | 0.38 |
| 11JY1379 | C5 RIL 153 | 75  | LP   | 1   | 35.80 | 45.60 | 2.09 | 1.86 | 0.25 | 0.17 | 1.27 | 0.42 |
| 11JY1382 | C5 RIL 156 | 76  | LP   | 1   | 35.30 | 41.65 | 1.92 | 0.98 | 0.23 | 0.14 | 1.18 | 0.37 |
| 11JY1383 | C5 RIL 157 | 77  | LP   | 1   | 36.53 | 43.13 | 2.31 | 1.15 | 0.23 | 0.13 | 1.18 | 0.36 |
| 11JY1384 | C5 RIL 158 | 78  | LP   | 1   | 35.33 | 60.33 | 2.64 | 2.05 | 0.30 | 0.20 | 1.71 | 0.50 |
| 11JY1385 | C5 RIL 159 | 79  | LP   | 1   | 27.27 | 39.20 | 1.21 | 0.72 | 0.13 | 0.09 | 1.44 | 0.22 |
| 11JY1387 | C5 RIL 161 | 80  | LP   | 1   | 35.77 | 47.20 | 2.24 | 1.35 | 0.20 | 0.13 | 1.32 | 0.33 |
| 11JY1388 | C5 RIL 162 | 81  | LP   | 1   | 37.45 | 45.10 | 1.64 | 1.40 | 0.17 | 0.14 | 1.20 | 0.31 |
| 11JY1389 | C5 RIL 163 | 82  | LP   | 1   | 44.05 | 53.10 | 3.26 | 2.59 | 0.32 | 0.30 | 1.21 | 0.62 |
| 11JY1391 | C5 RIL 165 | 83  | LP   | 1   | 40.00 | 41.20 | 2.53 | 1.40 | 0.29 | 0.20 | 1.03 | 0.49 |
| 11JY1394 | C5 RIL 169 | 84  | LP   | 1   | 31.80 | 40.00 | 1.26 | 0.60 | 0.15 | 0.12 | 1.26 | 0.27 |
| 11JY1396 | C5 RIL 171 | 85  | LP   | 1   | 41.60 | 44.10 | 3.54 | 2.36 | 0.34 | 0.23 | 1.06 | 0.57 |
| 11JY1397 | C5 RIL 172 | 86  | LP   | 1   | 32.50 | 45.73 | 1.78 | 1.20 | 0.16 | 0.12 | 1.41 | 0.28 |
| 11JY1399 | C5 RIL 174 | 87  | LP   | 1   | 36.40 | 35.20 | 3.46 | 1.95 | 0.38 | 0.32 | 0.97 | 0.70 |
| 11JY1400 | C5 RIL 176 | 88  | LP   | 1   | 38.50 | 40.67 | 3.05 | 2.25 | 0.34 | 0.25 | 1.06 | 0.59 |
| 11JY1401 | C5 RIL 177 | 89  | LP   | 1   | 37.65 | 50.80 | 3.51 | 2.78 | 0.36 | 0.27 | 1.35 | 0.63 |
| 11JY1402 | C5 RIL 178 | 90  | LP   | 1   | 34.50 | 42.60 | 2.42 | 2.26 | 0.31 | 0.20 | 1.23 | 0.51 |
| 11JY1404 | C5 RIL 182 | 91  | LP   | 1   | 30.30 | 39.60 | 2.37 | 1.86 | 0.26 | 0.25 | 1.31 | 0.51 |
| 11JY1405 | C5 RIL 183 | 92  | LP   | 1   | 32.33 | 37.03 | 2.62 | 2.07 | 0.29 | 0.22 | 1.15 | 0.51 |
| 11JY1406 | C5 RIL 184 | 93  | LP   | 1   | 29.80 | 54.15 | 1.57 | 1.28 | 0.20 | 0.14 | 1.82 | 0.34 |
| 11JY1409 | C5 RIL 187 | 94  | LP   | 1   | 29.00 | 37.70 | 1.75 | 1.93 | 0.22 | 0.20 | 1.30 | 0.42 |
| 11JY1410 | C5 RIL 188 | 95  | LP   | 1   | 29.35 | 37.10 | 1.84 | 1.57 | 0.20 | 0.17 | 1.26 | 0.37 |
| 11JY1412 | C5 RIL 191 | 96  | LP   | 1   | 38.33 | 71.00 | 4.03 | 3.30 | 0.46 | 0.33 | 1.85 | 0.79 |
| 11JY1413 | C5 RIL 192 | 97  | LP   | 1   | 31.70 | 44.45 | 1.78 | 1.24 | 0.23 | 0.17 | 1.40 | 0.40 |
| 11JY1414 | C5 RIL 193 | 98  | LP   | 1   | 33.30 | 44.95 | 2.13 | 1.59 | 0.26 | 0.22 | 1.35 | 0.48 |
| 11JY1416 | C5 RIL 195 | 99  | LP   | 1   | 28.00 | 32.30 | 2.00 | 1.08 | 0.27 | 0.23 | 1.15 | 0.50 |
| 11JY1418 | C5 RIL 198 | 100 | LP   | 1   | 27.40 | 51.60 | 1.82 | 1.78 | 0.30 | 0.26 | 1.88 | 0.56 |
| 11JY1420 | C5 RIL 200 | 101 | LP   | 1   | 32.00 | 32.90 | 2.50 | 1.90 | 0.28 | 0.20 | 1.03 | 0.48 |
| 11JY1421 | C5 RIL 203 | 102 | LP   | 1   | 32.75 | 44.80 | 2.15 | 1.82 | 0.23 | 0.17 | 1.37 | 0.40 |
| 11JY1422 | C5 RIL 204 | 103 | LP   | 1   | 33.60 | 43.75 | 2.37 | 2.20 | 0.26 | 0.20 | 1.30 | 0.46 |
| 11JY1423 | C5 RIL 205 | 104 | LP   | 1   | 32.75 | 58.85 | 1.92 | 1.19 | 0.30 | 0.24 | 1.80 | 0.54 |
| 11JY1424 | C5 RIL 206 | 105 | LP   | 1   | 38.87 | 58.67 | 2.87 | 2.77 | 0.26 | 0.21 | 1.51 | 0.47 |
| 11JY1425 | C5 RIL 207 | 106 | LP   | 1   | 30.40 | 40.70 | 2.21 | 1.99 | 0.40 | 0.38 | 1.34 | 0.78 |
| 11JY1426 | C5 RIL 208 | 107 | LP   | 1   | 43.60 | 47.40 | 3.64 | 2.26 | 0.42 | 0.40 | 1.09 | 0.82 |

| Seed ID  | Acc        | Gen | trt. | rep | SL    | RL    | SFW  | RFW  | SDW  | RDW  | RSR  | TDM  |
|----------|------------|-----|------|-----|-------|-------|------|------|------|------|------|------|
| 11JY1428 | C5 RIL 210 | 108 | LP   | 1   | 30.65 | 47.60 | 2.53 | 1.68 | 0.28 | 0.21 | 1.55 | 0.49 |
| 11JY1429 | C5 RIL 211 | 109 | LP   | 1   | 29.99 | 45.39 | 2.03 | 2.38 | 0.37 | 0.26 | 1.51 | 0.63 |
| 11JY1429 | C5 RIL 211 | 110 | LP   | 1   | 33.60 | 39.65 | 2.14 | 1.67 | 0.23 | 0.17 | 1.18 | 0.40 |
| 11JY1431 | C5 RIL 214 | 111 | LP   | 1   | 29.45 | 49.40 | 2.27 | 2.44 | 0.25 | 0.20 | 1.68 | 0.45 |
| 11JY1433 | C5 RIL 216 | 112 | LP   | 1   | 27.25 | 33.60 | 1.31 | 0.62 | 0.17 | 0.14 | 1.23 | 0.31 |
| 11JY1434 | C5 RIL 217 | 113 | LP   | 1   | 38.30 | 37.50 | 4.41 | 1.95 | 0.48 | 0.42 | 0.98 | 0.90 |
| 11JY1435 | C5 RIL 218 | 114 | LP   | 1   | 31.40 | 63.50 | 2.64 | 2.49 | 0.30 | 0.21 | 2.02 | 0.51 |
| 11JY1437 | C5 RIL 220 | 115 | LP   | 1   | 32.95 | 52.35 | 2.13 | 2.22 | 0.22 | 0.22 | 1.59 | 0.44 |
| 11JY1440 | C5 RIL 225 | 116 | LP   | 1   | 32.17 | 55.00 | 2.46 | 2.57 | 0.26 | 0.21 | 1.71 | 0.47 |
| 11JY1442 | C5 RIL 227 | 117 | LP   | 1   | 30.93 | 44.27 | 2.32 | 2.33 | 0.25 | 0.18 | 1.43 | 0.43 |
| 11JY1444 | C5 RIL 229 | 118 | LP   | 1   | 40.30 | 60.10 | 3.41 | 2.80 | 0.33 | 0.24 | 1.49 | 0.57 |
| 11JY1454 | C5 RIL 240 | 119 | LP   | 1   | 32.45 | 45.90 | 3.00 | 2.29 | 0.30 | 0.24 | 1.41 | 0.54 |
| 11JY1455 | C5 RIL 241 | 120 | LP   | 1   | 29.50 | 41.00 | 1.25 | 1.46 | 0.30 | 0.13 | 1.39 | 0.43 |
| 11JY1456 | C5 RIL 243 | 121 | LP   | 1   | 29.80 | 40.33 | 1.85 | 1.76 | 0.24 | 0.17 | 1.35 | 0.41 |
| 11JY1459 | C5 RIL P2  | 122 | LP   | 1   | 35.15 | 53.50 | 3.44 | 1.55 | 0.34 | 0.26 | 1.52 | 0.60 |
| 11JY1460 | C5 RIL P1  | 123 | LP   | 1   | 31.80 | 37.50 | 1.15 | 0.47 | 0.12 | 0.10 | 1.18 | 0.22 |
| 11JY1461 | C6 RIL 3   | 124 | LP   | 1   | 40.60 | 31.80 | 2.44 | 1.61 | 0.26 | 0.10 | 0.78 | 0.36 |
| 11JY1462 | C6 RIL 14  | 125 | LP   | 1   | 49.87 | 60.10 | 5.93 | 2.67 | 0.32 | 0.15 | 1.21 | 0.47 |
| 11JY1463 | C6 RIL 23  | 126 | LP   | 1   | 33.00 | 35.00 | 1.53 | 1.43 | 0.18 | 0.13 | 1.06 | 0.31 |
| 11JY1464 | C6 RIL 24  | 127 | LP   | 1   | 37.00 | 40.00 | 2.64 | 2.14 | 0.32 | 0.22 | 1.08 | 0.54 |
| 11JY1465 | C6 RIL 25  | 128 | LP   | 1   | 44.67 | 63.67 | 3.52 | 3.49 | 0.39 | 0.29 | 1.43 | 0.68 |
| 11JY1466 | C6 RIL 29  | 129 | LP   | 1   | 29.00 | 33.00 | 1.58 | 1.80 | 0.21 | 0.16 | 1.14 | 0.37 |
| 11JY1468 | C6 RIL 144 | 130 | LP   | 1   | 33.00 | 39.00 | 1.46 | 1.40 | 0.19 | 0.17 | 1.18 | 0.36 |
| 11JY1469 | C6 RIL 203 | 131 | LP   | 1   | 42.33 | 53.00 | 3.43 | 3.37 | 0.38 | 0.26 | 1.25 | 0.64 |
| 11JY1470 | C6 RIL 212 | 132 | LP   | 1   | 36.33 | 36.33 | 2.15 | 1.03 | 0.24 | 0.11 | 1.00 | 0.35 |
| 11JY1472 | C6 RIL 219 | 133 | LP   | 1   | 28.00 | 30.00 | 1.36 | 1.29 | 0.15 | 0.10 | 1.07 | 0.25 |
| 11JY1473 | C6 RIL 239 | 134 | LP   | 1   | 33.87 | 42.27 | 2.37 | 1.93 | 0.26 | 0.15 | 1.25 | 0.41 |
| 11JY1474 | C6 RIL 243 | 135 | LP   | 1   | 43.60 | 47.43 | 4.21 | 3.63 | 0.49 | 0.33 | 1.09 | 0.82 |
| 11JY1475 | C6 RIL 272 | 136 | LP   | 1   | 48.20 | 51.73 | 5.66 | 2.16 | 0.44 | 0.12 | 1.07 | 0.56 |
| 11JY1476 | C6 RIL 273 | 137 | LP   | 1   | 40.07 | 42.13 | 3.17 | 2.04 | 0.40 | 0.28 | 1.05 | 0.68 |
| 11JY1477 | C6 RIL 283 | 138 | LP   | 1   | 39.97 | 42.33 | 2.43 | 1.78 | 0.32 | 0.20 | 1.06 | 0.52 |
| 11JY1478 | C6 RIL 293 | 139 | LP   | 1   | 40.63 | 36.60 | 3.09 | 1.72 | 0.43 | 0.31 | 0.90 | 0.74 |
| 11JY1479 | C6 RIL 298 | 140 | LP   | 1   | 35.70 | 29.80 | 2.96 | 0.90 | 0.42 | 0.22 | 0.83 | 0.64 |
| 11JY1480 | C6 RIL 303 | 141 | LP   | 1   | 39.67 | 21.67 | 2.61 | 1.08 | 0.31 | 0.19 | 0.55 | 0.50 |
| 11JY1481 | C6 RIL 327 | 142 | LP   | 1   | 28.15 | 33.85 | 1.36 | 1.16 | 0.17 | 0.14 | 1.20 | 0.31 |
| 11JY1482 | C6 RIL 341 | 143 | LP   | 1   | 31.45 | 24.90 | 2.12 | 1.81 | 0.26 | 0.18 | 0.79 | 0.44 |

| Seed ID  | Acc        | Gen | trt. | rep | SL    | RL    | SFW  | RFW  | SDW  | RDW  | RSR  | TDM  |
|----------|------------|-----|------|-----|-------|-------|------|------|------|------|------|------|
| 11JY1483 | C6 RIL 348 | 144 | LP   | 1   | 19.80 | 34.70 | 1.14 | 1.05 | 0.16 | 0.13 | 1.75 | 0.29 |
| 11JY1484 | C6 RIL 402 | 145 | LP   | 1   | 41.55 | 34.60 | 4.34 | 3.39 | 0.44 | 0.34 | 0.83 | 0.78 |
| 11JY1485 | C6 RIL 403 | 146 | LP   | 1   | 32.83 | 31.67 | 2.18 | 1.37 | 0.23 | 0.15 | 0.96 | 0.38 |
| 11JY1487 | C6 RIL 5   | 147 | LP   | 1   | 48.67 | 22.23 | 3.49 | 0.49 | 0.31 | 0.09 | 0.46 | 0.40 |
| 11JY1488 | C6 RIL 7   | 148 | LP   | 1   | 41.40 | 49.50 | 4.92 | 3.11 | 0.51 | 0.41 | 1.20 | 0.92 |
| 11JY1489 | C6 RIL 10  | 149 | LP   | 1   | 40.20 | 45.70 | 3.78 | 2.39 | 0.44 | 0.34 | 1.14 | 0.78 |
| 11JY1490 | C6 RIL 15  | 150 | LP   | 1   | 45.90 | 49.10 | 4.61 | 4.03 | 0.50 | 0.36 | 1.07 | 0.86 |
| 11JY1491 | C6 RIL 19  | 151 | LP   | 1   | 40.43 | 46.90 | 2.98 | 3.24 | 0.35 | 0.26 | 1.16 | 0.61 |
| 11JY1493 | C6 RIL 21  | 152 | LP   | 1   | 39.83 | 44.77 | 3.30 | 3.09 | 0.35 | 0.27 | 1.12 | 0.62 |
| 11JY1494 | C6 RIL 23  | 153 | LP   | 1   | 45.50 | 55.60 | 3.32 | 3.83 | 0.37 | 0.33 | 1.22 | 0.70 |
| 11JY1495 | C6 RIL 24  | 154 | LP   | 1   | 39.60 | 37.30 | 3.17 | 2.95 | 0.37 | 0.28 | 0.94 | 0.65 |
| 11JY1496 | C6 RIL 25  | 155 | LP   | 1   | 37.50 | 38.87 | 2.21 | 2.52 | 0.30 | 0.21 | 1.04 | 0.51 |
| 11JY1497 | C6 RIL 28  | 156 | LP   | 1   | 26.00 | 28.50 | 1.00 | 0.59 | 0.11 | 0.08 | 1.10 | 0.19 |
| 11JY1498 | C6 RIL 29  | 157 | LP   | 1   | 43.43 | 52.60 | 4.17 | 4.45 | 0.46 | 0.32 | 1.21 | 0.78 |
| 11JY1499 | C6 RIL 30  | 158 | LP   | 1   | 42.85 | 32.07 | 3.72 | 2.09 | 0.42 | 0.16 | 0.75 | 0.58 |
| 11JY1500 | C6 RIL 31  | 159 | LP   | 1   | 35.93 | 38.73 | 2.54 | 1.98 | 0.33 | 0.26 | 1.08 | 0.59 |
| 11JY1501 | C6 RIL 32  | 160 | LP   | 1   | 42.07 | 49.83 | 2.67 | 1.89 | 0.34 | 0.22 | 1.18 | 0.56 |
| 11JY1502 | C6 RIL 33  | 161 | LP   | 1   | 35.10 | 29.20 | 2.40 | 1.17 | 0.31 | 0.17 | 0.83 | 0.48 |
| 11JY1503 | C6 RIL 36  | 162 | LP   | 1   | 43.90 | 32.33 | 2.71 | 3.17 | 0.24 | 0.21 | 0.74 | 0.45 |
| 11JY1504 | C6 RIL 39  | 163 | LP   | 1   | 36.03 | 44.37 | 2.76 | 1.88 | 0.34 | 0.26 | 1.23 | 0.60 |
| 11JY1505 | C6 RIL 40  | 164 | LP   | 1   | 36.60 | 39.60 | 2.63 | 1.63 | 0.29 | 0.21 | 1.08 | 0.50 |
| 11JY1506 | C6 RIL 42  | 165 | LP   | 1   | 36.80 | 34.23 | 2.96 | 2.48 | 0.31 | 0.21 | 0.93 | 0.52 |
| 11JY1508 | C6 RIL 47  | 166 | LP   | 1   | 39.40 | 47.40 | 2.79 | 1.77 | 0.34 | 0.19 | 1.20 | 0.53 |
| 11JY1509 | C6 RIL 49  | 167 | LP   | 1   | 29.80 | 32.50 | 1.75 | 1.00 | 0.21 | 0.13 | 1.09 | 0.34 |
| 11JY1510 | C6 RIL 50  | 168 | LP   | 1   | 33.53 | 44.07 | 2.48 | 1.78 | 0.27 | 0.22 | 1.31 | 0.49 |
| 11JY1511 | C6 RIL 52  | 169 | LP   | 1   | 38.77 | 25.47 | 2.78 | 2.02 | 0.28 | 0.15 | 0.66 | 0.43 |
| 11JY1512 | C6 RIL 53  | 170 | LP   | 1   | 39.05 | 45.35 | 2.85 | 1.59 | 0.31 | 0.17 | 1.16 | 0.48 |
| 11JY1513 | C6 RIL 57  | 171 | LP   | 1   | 33.25 | 38.75 | 2.14 | 1.33 | 0.24 | 0.16 | 1.17 | 0.40 |
| 11JY1514 | C6 RIL 58  | 172 | LP   | 1   | 53.60 | 25.60 | 6.93 | 4.52 | 0.84 | 0.50 | 0.48 | 1.34 |
| 11JY1515 | C6 RIL 59  | 173 | LP   | 1   | 34.70 | 39.70 | 1.93 | 1.09 | 0.24 | 0.14 | 1.14 | 0.38 |
| 11JY1516 | C6 RIL 60  | 174 | LP   | 1   | 31.00 | 46.05 | 1.62 | 1.46 | 0.22 | 0.18 | 1.49 | 0.40 |
| 11JY1517 | C6 RIL 64  | 175 | LP   | 1   | 37.73 | 34.67 | 2.17 | 1.25 | 0.24 | 0.16 | 0.92 | 0.40 |
| 11JY1518 | C6 RIL 65  | 176 | LP   | 1   | 37.30 | 49.07 | 2.30 | 1.71 | 0.30 | 0.22 | 1.32 | 0.52 |
| 11JY1519 | C6 RIL 66  | 177 | LP   | 1   | 28.95 | 38.90 | 1.42 | 1.22 | 0.19 | 0.16 | 1.34 | 0.35 |
| 11JY1520 | C6 RIL 68  | 178 | LP   | 1   | 23.15 | 29.50 | 0.67 | 0.28 | 0.13 | 0.08 | 1.27 | 0.21 |
| 11JY1521 | C6 RIL 69  | 179 | LP   | 1   | 29.57 | 36.37 | 1.57 | 1.02 | 0.20 | 0.15 | 1.23 | 0.35 |

| Seed ID  | Acc        | Gen | trt. | rep | SL    | RL    | SFW  | RFW  | SDW  | RDW  | RSR  | TDM  |
|----------|------------|-----|------|-----|-------|-------|------|------|------|------|------|------|
| 11JY1522 | C6 RIL 70  | 180 | LP   | 1   | 36.73 | 41.47 | 3.12 | 2.41 | 0.23 | 0.13 | 1.13 | 0.36 |
| 11JY1523 | C6 RIL 72  | 181 | LP   | 1   | 36.40 | 38.50 | 1.80 | 1.43 | 0.23 | 0.17 | 1.06 | 0.40 |
| 11JY1524 | C6 RIL 74  | 182 | LP   | 1   | 40.83 | 39.53 | 2.25 | 1.77 | 0.29 | 0.23 | 0.97 | 0.52 |
| 11JY1525 | C6 RIL 76  | 183 | LP   | 1   | 36.95 | 48.00 | 2.51 | 1.52 | 0.35 | 0.24 | 1.30 | 0.59 |
| 11JY1527 | C6 RIL 79  | 184 | LP   | 1   | 32.10 | 39.00 | 2.14 | 1.67 | 0.29 | 0.23 | 1.21 | 0.52 |
| 11JY1528 | C6 RIL 83  | 185 | LP   | 1   | 37.80 | 28.00 | 2.33 | 1.51 | 0.24 | 0.17 | 0.74 | 0.41 |
| 11JY1529 | C6 RIL 85  | 186 | LP   | 1   | 34.17 | 31.47 | 1.80 | 0.81 | 0.23 | 0.15 | 0.92 | 0.38 |
| 11JY1530 | C6 RIL 86  | 187 | LP   | 1   | 24.00 | 15.83 | 0.73 | 0.32 | 0.13 | 0.08 | 0.66 | 0.21 |
| 11JY1531 | C6 RIL 91  | 188 | LP   | 1   | 39.47 | 24.37 | 2.84 | 1.74 | 0.41 | 0.29 | 0.62 | 0.70 |
| 11JY1532 | C6 RIL 94  | 189 | LP   | 1   | 42.20 | 39.93 | 2.93 | 0.63 | 0.32 | 0.14 | 0.95 | 0.46 |
| 11JY1533 | C6 RIL 95  | 190 | LP   | 1   | 37.40 | 46.67 | 1.99 | 0.73 | 0.27 | 0.19 | 1.25 | 0.46 |
| 11JY1534 | C6 RIL 97  | 191 | LP   | 1   | 37.37 | 55.87 | 4.19 | 3.18 | 0.32 | 0.23 | 1.50 | 0.55 |
| 11JY1535 | C6 RIL 103 | 192 | LP   | 1   | 37.80 | 57.05 | 1.84 | 0.70 | 0.23 | 0.15 | 1.51 | 0.38 |
| 11JY1536 | C6 RIL 104 | 193 | LP   | 1   | 29.45 | 36.25 | 1.38 | 0.49 | 0.17 | 0.09 | 1.23 | 0.26 |
| 11JY1537 | C6 RIL 107 | 194 | LP   | 1   | 38.27 | 36.53 | 1.97 | 0.72 | 0.27 | 0.18 | 0.95 | 0.45 |
| 11JY1538 | C6 RIL 108 | 195 | LP   | 1   | 45.57 | 29.50 | 2.87 | 0.79 | 0.38 | 0.20 | 0.65 | 0.58 |
| 11JY1539 | C6 RIL 109 | 196 | LP   | 1   | 46.65 | 30.50 | 1.88 | 0.90 | 0.25 | 0.15 | 0.65 | 0.40 |
| 11JY1540 | C6 RIL 112 | 197 | LP   | 1   | 30.10 | 30.17 | 1.20 | 0.49 | 0.15 | 0.11 | 1.00 | 0.26 |
| 11JY1541 | C6 RIL 113 | 198 | LP   | 1   | 45.50 | 37.17 | 3.52 | 2.00 | 0.36 | 0.29 | 0.82 | 0.65 |
| 11JY1542 | C6 RIL 115 | 199 | LP   | 1   | 41.57 | 24.67 | 2.33 | 1.02 | 0.31 | 0.18 | 0.59 | 0.49 |
| 11JY1543 | C6 RIL 116 | 200 | LP   | 1   | 44.73 | 49.90 | 2.18 | 0.60 | 0.27 | 0.15 | 1.12 | 0.42 |
| 11JY1544 | C6 RIL 117 | 201 | LP   | 1   | 42.40 | 48.80 | 2.13 | 0.85 | 0.23 | 0.17 | 1.15 | 0.40 |
| 11JY1545 | C6 RIL 120 | 202 | LP   | 1   | 50.45 | 59.45 | 4.26 | 2.53 | 0.38 | 0.19 | 1.18 | 0.57 |
| 11JY1546 | C6 RIL 121 | 203 | LP   | 1   | 40.50 | 31.43 | 1.97 | 0.61 | 0.30 | 0.18 | 0.78 | 0.48 |
| 11JY1547 | C6 RIL 123 | 204 | LP   | 1   | 42.57 | 37.67 | 2.66 | 0.97 | 0.36 | 0.22 | 0.88 | 0.58 |
| 11JY1548 | C6 RIL 124 | 205 | LP   | 1   | 37.30 | 29.37 | 1.23 | 0.35 | 0.21 | 0.12 | 0.79 | 0.33 |
| 11JY1549 | C6 RIL 127 | 206 | LP   | 1   | 40.73 | 50.73 | 3.08 | 1.72 | 0.35 | 0.18 | 1.25 | 0.53 |
| 11JY1550 | C6 RIL 131 | 207 | LP   | 1   | 31.30 | 40.20 | 1.30 | 0.51 | 0.17 | 0.13 | 1.28 | 0.30 |
| 11JY1551 | C6 RIL 134 | 208 | LP   | 1   | 48.85 | 37.65 | 2.97 | 1.45 | 0.29 | 0.18 | 0.77 | 0.47 |
| 11JY1552 | C6 RIL 135 | 209 | LP   | 1   | 46.60 | 53.40 | 3.26 | 1.74 | 0.39 | 0.23 | 1.15 | 0.62 |
| 11JY1553 | C6 RIL 138 | 210 | LP   | 1   | 45.63 | 47.40 | 3.22 | 1.18 | 0.41 | 0.22 | 1.04 | 0.63 |
| 11JY1554 | C6 RIL 139 | 211 | LP   | 1   | 33.00 | 39.90 | 1.72 | 1.12 | 0.19 | 0.15 | 1.21 | 0.34 |
| 11JY1555 | C6 RIL 140 | 212 | LP   | 1   | 23.00 | 30.20 | 0.64 | 0.27 | 0.09 | 0.05 | 1.31 | 0.14 |
| 11JY1556 | C6 RIL 141 | 213 | LP   | 1   | 44.00 | 50.87 | 3.84 | 1.84 | 0.34 | 0.45 | 1.16 | 0.79 |
| 11JY1557 | C6 RIL 142 | 214 | LP   | 1   | 47.13 | 50.27 | 4.20 | 2.36 | 0.49 | 0.33 | 1.07 | 0.82 |
| 11JY1558 | C6 RIL 143 | 215 | LP   | 1   | 36.20 | 49.30 | 1.81 | 1.45 | 0.20 | 0.12 | 1.36 | 0.32 |

| Seed ID  | Acc        | Gen | trt. | rep | SL    | RL    | SFW  | RFW  | SDW  | RDW  | RSR  | TDM  |
|----------|------------|-----|------|-----|-------|-------|------|------|------|------|------|------|
| 11JY1560 | C6 RIL 146 | 216 | LP   | 1   | 43.53 | 41.17 | 2.63 | 1.65 | 0.25 | 0.14 | 0.95 | 0.39 |
| 11JY1561 | C6 RIL 147 | 217 | LP   | 1   | 21.20 | 25.50 | 0.71 | 0.50 | 0.07 | 0.06 | 1.20 | 0.13 |
| 11JY1562 | C6 RIL 148 | 218 | LP   | 1   | 33.35 | 41.80 | 2.06 | 1.94 | 0.21 | 0.17 | 1.25 | 0.38 |
| 11JY1563 | C6 RIL 150 | 219 | LP   | 1   | 24.10 | 29.50 | 1.23 | 1.15 | 0.12 | 0.09 | 1.22 | 0.21 |
| 11JY1565 | C6 RIL 153 | 220 | LP   | 1   | 40.55 | 45.20 | 3.97 | 3.31 | 0.45 | 0.26 | 1.11 | 0.71 |
| 11JY1566 | C6 RIL 156 | 221 | LP   | 1   | 40.50 | 60.30 | 2.64 | 2.93 | 0.36 | 0.32 | 1.49 | 0.68 |
| 11JY1567 | C6 RIL 160 | 222 | LP   | 1   | 43.47 | 36.97 | 3.07 | 1.01 | 0.33 | 0.16 | 0.85 | 0.49 |
| 11JY1568 | C6 RIL 161 | 223 | LP   | 1   | 37.73 | 44.07 | 2.20 | 1.35 | 0.23 | 0.17 | 1.17 | 0.40 |
| 11JY1569 | C6 RIL 162 | 224 | LP   | 1   | 56.10 | 34.48 | 5.51 | 4.36 | 0.56 | 0.33 | 0.61 | 0.89 |
| 11JY1570 | C6 RIL 163 | 225 | LP   | 1   | 35.63 | 40.43 | 1.97 | 1.11 | 0.23 | 0.17 | 1.13 | 0.40 |
| 11JY1571 | C6 RIL 164 | 226 | LP   | 1   | 36.55 | 35.10 | 1.84 | 0.69 | 0.23 | 0.12 | 0.96 | 0.35 |
| 11JY1572 | C6 RIL 169 | 227 | LP   | 1   | 40.10 | 35.87 | 2.11 | 0.86 | 0.26 | 0.14 | 0.89 | 0.40 |
| 11JY1573 | C6 RIL 171 | 228 | LP   | 1   | 45.80 | 31.05 | 2.75 | 1.48 | 0.34 | 0.18 | 0.68 | 0.52 |
| 11JY1574 | C6 RIL 172 | 229 | LP   | 1   | 38.00 | 40.85 | 2.12 | 1.46 | 0.29 | 0.25 | 1.08 | 0.54 |
| 11JY1576 | C6 RIL 174 | 230 | LP   | 1   | 49.50 | 42.70 | 2.67 | 0.92 | 0.33 | 0.17 | 0.86 | 0.50 |
| 11JY1577 | C6 RIL 175 | 231 | LP   | 1   | 30.50 | 35.20 | 1.48 | 0.72 | 0.17 | 0.10 | 1.15 | 0.27 |
| 11JY1578 | C6 RIL 176 | 232 | LP   | 1   | 45.40 | 48.60 | 2.75 | 2.01 | 0.27 | 0.27 | 1.07 | 0.54 |
| 11JY1579 | C6 RIL 179 | 233 | LP   | 1   | 36.80 | 32.70 | 1.69 | 0.76 | 0.20 | 0.14 | 0.89 | 0.34 |
| 11JY1580 | C6 RIL 181 | 234 | LP   | 1   | 37.10 | 28.05 | 1.89 | 0.58 | 0.24 | 0.13 | 0.76 | 0.37 |
| 11JY1581 | C6 RIL 184 | 235 | LP   | 1   | 33.40 | 27.30 | 2.70 | 1.41 | 0.08 | 0.04 | 0.82 | 0.12 |
| 11JY1582 | C6 RIL 186 | 236 | LP   | 1   | 38.80 | 35.83 | 3.82 | 3.54 | 0.40 | 0.26 | 0.92 | 0.66 |
| 11JY1583 | C6 RIL 187 | 237 | LP   | 1   | 29.63 | 39.75 | 1.38 | 0.46 | 0.18 | 0.13 | 1.34 | 0.31 |
| 11JY1584 | C6 RIL 188 | 238 | LP   | 1   | 36.33 | 48.67 | 2.14 | 0.66 | 0.26 | 0.15 | 1.34 | 0.41 |
| 11JY1585 | C6 RIL 189 | 239 | LP   | 1   | 21.10 | 25.50 | 0.82 | 0.49 | 0.13 | 0.10 | 1.21 | 0.23 |
| 11JY1586 | C6 RIL 190 | 240 | LP   | 1   | 46.60 | 37.77 | 3.49 | 1.17 | 0.29 | 0.16 | 0.81 | 0.45 |
| 11JY1587 | C6 RIL 192 | 241 | LP   | 1   | 39.25 | 30.70 | 2.08 | 0.67 | 0.22 | 0.15 | 0.78 | 0.37 |
| 11JY1588 | C6 RIL 193 | 242 | LP   | 1   | 43.70 | 46.47 | 2.73 | 0.76 | 0.31 | 0.21 | 1.06 | 0.52 |
| 11JY1589 | C6 RIL 203 | 243 | LP   | 1   | 47.53 | 52.27 | 2.79 | 0.76 | 0.28 | 0.17 | 1.10 | 0.45 |
| 11JY1590 | C6 RIL 204 | 244 | LP   | 1   | 42.63 | 46.73 | 2.12 | 0.68 | 0.27 | 0.18 | 1.10 | 0.45 |
| 11JY1591 | C6 RIL 205 | 245 | LP   | 1   | 33.15 | 34.60 | 1.04 | 0.24 | 0.14 | 0.10 | 1.04 | 0.24 |
| 11JY1592 | C6 RIL 206 | 246 | LP   | 1   | 42.20 | 50.25 | 1.96 | 0.82 | 0.21 | 0.14 | 1.19 | 0.35 |
| 11JY1593 | C6 RIL 207 | 247 | LP   | 1   | 36.10 | 44.37 | 3.30 | 2.45 | 0.35 | 0.17 | 1.23 | 0.52 |
| 11JY1594 | C6 RIL 211 | 248 | LP   | 1   | 35.80 | 25.10 | 1.41 | 0.76 | 0.17 | 0.12 | 0.70 | 0.29 |
| 11JY1595 | C6 RIL 212 | 249 | LP   | 1   | 41.93 | 43.27 | 2.49 | 1.17 | 0.25 | 0.15 | 1.03 | 0.40 |
| 11JY1596 | C6 RIL 217 | 250 | LP   | 1   | 36.00 | 24.20 | 1.52 | 0.50 | 0.18 | 0.11 | 0.67 | 0.29 |
| 11JY1597 | C6 RIL 218 | 251 | LP   | 1   | 43.55 | 35.75 | 2.55 | 0.88 | 0.23 | 0.12 | 0.82 | 0.35 |

| Seed ID  | Acc        | Gen | trt. | rep | SL    | RL    | SFW  | RFW  | SDW  | RDW  | RSR  | TDM  |
|----------|------------|-----|------|-----|-------|-------|------|------|------|------|------|------|
| 11JY1598 | C6 RIL 219 | 252 | LP   | 1   | 53.90 | 49.10 | 4.63 | 1.57 | 0.45 | 0.19 | 0.91 | 0.64 |
| 11JY1599 | C6 RIL 220 | 253 | LP   | 1   | 37.55 | 48.35 | 2.33 | 0.82 | 0.30 | 0.24 | 1.29 | 0.54 |
| 11JY1600 | C6 RIL 225 | 254 | LP   | 1   | 42.67 | 33.80 | 3.53 | 2.21 | 0.34 | 0.18 | 0.79 | 0.52 |
| 11JY1601 | C6 RIL 230 | 255 | LP   | 1   | 37.97 | 57.67 | 2.52 | 2.36 | 0.28 | 0.21 | 1.52 | 0.49 |
| 11JY1602 | C6 RIL 231 | 256 | LP   | 1   | 48.90 | 32.37 | 3.96 | 2.99 | 0.31 | 0.22 | 0.66 | 0.53 |
| 11JY1603 | C6 RIL 232 | 257 | LP   | 1   | 46.13 | 44.03 | 3.34 | 2.50 | 0.37 | 0.22 | 0.95 | 0.59 |
| 11JY1604 | C6 RIL 234 | 258 | LP   | 1   | 42.03 | 64.20 | 3.24 | 3.69 | 0.37 | 0.26 | 1.53 | 0.63 |
| 11JY1605 | C6 RIL 235 | 259 | LP   | 1   | 44.07 | 51.30 | 3.00 | 3.17 | 0.34 | 0.22 | 1.16 | 0.56 |
| 11JY1606 | C6 RIL 236 | 260 | LP   | 1   | 35.00 | 32.43 | 2.82 | 2.54 | 0.31 | 0.19 | 0.93 | 0.50 |
| 11JY1607 | C6 RIL 238 | 261 | LP   | 1   | 42.53 | 40.73 | 3.96 | 2.76 | 0.41 | 0.23 | 0.96 | 0.64 |
| 11JY1608 | C6 RIL 239 | 262 | LP   | 1   | 39.65 | 31.10 | 1.68 | 1.00 | 0.17 | 0.07 | 0.78 | 0.24 |
| 11JY1609 | C6 RIL 241 | 263 | LP   | 1   | 45.83 | 59.30 | 3.02 | 3.14 | 0.34 | 0.24 | 1.29 | 0.58 |
| 11JY1610 | C6 RIL 243 | 264 | LP   | 1   | 49.93 | 77.77 | 4.66 | 4.75 | 0.48 | 0.36 | 1.56 | 0.84 |
| 11JY1611 | C6 RIL 245 | 265 | LP   | 1   | 34.50 | 35.27 | 2.22 | 1.41 | 0.25 | 0.10 | 1.02 | 0.35 |
| 11JY1612 | C6 RIL 249 | 266 | LP   | 1   | 42.37 | 39.70 | 3.31 | 1.97 | 0.36 | 0.16 | 0.94 | 0.52 |
| 11JY1613 | C6 RIL 253 | 267 | LP   | 1   | 47.37 | 55.67 | 4.39 | 3.26 | 0.47 | 0.25 | 1.18 | 0.72 |
| 11JY1614 | C6 RIL 258 | 268 | LP   | 1   | 40.25 | 43.60 | 2.77 | 1.89 | 0.30 | 0.16 | 1.08 | 0.46 |
| 11JY1616 | C6 RIL 261 | 269 | LP   | 1   | 47.67 | 40.70 | 5.50 | 3.35 | 0.53 | 0.25 | 0.85 | 0.78 |
| 11JY1617 | C6 RIL 262 | 270 | LP   | 1   | 37.67 | 24.03 | 2.43 | 1.38 | 0.32 | 0.15 | 0.64 | 0.47 |
| 11JY1619 | C6 RIL 265 | 271 | LP   | 1   | 48.47 | 47.77 | 4.29 | 2.70 | 0.47 | 0.23 | 0.99 | 0.70 |
| 11JY1620 | C6 RIL 267 | 272 | LP   | 1   | 41.27 | 45.07 | 3.51 | 2.11 | 0.34 | 0.15 | 1.09 | 0.49 |
| 11JY1621 | C6 RIL 268 | 273 | LP   | 1   | 46.47 | 36.90 | 4.26 | 3.25 | 0.40 | 0.23 | 0.79 | 0.63 |
| 11JY1622 | C6 RIL 270 | 274 | LP   | 1   | 42.43 | 41.83 | 2.81 | 2.58 | 0.32 | 0.21 | 0.99 | 0.53 |
| 11JY1623 | C6 RIL 272 | 275 | LP   | 1   | 43.60 | 53.73 | 3.21 | 2.49 | 0.34 | 0.21 | 1.23 | 0.55 |
| 11JY1624 | C6 RIL 273 | 276 | LP   | 1   | 40.90 | 44.83 | 3.36 | 1.71 | 0.32 | 0.13 | 1.10 | 0.45 |
| 11JY1625 | C6 RIL 275 | 277 | LP   | 1   | 44.07 | 31.17 | 4.59 | 2.79 | 0.45 | 0.25 | 0.71 | 0.70 |
| 11JY1626 | C6 RIL 276 | 278 | LP   | 1   | 39.30 | 37.60 | 3.10 | 2.63 | 0.37 | 0.23 | 0.96 | 0.60 |
| 11JY1627 | C6 RIL 282 | 279 | LP   | 1   | 49.13 | 44.77 | 5.02 | 3.31 | 0.61 | 0.32 | 0.91 | 0.93 |
| 11JY1628 | C6 RIL 283 | 280 | LP   | 1   | 52.37 | 46.37 | 4.31 | 3.71 | 0.51 | 0.28 | 0.89 | 0.79 |
| 11JY1629 | C6 RIL 284 | 281 | LP   | 1   | 48.50 | 36.70 | 4.91 | 3.30 | 0.46 | 0.25 | 0.76 | 0.71 |
| 11JY1630 | C6 RIL 286 | 282 | LP   | 1   | 32.53 | 36.20 | 2.09 | 2.10 | 0.26 | 0.17 | 1.11 | 0.43 |
| 11JY1631 | C6 RIL 287 | 283 | LP   | 1   | 40.53 | 45.07 | 2.90 | 2.74 | 0.35 | 0.22 | 1.11 | 0.57 |
| 11JY1632 | C6 RIL 288 | 284 | LP   | 1   | 29.50 | 24.20 | 1.45 | 0.66 | 0.11 | 0.05 | 0.82 | 0.16 |
| 11JY1633 | C6 RIL 289 | 285 | LP   | 1   | 44.83 | 41.87 | 3.73 | 2.40 | 0.40 | 0.21 | 0.93 | 0.61 |
| 11JY1634 | C6 RIL 291 | 286 | LP   | 1   | 43.93 | 52.90 | 3.06 | 2.31 | 0.35 | 0.18 | 1.20 | 0.53 |
| 11JY1635 | C6 RIL 292 | 287 | LP   | 1   | 32.30 | 10.30 | 1.43 | 1.18 | 0.20 | 0.13 | 0.32 | 0.33 |



| Seed ID  | Acc        | Gen | trt. | rep | SL    | RL    | SFW  | RFW  | SDW  | RDW  | RSR  | TDM  |
|----------|------------|-----|------|-----|-------|-------|------|------|------|------|------|------|
| 11JY1636 | C6 RIL 293 | 288 | LP   | 1   | 50.80 | 57.57 | 4.22 | 3.35 | 0.50 | 0.29 | 1.13 | 0.79 |
| 11JY1637 | C6 RIL 295 | 289 | LP   | 1   | 42.50 | 32.15 | 3.87 | 1.90 | 0.41 | 0.19 | 0.76 | 0.60 |
| 11JY1638 | C6 RIL 297 | 290 | LP   | 1   | 44.43 | 32.10 | 3.42 | 2.22 | 0.37 | 0.20 | 0.72 | 0.57 |
| 11JY1639 | C6 RIL 298 | 291 | LP   | 1   | 34.27 | 36.07 | 2.67 | 1.95 | 0.27 | 0.14 | 1.05 | 0.41 |
| 11JY1640 | C6 RIL 300 | 292 | LP   | 1   | 40.13 | 33.37 | 3.44 | 1.83 | 0.33 | 0.15 | 0.83 | 0.48 |
| 11JY1641 | C6 RIL 303 | 293 | LP   | 1   | 36.23 | 39.20 | 2.48 | 2.06 | 0.22 | 0.13 | 1.08 | 0.35 |
| 11JY1642 | C6 RIL 310 | 294 | LP   | 1   | 43.07 | 40.17 | 3.56 | 3.28 | 0.35 | 0.24 | 0.93 | 0.59 |
| 11JY1643 | C6 RIL 314 | 295 | LP   | 1   | 34.35 | 33.30 | 1.64 | 0.55 | 0.14 | 0.50 | 0.97 | 0.64 |
| 11JY1644 | C6 RIL 315 | 296 | LP   | 1   | 47.63 | 36.40 | 4.27 | 2.98 | 0.40 | 0.23 | 0.76 | 0.63 |
| 11JY1645 | C6 RIL 316 | 297 | LP   | 1   | 25.40 | 42.20 | 1.46 | 0.82 | 0.11 | 0.07 | 1.66 | 0.18 |
| 11JY1646 | C6 RIL 317 | 298 | LP   | 1   | 36.63 | 43.93 | 2.55 | 2.57 | 0.29 | 0.16 | 1.20 | 0.45 |
| 11JY1647 | C6 RIL 318 | 299 | LP   | 1   | 45.27 | 23.00 | 4.62 | 3.56 | 0.43 | 0.28 | 0.51 | 0.71 |
| 11JY1648 | C6 RIL 319 | 300 | LP   | 1   | 33.00 | 30.00 | 2.46 | 1.76 | 0.26 | 0.13 | 0.91 | 0.39 |
| 11JY1649 | C6 RIL 320 | 301 | LP   | 1   | 40.10 | 41.17 | 2.93 | 2.94 | 0.32 | 0.21 | 1.03 | 0.53 |
| 11JY1650 | C6 RIL 321 | 302 | LP   | 1   | 27.50 | 32.43 | 1.49 | 0.58 | 0.23 | 0.12 | 1.18 | 0.35 |
| 11JY1651 | C6 RIL 322 | 303 | LP   | 1   | 38.13 | 40.60 | 4.44 | 2.64 | 0.51 | 0.30 | 1.06 | 0.81 |
| 11JY1652 | C6 RIL 324 | 304 | LP   | 1   | 50.73 | 43.60 | 4.82 | 2.96 | 0.45 | 0.23 | 0.86 | 0.68 |
| 11JY1653 | C6 RIL 327 | 305 | LP   | 1   | 57.10 | 51.60 | 5.66 | 4.43 | 0.53 | 0.32 | 0.90 | 0.85 |
| 11JY1654 | C6 RIL 328 | 306 | LP   | 1   | 46.83 | 48.90 | 4.87 | 2.96 | 0.45 | 0.22 | 1.04 | 0.67 |
| 11JY1655 | C6 RIL 330 | 307 | LP   | 1   | 45.73 | 41.03 | 3.84 | 2.08 | 0.37 | 0.16 | 0.90 | 0.53 |
| 11JY1656 | C6 RIL 332 | 308 | LP   | 1   | 54.30 | 66.07 | 6.01 | 4.75 | 0.53 | 0.34 | 1.22 | 0.87 |
| 11JY1657 | C6 RIL 333 | 309 | LP   | 1   | 47.87 | 33.00 | 3.46 | 2.32 | 0.33 | 0.19 | 0.69 | 0.52 |
| 11JY1658 | C6 RIL 335 | 310 | LP   | 1   | 35.00 | 37.00 | 1.75 | 2.19 | 0.26 | 0.19 | 1.06 | 0.45 |
| 11JY1659 | C6 RIL 336 | 311 | LP   | 1   | 30.50 | 25.00 | 1.37 | 1.32 | 0.21 | 0.13 | 0.82 | 0.34 |
| 11JY1660 | C6 RIL 339 | 312 | LP   | 1   | 31.67 | 43.00 | 2.06 | 1.89 | 0.21 | 0.15 | 1.36 | 0.36 |
| 11JY1661 | C6 RIL 340 | 313 | LP   | 1   | 27.50 | 28.50 | 1.08 | 1.29 | 0.16 | 0.12 | 1.04 | 0.28 |
| 11JY1662 | C6 RIL 341 | 314 | LP   | 1   | 32.50 | 36.25 | 1.64 | 1.81 | 0.25 | 0.20 | 1.12 | 0.45 |
| 11JY1663 | C6 RIL 342 | 315 | LP   | 1   | 34.33 | 60.33 | 2.29 | 2.11 | 0.25 | 0.17 | 1.76 | 0.42 |
| 11JY1664 | C6 RIL 344 | 316 | LP   | 1   | 32.33 | 29.00 | 1.89 | 1.59 | 0.20 | 0.16 | 0.90 | 0.36 |
| 11JY1665 | C6 RIL 346 | 317 | LP   | 1   | 36.47 | 33.07 | 3.75 | 2.01 | 0.36 | 0.17 | 0.91 | 0.53 |
| 11JY1666 | C6 RIL 347 | 318 | LP   | 1   | 39.33 | 55.33 | 3.72 | 2.38 | 0.33 | 0.17 | 1.41 | 0.50 |
| 11JY1667 | C6 RIL 349 | 319 | LP   | 1   | 43.50 | 63.00 | 2.34 | 2.51 | 0.30 | 0.22 | 1.45 | 0.52 |
| 11JY1668 | C6 RIL 352 | 320 | LP   | 1   | 36.00 | 53.00 | 2.00 | 1.86 | 0.24 | 0.15 | 1.47 | 0.39 |
| 11JY1669 | C6 RIL 354 | 321 | LP   | 1   | 33.75 | 57.00 | 1.97 | 1.18 | 0.21 | 0.11 | 1.69 | 0.32 |
| 11JY1670 | C6 RIL 355 | 322 | LP   | 1   | 32.67 | 41.67 | 1.76 | 1.61 | 0.26 | 0.17 | 1.28 | 0.43 |
| 11JY1671 | C6 RIL 356 | 323 | LP   | 1   | 36.00 | 49.67 | 2.25 | 1.80 | 0.28 | 0.15 | 1.38 | 0.43 |

| Seed ID  | Acc                                                                                                    | Gen | trt. | rep | SL    | RL    | SFW  | RFW  | SDW  | RDW  | RSR  | TDM  |
|----------|--------------------------------------------------------------------------------------------------------|-----|------|-----|-------|-------|------|------|------|------|------|------|
| 11JY1672 | C6 RIL 358                                                                                             | 324 | LP   | 1   | 38.00 | 59.00 | 2.53 | 2.70 | 0.26 | 0.20 | 1.55 | 0.46 |
| 11JY1673 | C6 RIL 361                                                                                             | 325 | LP   | 1   | 25.00 | 41.67 | 1.18 | 1.57 | 0.15 | 0.10 | 1.67 | 0.25 |
| 11JY1674 | C6 RIL 362                                                                                             | 326 | LP   | 1   | 39.00 | 43.67 | 3.32 | 2.62 | 0.34 | 0.20 | 1.12 | 0.54 |
| 11JY1675 | C6 RIL 364                                                                                             | 327 | LP   | 1   | 42.33 | 47.33 | 3.07 | 2.31 | 0.34 | 0.18 | 1.12 | 0.52 |
| 11JY1676 | C6 RIL 366                                                                                             | 328 | LP   | 1   | 36.93 | 28.53 | 2.70 | 1.84 | 0.28 | 0.13 | 0.77 | 0.41 |
| 11JY1677 | C6 RIL 368                                                                                             | 329 | LP   | 1   | 36.17 | 37.00 | 1.88 | 1.19 | 0.22 | 0.12 | 1.02 | 0.34 |
| 11JY1678 | C6 RIL 372                                                                                             | 330 | LP   | 1   | 49.33 | 53.33 | 4.01 | 2.23 | 0.41 | 0.19 | 1.08 | 0.60 |
| 11JY1680 | C6 RIL 379                                                                                             | 331 | LP   | 1   | 32.50 | 33.50 | 1.28 | 1.35 | 0.16 | 0.10 | 1.03 | 0.26 |
| 11JY1682 | C6 RIL 382                                                                                             | 332 | LP   | 1   | 39.33 | 45.67 | 2.85 | 2.09 | 0.31 | 0.20 | 1.16 | 0.51 |
| 11JY1683 | C6 RIL 388                                                                                             | 333 | LP   | 1   | 41.00 | 44.67 | 3.40 | 2.89 | 0.37 | 0.27 | 1.09 | 0.64 |
| 11JY1684 | C6 RIL 391                                                                                             | 334 | LP   | 1   | 31.00 | 36.00 | 1.89 | 2.01 | 0.20 | 0.14 | 1.16 | 0.34 |
| 11JY1686 | C6 RIL 394                                                                                             | 335 | LP   | 1   | 37.67 | 51.67 | 3.15 | 2.95 | 0.33 | 0.22 | 1.37 | 0.55 |
| 11JY1687 | C6 RIL 395                                                                                             | 336 | LP   | 1   | 43.00 | 44.67 | 3.59 | 4.35 | 0.38 | 0.22 | 1.04 | 0.60 |
| 11JY1688 | C6 RIL 398                                                                                             | 337 | LP   | 1   | 40.33 | 40.33 | 3.52 | 3.17 | 0.35 | 0.24 | 1.00 | 0.59 |
| 11JY1689 | C6 RIL 400                                                                                             | 338 | LP   | 1   | 34.67 | 26.00 | 1.60 | 1.24 | 0.18 | 0.11 | 0.75 | 0.29 |
| 11JY2045 | (CUBA/GUAD C1 F27-4-3-3-B-1-Bx[KILIMA ST94A]-30/MSV-03-2-10-B-2-B-B)-160-1-B-3-B                       | 339 | LP   | 1   | 35.08 | 47.39 | 2.28 | 1.37 | 0.25 | 0.18 | 1.35 | 0.43 |
| 11JY2047 | [[MSRXPOOL9]C1F2-176-4-7-X-1-B/CML206]-5-2-3-1-BBBBB-B-B-B                                             | 340 | LP   | 1   | 44.41 | 54.39 | 4.24 | 2.85 | 0.47 | 0.30 | 1.22 | 0.77 |
| 11JY2051 | [CML199/[EV7992#/EV8449-SR]C1F2-334-1(OSU8i)-6-3-Sn]-B-23-2-2-B*4-B-B-B                                | 341 | LP   | 1   | 31.58 | 40.81 | 1.80 | 2.01 | 0.36 | 0.16 | 1.29 | 0.52 |
| 11JY2052 | [CML312/[TUXPSEQ]C1F2/P49-SR]F2-45-3-2-1-BB/[INTA-F2-192-2-1-1-1-BBBB]-1-5-1-1-1-BBB-B-B-B             | 342 | LP   | 1   | 36.08 | 35.73 | 2.87 | 1.74 | 0.33 | 0.18 | 0.99 | 0.51 |
| 11JY2053 | [CML312/CML445/[TUXPSEQ]C1F2/P49-SR]F2-45-3-2-1-BBB]-1-2-1-1-2-BBB-B-B-B                               | 343 | LP   | 1   | 27.58 | 33.81 | 1.35 | 0.83 | 0.18 | 0.07 | 1.23 | 0.25 |
| 11JY2054 | [CML312/MAS[MSR/312]-109-3]-B-71-3-BBB-B-B-B                                                           | 344 | LP   | 1   | 40.74 | 48.73 | 3.18 | 1.89 | 0.36 | 0.17 | 1.20 | 0.52 |
| 11JY2055 | [CML389/CML176]-B-29-2-2-B*5                                                                           | 345 | LP   | 1   | 37.08 | 44.73 | 3.47 | 2.29 | 0.35 | 0.21 | 1.21 | 0.55 |
| 11JY2056 | [CML395/CML440/[LPSC3H144-1-2-2-2-4-#-BB/SC/ZM605#b-19-2-X]-1-2-X-1-1-BB]-1-2-1-1-B]-3-2-1-1-BBB-B-B-B | 346 | LP   | 1   | 36.74 | 55.89 | 3.17 | 2.48 | 0.34 | 0.23 | 1.52 | 0.57 |
| 11JY2060 | [CML444/ZSR923S4BULK-2-2-X-X-X-1-BB]-1-1-1-2/CML441]-1-1-1-2-BBB-B-B-B                                 | 347 | LP   | 1   | 35.58 | 39.81 | 2.19 | 1.21 | 0.32 | 0.18 | 1.12 | 0.50 |
| 11JY2061 | [DRB-F2-180-2/DRB-3-4-1]-X-6-1-3-BB-2-BBBBBB-B-B-B                                                     | 348 | LP   | 1   | 29.58 | 50.48 | 2.06 | 1.95 | 0.29 | 0.15 | 1.71 | 0.44 |

| Seed ID  | Acc                                                                            | Gen | trt. | rep | SL    | RL    | SFW  | RFW  | SDW  | RDW  | RSR  | TDM  |
|----------|--------------------------------------------------------------------------------|-----|------|-----|-------|-------|------|------|------|------|------|------|
| 11JY2063 | [DTPWC8F31-4-2-1-6-B2/CML395/[CML445/ZM621B]-2-1-2-3-1-BB]-3-2-1-1-1-2-B-B-B   | 349 | LP   | 1   | 42.74 | 50.39 | 3.23 | 1.85 | 0.33 | 0.21 | 1.18 | 0.54 |
| 11JY2064 | [Ent320:92SEW2-77/[DMRESR-W]EarlySel-#I-2-4-B/CML386]-B-11-3-B-2-#-B*4         | 350 | LP   | 1   | 28.91 | 60.48 | 1.69 | 2.17 | 0.25 | 0.15 | 2.09 | 0.40 |
| 11JY2065 | [LZ956441/LZ966205]-B-3-4-4-B-5-BBBBB-B-B-B                                    | 351 | LP   | 1   | 39.24 | 67.81 | 3.50 | 4.05 | 0.46 | 0.30 | 1.73 | 0.75 |
| 11JY2066 | [MSRXPOOL9]C1F2-205-1(OSU23i)-5-3-X-X-1-B/EV7992/EV8449...-3-2-2-1-BBBBB-B-B-B | 352 | LP   | 1   | 34.24 | 55.48 | 3.61 | 2.30 | 0.42 | 0.21 | 1.62 | 0.62 |
| 11JY2067 | [SYN-USAB2/SYN-ELIB2]-12-1-1-1-B*4-B-B-B                                       | 353 | LP   | 1   | 45.08 | 63.73 | 4.36 | 3.10 | 0.54 | 0.25 | 1.41 | 0.80 |
| 11JY2070 | 02SADVE2B-#-42-1-1-1-1-B-B-B                                                   | 354 | LP   | 1   | 31.24 | 65.81 | 2.55 | 1.95 | 0.28 | 0.15 | 2.11 | 0.43 |
| 11JY2071 | 02SADVL2B-#-16-2-1-B-B-B                                                       | 355 | LP   | 1   | 30.24 | 47.14 | 1.36 | 1.44 | 0.24 | 0.18 | 1.56 | 0.42 |
| 11JY2075 | 20V-18                                                                         | 356 | LP   | 1   | 34.91 | 35.48 | 2.71 | 1.46 | 0.50 | 0.22 | 1.02 | 0.71 |
| 11JY2076 | 622016-ZCN-2                                                                   | 357 | LP   | 1   | 45.91 | 40.81 | 4.19 | 2.84 | 0.44 | 0.24 | 0.89 | 0.68 |
| 11JY2078 | 761BB2 BCox751B-B-1-1-B-B-B-B-B-B                                              | 358 | LP   | 1   | 44.24 | 42.89 | 4.17 | 3.49 | 0.52 | 0.36 | 0.97 | 0.87 |
| 11JY2079 | BRAZ 2309                                                                      | 359 | LP   | 1   | 38.41 | 39.39 | 2.65 | 1.79 | 0.28 | 0.16 | 1.03 | 0.44 |
| 11JY2081 | CL-04934 (P49C2H12-5-4xP23C2-11-1)-2-2-2-B*10                                  | 360 | LP   | 1   | 33.74 | 34.73 | 3.39 | 2.71 | 0.36 | 0.24 | 1.03 | 0.60 |
| 11JY2083 | CML103                                                                         | 361 | LP   | 1   | 41.91 | 56.48 | 3.37 | 2.53 | 0.46 | 0.31 | 1.35 | 0.78 |
| 11JY2085 | CML114                                                                         | 362 | LP   | 1   | 44.74 | 58.39 | 4.15 | 4.09 | 0.46 | 0.37 | 1.31 | 0.83 |
| 11JY2086 | CML115                                                                         | 363 | LP   | 1   | 37.74 | 41.39 | 3.07 | 2.57 | 0.31 | 0.21 | 1.10 | 0.53 |
| 11JY2087 | CML116                                                                         | 364 | LP   | 1   | 37.58 | 46.48 | 2.73 | 2.32 | 0.30 | 0.20 | 1.24 | 0.50 |
| 11JY2088 | CML118                                                                         | 365 | LP   | 1   | 37.91 | 49.48 | 3.65 | 2.81 | 0.41 | 0.23 | 1.31 | 0.64 |
| 11JY2090 | CML127                                                                         | 366 | LP   | 1   | 38.58 | 55.81 | 3.31 | 2.91 | 0.38 | 0.18 | 1.45 | 0.55 |
| 11JY2091 | CML130                                                                         | 367 | LP   | 1   | 32.91 | 47.48 | 1.27 | 0.92 | 0.17 | 0.07 | 1.44 | 0.23 |
| 11JY2092 | CML133                                                                         | 368 | LP   | 1   | 40.58 | 65.14 | 3.51 | 4.69 | 0.58 | 0.33 | 1.61 | 0.91 |
| 11JY2093 | CML134                                                                         | 369 | LP   | 1   | 32.24 | 39.14 | 1.47 | 1.03 | 0.26 | 0.13 | 1.21 | 0.38 |
| 11JY2094 | CML135                                                                         | 370 | LP   | 1   | 33.24 | 46.48 | 3.45 | 3.98 | 0.45 | 0.33 | 1.40 | 0.78 |
| 11JY2102 | CML169                                                                         | 371 | LP   | 1   | 40.08 | 42.01 | 2.86 | 1.84 | 0.32 | 0.14 | 1.05 | 0.46 |
| 11JY2103 | CML170                                                                         | 372 | LP   | 1   | 43.24 | 47.34 | 3.74 | 3.38 | 0.40 | 0.25 | 1.09 | 0.66 |
| 11JY2107 | CML192                                                                         | 373 | LP   | 1   | 48.58 | 45.68 | 5.50 | 2.85 | 0.52 | 0.25 | 0.94 | 0.78 |
| 11JY2108 | CML20                                                                          | 374 | LP   | 1   | 44.08 | 40.39 | 3.46 | 2.00 | 0.37 | 0.21 | 0.92 | 0.58 |
| 11JY2109 | CML202                                                                         | 375 | LP   | 1   | 39.91 | 51.34 | 4.19 | 3.12 | 0.41 | 0.26 | 1.29 | 0.67 |
| 11JY2110 | CML206                                                                         | 376 | LP   | 1   | 45.24 | 56.01 | 4.97 | 3.22 | 0.51 | 0.28 | 1.24 | 0.80 |
| 11JY2112 | CML226                                                                         | 377 | LP   | 1   | 31.91 | 41.68 | 2.24 | 1.52 | 0.27 | 0.12 | 1.31 | 0.40 |
| 11JY2114 | CML229                                                                         | 378 | LP   | 1   | 43.41 | 39.73 | 4.26 | 2.46 | 0.43 | 0.21 | 0.92 | 0.64 |
| 11JY2117 | CML283                                                                         | 379 | LP   | 1   | 40.00 | 36.68 | 2.87 | 1.81 | 0.29 | 0.15 | 0.92 | 0.44 |
| 11JY2122 | CML290                                                                         | 380 | LP   | 1   | 32.24 | 38.39 | 2.53 | 1.77 | 0.24 | 0.17 | 1.19 | 0.41 |

| Seed ID  | Acc                                                             | Gen | trt. | rep | SL    | RL    | SFW  | RFW  | SDW  | RDW  | RSR  | TDM  |
|----------|-----------------------------------------------------------------|-----|------|-----|-------|-------|------|------|------|------|------|------|
| 11JY2125 | CML304                                                          | 381 | LP   | 1   | 35.58 | 39.68 | 3.56 | 3.07 | 0.36 | 0.22 | 1.12 | 0.58 |
| 11JY2126 | CML31                                                           | 382 | LP   | 1   | 34.24 | 50.01 | 2.55 | 1.72 | 0.30 | 0.14 | 1.46 | 0.44 |
| 11JY2127 | CML311/MBR C3 BC F23-1-2-1-B-B-B                                | 383 | LP   | 1   | 41.91 | 48.34 | 4.33 | 3.02 | 0.44 | 0.21 | 1.15 | 0.65 |
| 11JY2128 | CML311/MBR C3 BC F3-1-1-1-B-B-B                                 | 384 | LP   | 1   | 41.91 | 45.68 | 3.91 | 2.39 | 0.41 | 0.23 | 1.09 | 0.65 |
| 11JY2129 | CML311/MBR C3 BC F3-1-1-2-B-B                                   | 385 | LP   | 1   | 45.41 | 45.73 | 3.69 | 2.55 | 0.41 | 0.25 | 1.01 | 0.66 |
| 11JY2132 | CML311/MBR C3 BC F43-2-1-1-B-B-B                                | 386 | LP   | 1   | 35.58 | 50.68 | 2.89 | 2.16 | 0.28 | 0.15 | 1.42 | 0.43 |
| 11JY2133 | CML311/MBR C3 BC F65-1-2-2-B-B-B                                | 387 | LP   | 1   | 39.91 | 62.68 | 3.47 | 2.83 | 0.34 | 0.21 | 1.57 | 0.55 |
| 11JY2134 | CML311/MBR C3 BC F95-2-2-1-B-B-B                                | 388 | LP   | 1   | 44.58 | 61.68 | 4.82 | 4.78 | 0.48 | 0.38 | 1.38 | 0.87 |
| 11JY2136 | CML312SR                                                        | 389 | LP   | 1   | 40.58 | 55.01 | 3.63 | 2.38 | 0.35 | 0.19 | 1.36 | 0.54 |
| 11JY2137 | CML312SRQ=[[(CLQ-RCWQ83xCML312SR)xCML312SR]xCML312SR)]-15-1-BBB | 390 | LP   | 1   | 35.58 | 33.34 | 2.98 | 2.17 | 0.38 | 0.17 | 0.94 | 0.55 |
| 11JY2140 | CML322                                                          | 391 | LP   | 1   | 37.24 | 44.68 | 4.47 | 3.69 | 0.47 | 0.24 | 1.20 | 0.71 |
| 11JY2141 | CML323                                                          | 392 | LP   | 1   | 54.91 | 44.68 | 6.22 | 3.61 | 0.63 | 0.29 | 0.81 | 0.92 |
| 11JY2142 | CML325                                                          | 393 | LP   | 1   | 40.24 | 64.68 | 4.19 | 3.06 | 0.45 | 0.31 | 1.61 | 0.77 |
| 11JY2144 | CML328                                                          | 394 | LP   | 1   | 48.24 | 62.68 | 5.45 | 3.57 | 0.54 | 0.29 | 1.30 | 0.84 |
| 11JY2146 | CML338                                                          | 395 | LP   | 1   | 45.24 | 57.81 | 5.06 | 3.87 | 0.52 | 0.33 | 1.28 | 0.85 |
| 11JY2147 | CML360                                                          | 396 | LP   | 1   | 45.91 | 46.48 | 4.81 | 3.19 | 0.49 | 0.27 | 1.01 | 0.76 |
| 11JY2148 | CML361                                                          | 397 | LP   | 1   | 41.24 | 49.81 | 3.66 | 2.78 | 0.35 | 0.23 | 1.21 | 0.57 |
| 11JY2149 | CML364                                                          | 398 | LP   | 1   | 46.01 | 47.31 | 3.85 | 2.64 | 0.45 | 0.22 | 1.03 | 0.67 |
| 11JY2150 | CML380xMBR/MDR C3 BC F21-1-1-2-B-B-B-B-3-1-B-B-B                | 399 | LP   | 1   | 29.24 | 60.48 | 3.17 | 2.63 | 0.32 | 0.20 | 2.07 | 0.52 |
| 11JY2151 | CML384xMBR/MDR C3 BC F58-2-1-3-B-B-B-B-3-1-B-B-B                | 400 | LP   | 1   | 41.34 | 40.64 | 4.57 | 2.69 | 0.51 | 0.23 | 0.98 | 0.74 |
| 11JY2152 | CML389                                                          | 401 | LP   | 1   | 43.68 | 53.64 | 5.04 | 3.52 | 0.43 | 0.26 | 1.23 | 0.69 |
| 11JY2153 | CML389/CML144//CML159//POOL15QPMSR-B-6-B-B                      | 402 | LP   | 1   | 41.01 | 43.98 | 3.71 | 2.56 | 0.41 | 0.22 | 1.07 | 0.63 |
| 11JY2154 | CML40                                                           | 403 | LP   | 1   | 43.34 | 63.98 | 4.06 | 3.33 | 0.42 | 0.25 | 1.48 | 0.67 |
| 11JY2155 | CML402                                                          | 404 | LP   | 1   | 51.01 | 55.31 | 7.41 | 3.90 | 0.78 | 0.30 | 1.08 | 1.08 |
| 11JY2157 | CML411                                                          | 405 | LP   | 1   | 43.34 | 50.64 | 4.75 | 2.61 | 0.41 | 0.25 | 1.17 | 0.66 |
| 11JY2160 | CML423                                                          | 406 | LP   | 1   | 43.01 | 54.98 | 4.53 | 2.87 | 0.39 | 0.25 | 1.28 | 0.65 |
| 11JY2162 | CML428                                                          | 407 | LP   | 1   | 45.01 | 52.98 | 4.49 | 3.01 | 0.48 | 0.25 | 1.18 | 0.73 |
| 11JY2163 | CML430                                                          | 408 | LP   | 1   | 42.84 | 55.64 | 5.52 | 2.85 | 0.41 | 0.22 | 1.30 | 0.63 |
| 11JY2164 | CML431                                                          | 409 | LP   | 1   | 36.68 | 40.64 | 3.05 | 1.62 | 0.27 | 0.13 | 1.11 | 0.40 |
| 11JY2165 | CML432                                                          | 410 | LP   | 1   | 39.34 | 38.64 | 4.53 | 2.15 | 0.40 | 0.19 | 0.98 | 0.58 |
| 11JY2166 | CML433                                                          | 411 | LP   | 1   | 37.34 | 42.14 | 4.31 | 2.66 | 0.42 | 0.21 | 1.13 | 0.63 |

| Seed ID  | Acc                                         | Gen | trt. | rep | SL    | RL    | SFW  | RFW  | SDW  | RDW  | RSR  | TDM  |
|----------|---------------------------------------------|-----|------|-----|-------|-------|------|------|------|------|------|------|
| 11JY2168 | CML445/CML144//CML159//POOL15QPMsR-B-55-B-B | 412 | LP   | 1   | 42.34 | 53.98 | 4.77 | 2.98 | 0.52 | 0.29 | 1.27 | 0.81 |
| 11JY2170 | CML454                                      | 413 | LP   | 1   | 40.34 | 69.98 | 3.13 | 3.13 | 0.32 | 0.26 | 1.73 | 0.58 |
| 11JY2172 | CML468                                      | 414 | LP   | 1   | 45.01 | 45.31 | 3.10 | 2.20 | 0.30 | 0.17 | 1.01 | 0.47 |
| 11JY2173 | CML470                                      | 415 | LP   | 1   | 46.01 | 45.31 | 4.49 | 3.00 | 0.43 | 0.31 | 0.98 | 0.74 |
| 11JY2176 | CML479                                      | 416 | LP   | 1   | 29.68 | 60.31 | 2.89 | 2.48 | 0.31 | 0.22 | 2.03 | 0.53 |
| 11JY2177 | CML480                                      | 417 | LP   | 1   | 38.68 | 46.64 | 3.17 | 1.86 | 0.32 | 0.22 | 1.21 | 0.54 |
| 11JY2180 | CML496                                      | 418 | LP   | 1   | 30.24 | 40.14 | 2.53 | 1.56 | 0.23 | 0.14 | 1.33 | 0.37 |
| 11JY2189 | CML80                                       | 419 | LP   | 1   | 52.68 | 62.64 | 6.58 | 4.24 | 0.54 | 0.36 | 1.19 | 0.90 |
| 11JY2192 | CML94                                       | 420 | LP   | 1   | 50.34 | 59.64 | 5.52 | 4.19 | 0.54 | 0.42 | 1.18 | 0.96 |
| 11JY2193 | CML96                                       | 421 | LP   | 1   | 45.34 | 42.31 | 4.66 | 2.25 | 0.40 | 0.23 | 0.93 | 0.63 |
| 11JY2194 | CML99                                       | 422 | LP   | 1   | 38.01 | 44.64 | 4.13 | 2.58 | 0.42 | 0.27 | 1.17 | 0.69 |
| 11JY2196 | Cuba/GuadC3F125-2-2-1-B-B-B                 | 423 | LP   | 1   | 42.08 | 43.39 | 4.49 | 3.01 | 0.43 | 0.25 | 1.03 | 0.68 |
| 11JY2197 | CY9169                                      | 424 | LP   | 1   | 43.38 | 44.47 | 4.12 | 2.20 | 0.41 | 0.19 | 1.03 | 0.60 |
| 11JY2198 | DTPW C9                                     | 425 | LP   | 1   | 33.22 | 44.81 | 3.69 | 3.04 | 0.46 | 0.29 | 1.35 | 0.76 |
| 11JY2199 | DTPWC9-F104-5-4-1-1-B-B-B                   | 426 | LP   | 1   | 42.22 | 54.81 | 4.01 | 2.78 | 0.47 | 0.23 | 1.30 | 0.70 |
| 11JY2200 | DTPY C9                                     | 427 | LP   | 1   | 40.24 | 55.81 | 4.61 | 3.62 | 0.47 | 0.33 | 1.39 | 0.81 |
| 11JY2201 | DTPYC9-F46-1-2-1-2-B-B                      | 428 | LP   | 1   | 44.38 | 50.14 | 3.75 | 2.99 | 0.46 | 0.24 | 1.13 | 0.70 |
| 11JY2202 | DTPYC9-F46-3-9-1-1-B-BTL-07B 6614-42        | 429 | LP   | 1   | 31.22 | 40.81 | 2.11 | 1.27 | 0.27 | 0.11 | 1.31 | 0.38 |
| 11JY2204 | Guad 6                                      | 430 | LP   | 1   | 44.05 | 47.47 | 4.02 | 3.11 | 0.48 | 0.28 | 1.08 | 0.77 |
| 11JY2205 | H-16                                        | 431 | LP   | 1   | 42.05 | 58.14 | 4.39 | 3.87 | 0.48 | 0.28 | 1.38 | 0.75 |
| 11JY2207 | La Posta Seq C7-F125-2-1-1-2-B-B-B          | 432 | LP   | 1   | 32.38 | 48.47 | 3.41 | 2.73 | 0.36 | 0.24 | 1.50 | 0.60 |
| 11JY2211 | La Posta Seq C7-F64-2-6-1-2-B-B-B           | 433 | LP   | 1   | 43.91 | 54.14 | 4.23 | 3.68 | 0.42 | 0.32 | 1.23 | 0.74 |
| 11JY2216 | La Posta Seq C7-F96-1-2-1-2-B-B             | 434 | LP   | 1   | 41.91 | 66.81 | 3.86 | 2.61 | 0.36 | 0.21 | 1.59 | 0.57 |
| 11JY2218 | LPSC7                                       | 435 | LP   | 1   | 37.38 | 57.14 | 3.49 | 3.14 | 0.36 | 0.23 | 1.53 | 0.59 |
| 11JY2220 | MAS[206/312]-23-2-1-1-B*6-B-B-B             | 436 | LP   | 1   | 45.72 | 49.14 | 3.43 | 2.41 | 0.37 | 0.19 | 1.07 | 0.56 |
| 11JY2223 | MBR C6 BC F234-1-B-#-1-1-B-B-B-B-B          | 437 | LP   | 1   | 39.38 | 47.47 | 3.80 | 2.41 | 0.42 | 0.22 | 1.21 | 0.64 |
| 11JY2225 | P402c2F2-695-2-BB-2-B*4-1-B                 | 438 | LP   | 1   | 34.72 | 43.81 | 2.75 | 2.15 | 0.31 | 0.17 | 1.26 | 0.48 |
| 11JY2228 | P591c4 F55-2-2-2-B-B-B                      | 439 | LP   | 1   | 49.72 | 38.81 | 4.17 | 2.54 | 0.45 | 0.22 | 0.78 | 0.67 |
| 11JY2229 | P591c41y2GENF3-1-1-2-B-B-B                  | 440 | LP   | 1   | 32.05 | 43.14 | 2.38 | 1.58 | 0.27 | 0.15 | 1.35 | 0.41 |
| 11JY2230 | PAZM 6053                                   | 441 | LP   | 1   | 26.22 | 43.31 | 2.45 | 1.77 | 0.28 | 0.12 | 1.65 | 0.40 |
| 11JY2231 | Pool 21 x Pool 22                           | 442 | LP   | 1   | 39.72 | 39.14 | 2.50 | 2.06 | 0.33 | 0.13 | 0.99 | 0.46 |
| 11JY2233 | R15                                         | 443 | LP   | 1   | 44.58 | 69.48 | 4.34 | 2.92 | 0.37 | 0.20 | 1.56 | 0.58 |
| 11JY2234 | RD0M 330                                    | 444 | LP   | 1   | 31.38 | 43.81 | 2.23 | 2.22 | 0.29 | 0.14 | 1.40 | 0.44 |
| 11JY2238 | VL0512452                                   | 445 | LP   | 1   | 38.72 | 58.14 | 4.08 | 3.18 | 0.50 | 0.29 | 1.50 | 0.79 |
| 11JY2239 | VL0512464                                   | 446 | LP   | 1   | 36.05 | 52.47 | 3.34 | 2.17 | 0.36 | 0.18 | 1.46 | 0.53 |

| Seed ID  | Acc                                                                      | Gen | trt. | rep | SL    | RL    | SFW  | RFW  | SDW  | RDW  | RSR  | TDM  |
|----------|--------------------------------------------------------------------------|-----|------|-----|-------|-------|------|------|------|------|------|------|
| 11JY2240 | VL05128                                                                  | 447 | LP   | 1   | 37.50 | 60.01 | 2.13 | 1.95 | 0.34 | 0.14 | 1.60 | 0.48 |
| 11JY2241 | VL052                                                                    | 448 | LP   | 1   | 38.91 | 41.48 | 3.18 | 2.11 | 0.33 | 0.16 | 1.07 | 0.49 |
| 11JY2243 | VL05353                                                                  | 449 | LP   | 1   | 50.91 | 58.48 | 5.22 | 4.02 | 0.52 | 0.29 | 1.15 | 0.82 |
| 11JY2244 | VL054178                                                                 | 450 | LP   | 1   | 40.50 | 63.68 | 3.03 | 2.51 | 0.40 | 0.19 | 1.57 | 0.60 |
| 11JY2246 | VL054881                                                                 | 451 | LP   | 1   | 43.16 | 48.01 | 2.90 | 2.68 | 0.42 | 0.25 | 1.11 | 0.67 |
| 11JY2248 | VL0556                                                                   | 452 | LP   | 1   | 35.16 | 59.01 | 2.45 | 2.10 | 0.30 | 0.12 | 1.68 | 0.42 |
| 11JY2249 | VL05561                                                                  | 453 | LP   | 1   | 38.16 | 58.68 | 2.91 | 2.50 | 0.37 | 0.18 | 1.54 | 0.55 |
| 11JY2250 | VL0558                                                                   | 454 | LP   | 1   | 35.08 | 64.31 | 4.37 | 3.30 | 0.41 | 0.28 | 1.83 | 0.69 |
| 11JY2252 | VL05616                                                                  | 455 | LP   | 1   | 39.41 | 52.14 | 4.26 | 2.76 | 0.39 | 0.25 | 1.32 | 0.65 |
| 11JY2255 | VL056942                                                                 | 456 | LP   | 1   | 33.08 | 50.14 | 3.43 | 2.07 | 0.36 | 0.21 | 1.52 | 0.57 |
| 11JY2259 | VL062784                                                                 | 457 | LP   | 1   | 37.41 | 46.14 | 3.43 | 1.90 | 0.36 | 0.21 | 1.23 | 0.56 |
| 11JY2260 | VL062785                                                                 | 458 | LP   | 1   | 45.08 | 63.81 | 4.89 | 3.01 | 0.48 | 0.30 | 1.42 | 0.78 |
| 11JY2262 | VL06384                                                                  | 459 | LP   | 1   | 36.58 | 51.31 | 3.16 | 1.84 | 0.26 | 0.17 | 1.40 | 0.43 |
| 11JY2263 | ZM521B-66-4-1-1-BB-B-B-B                                                 | 460 | LP   | 1   | 43.74 | 53.06 | 3.77 | 2.30 | 0.36 | 0.18 | 1.21 | 0.54 |
| 11JY2264 | 川29♀                                                                     | 461 | LP   | 1   | 39.41 | 43.06 | 3.58 | 1.87 | 0.35 | 0.16 | 1.09 | 0.50 |
| 11JY2265 | 慈溪白糯                                                                     | 462 | LP   | 1   | 34.08 | 46.73 | 2.77 | 2.17 | 0.26 | 0.18 | 1.37 | 0.43 |
| 11JY2266 | 独紫                                                                       | 463 | LP   | 1   | 43.74 | 46.39 | 4.45 | 2.43 | 0.37 | 0.20 | 1.06 | 0.57 |
| 11JY2268 | 交51                                                                      | 464 | LP   | 1   | 38.41 | 43.73 | 4.09 | 2.49 | 0.37 | 0.20 | 1.14 | 0.57 |
| 11JY2269 | 双M9                                                                      | 465 | LP   | 1   | 39.58 | 47.31 | 4.74 | 3.26 | 0.51 | 0.25 | 1.20 | 0.77 |
| 11JY2270 | 四川地方种质                                                                   | 466 | LP   | 1   | 52.08 | 52.73 | 5.43 | 3.16 | 0.52 | 0.24 | 1.01 | 0.76 |
| 11JY2271 | 豫综BC15-2                                                                 | 467 | LP   | 1   | 41.41 | 48.06 | 3.88 | 1.85 | 0.43 | 0.22 | 1.16 | 0.66 |
| 11JY2279 | 407                                                                      | 468 | LP   | 1   | 33.74 | 31.06 | 2.71 | 1.41 | 0.25 | 0.12 | 0.92 | 0.37 |
| 11JY2280 | 412                                                                      | 469 | LP   | 1   | 39.08 | 37.81 | 4.07 | 2.33 | 0.37 | 0.21 | 0.97 | 0.58 |
| 11JY2288 | 485                                                                      | 470 | LP   | 1   | 46.24 | 56.81 | 5.55 | 4.00 | 0.51 | 0.32 | 1.23 | 0.83 |
| 11JY2290 | 495                                                                      | 471 | LP   | 1   | 40.58 | 53.48 | 3.71 | 2.54 | 0.35 | 0.23 | 1.32 | 0.58 |
| 11JY2311 | 8001                                                                     | 472 | LP   | 1   | 35.74 | 38.81 | 3.01 | 1.59 | 0.27 | 0.17 | 1.09 | 0.45 |
| 11JY2317 | [(CML395/CML444)-B-4-1-3-1-B/CML395//DTPWC8F31-1-1-2-2]-5-1-2-2-BB-B-B-B | 473 | LP   | 1   | 33.24 | 65.81 | 2.68 | 2.22 | 0.25 | 0.19 | 1.98 | 0.44 |
| 11JY2327 | 4F1                                                                      | 474 | LP   | 1   | 40.24 | 42.48 | 4.95 | 3.85 | 0.50 | 0.33 | 1.06 | 0.83 |
| 11JY2356 | B73                                                                      | 475 | LP   | 1   | 40.24 | 40.73 | 3.78 | 1.70 | 0.42 | 0.19 | 1.01 | 0.62 |
| 11JY2391 | E28                                                                      | 476 | LP   | 1   | 40.58 | 45.48 | 4.85 | 2.90 | 0.44 | 0.20 | 1.12 | 0.64 |
| 11JY2394 | ES40                                                                     | 477 | LP   | 1   | 37.08 | 42.81 | 3.37 | 1.95 | 0.29 | 0.17 | 1.15 | 0.46 |
| 11JY2396 | F42                                                                      | 478 | LP   | 1   | 41.24 | 39.81 | 6.84 | 4.25 | 0.67 | 0.47 | 0.97 | 1.13 |
| 11JY2398 | FR19                                                                     | 479 | LP   | 1   | 31.58 | 43.14 | 2.11 | 1.37 | 0.24 | 0.10 | 1.37 | 0.34 |
| 11JY2426 | MBNA                                                                     | 480 | LP   | 1   | 38.83 | 44.68 | 3.20 | 2.30 | 0.38 | 0.17 | 1.15 | 0.55 |

| Seed ID  | Acc                                                                             | Gen | trt. | rep | SL    | RL    | SFW  | RFW  | SDW  | RDW  | RSR  | TDM  |
|----------|---------------------------------------------------------------------------------|-----|------|-----|-------|-------|------|------|------|------|------|------|
| 11JY2434 | NS701                                                                           | 481 | LP   | 1   | 42.83 | 66.01 | 3.28 | 2.44 | 0.39 | 0.18 | 1.54 | 0.57 |
| 11JY2445 | PHG83                                                                           | 482 | LP   | 1   | 44.50 | 60.34 | 4.07 | 3.37 | 0.43 | 0.17 | 1.36 | 0.61 |
| 11JY2446 | PHN47                                                                           | 483 | LP   | 1   | 38.50 | 43.01 | 3.30 | 2.87 | 0.41 | 0.17 | 1.12 | 0.58 |
| 11JY2453 | R09                                                                             | 484 | LP   | 1   | 43.58 | 60.31 | 4.44 | 3.81 | 0.49 | 0.33 | 1.38 | 0.82 |
| 11JY2467 | Va35                                                                            | 485 | LP   | 1   | 34.74 | 49.48 | 4.24 | 2.41 | 0.36 | 0.22 | 1.42 | 0.58 |
| 11JY2470 | W8304                                                                           | 486 | LP   | 1   | 48.08 | 37.48 | 5.30 | 2.39 | 0.46 | 0.28 | 0.78 | 0.73 |
| 11JY2474 | XZY364-1                                                                        | 487 | LP   | 1   | 35.66 | 38.06 | 1.04 | 0.95 | 0.22 | 0.12 | 1.07 | 0.34 |
| 11JY2491 | 长3154                                                                           | 488 | LP   | 1   | 34.99 | 40.89 | 1.87 | 1.58 | 0.34 | 0.14 | 1.17 | 0.48 |
| 11JY2498 | 丹3130                                                                           | 489 | LP   | 1   | 32.41 | 38.48 | 3.24 | 2.18 | 0.32 | 0.23 | 1.19 | 0.55 |
| 11JY2500 | 丹340                                                                            | 490 | LP   | 1   | 35.33 | 45.73 | 2.91 | 2.69 | 0.37 | 0.23 | 1.29 | 0.59 |
| 11JY2504 | 丹360                                                                            | 491 | LP   | 1   | 40.08 | 46.81 | 4.04 | 2.24 | 0.45 | 0.21 | 1.17 | 0.67 |
| 11JY2522 | 辐746                                                                            | 492 | LP   | 1   | 45.41 | 58.81 | 4.41 | 2.75 | 0.40 | 0.27 | 1.30 | 0.66 |
| 11JY2526 | 旱21                                                                             | 493 | LP   | 1   | 40.74 | 44.14 | 4.28 | 2.36 | 0.39 | 0.21 | 1.08 | 0.61 |
| 11JY2547 | 吉419                                                                            | 494 | LP   | 1   | 48.08 | 62.81 | 5.07 | 3.41 | 0.50 | 0.36 | 1.31 | 0.87 |
| 11JY2557 | 吉846                                                                            | 495 | LP   | 1   | 50.16 | 60.68 | 6.05 | 4.00 | 0.63 | 0.28 | 1.21 | 0.92 |
| 11JY2563 | 冀研01-3-2-2-1-5-1                                                                | 496 | LP   | 1   | 40.16 | 62.68 | 4.80 | 2.41 | 0.49 | 0.21 | 1.56 | 0.70 |
| 11JY2570 | 金黄96C                                                                           | 497 | LP   | 1   | 41.99 | 56.39 | 2.75 | 2.14 | 0.34 | 0.20 | 1.34 | 0.54 |
| 11JY2574 | 辽138                                                                            | 498 | LP   | 1   | 39.83 | 57.68 | 4.67 | 2.60 | 0.44 | 0.18 | 1.45 | 0.63 |
| 11JY2587 | 辽孤001                                                                           | 499 | LP   | 1   | 42.74 | 54.06 | 4.52 | 2.64 | 0.49 | 0.27 | 1.26 | 0.76 |
| 11JY2603 | 齐205                                                                            | 500 | LP   | 1   | 50.41 | 45.73 | 4.89 | 2.57 | 0.51 | 0.29 | 0.91 | 0.80 |
| 11JY2606 | 齐310                                                                            | 501 | LP   | 1   | 34.74 | 30.06 | 2.91 | 1.41 | 0.31 | 0.14 | 0.87 | 0.45 |
| 11JY2621 | 双105                                                                            | 502 | LP   | 1   | 42.41 | 36.06 | 3.67 | 2.00 | 0.33 | 0.16 | 0.85 | 0.50 |
| 11JY2623 | 双741                                                                            | 503 | LP   | 1   | 44.41 | 39.73 | 4.32 | 2.10 | 0.39 | 0.17 | 0.89 | 0.56 |
| 11JY2667 | 郑22                                                                             | 504 | LP   | 1   | 40.50 | 51.68 | 3.83 | 2.62 | 0.46 | 0.23 | 1.28 | 0.70 |
| 11JY2672 | 郑29                                                                             | 505 | LP   | 1   | 44.49 | 41.39 | 4.26 | 2.75 | 0.47 | 0.27 | 0.93 | 0.73 |
| 11JY2675 | 郑30                                                                             | 506 | LP   | 1   | 40.83 | 47.01 | 3.92 | 2.25 | 0.38 | 0.16 | 1.15 | 0.55 |
| 11JY2677 | 郑35                                                                             | 507 | LP   | 1   | 37.83 | 54.01 | 3.84 | 2.82 | 0.46 | 0.26 | 1.43 | 0.73 |
| 11JY2697 | 综31                                                                             | 508 | LP   | 1   | 47.50 | 46.34 | 4.73 | 2.53 | 0.49 | 0.23 | 0.98 | 0.72 |
| 12JY0001 | C5 RIL P2                                                                       | 509 | LP   | 1   | 40.00 | 48.89 | 2.32 | 2.61 | 0.42 | 0.21 | 1.22 | 0.63 |
| 12JY0002 | C5 RIL P1                                                                       | 510 | LP   | 1   | 34.66 | 45.39 | 2.40 | 2.83 | 0.39 | 0.25 | 1.31 | 0.65 |
| 12JY0015 | [(SML*SMQPM)*(MTL*SMQPM)]F1S6-1-25-BB-1-B                                       | 511 | LP   | 1   | 46.33 | 32.73 | 2.55 | 1.71 | 0.34 | 0.14 | 0.71 | 0.48 |
| 12JY0017 | [CML159/[CML159/[MSRXPOOL9]C1F2-205-1(OSU23i)-5-3-X-X-1-BB]F2-3sx]-8-1-1-BB-1-B | 512 | LP   | 1   | 38.33 | 60.06 | 2.80 | 1.91 | 0.42 | 0.23 | 1.57 | 0.65 |

| Seed ID  | Acc                                                                   | Gen | trt. | rep | SL    | RL    | SFW  | RFW  | SDW  | RDW  | RSR  | TDM  |
|----------|-----------------------------------------------------------------------|-----|------|-----|-------|-------|------|------|------|------|------|------|
| 12JY0018 | [CML198/LPSC3H144-1-2-2-2-#-BB]-1-4-1-1-4-B*4-B-B-B                   | 513 | LP   | 1   | 40.33 | 66.06 | 3.37 | 2.93 | 0.41 | 0.28 | 1.64 | 0.69 |
| 12JY0029 | [DTPWC8F31-4-2-1-6/CML444//ZM521B-66-4-1-1-1-BB]-3-2-1-B-B-B          | 514 | LP   | 1   | 27.66 | 53.39 | 1.59 | 1.91 | 0.21 | 0.16 | 1.93 | 0.38 |
| 12JY0040 | 18-599                                                                | 515 | LP   | 1   | 53.33 | 38.73 | 4.26 | 1.89 | 0.58 | 0.25 | 0.73 | 0.83 |
| 12JY0041 | 18-599(RED)                                                           | 516 | LP   | 1   | 39.99 | 35.39 | 3.21 | 1.29 | 0.43 | 0.17 | 0.88 | 0.60 |
| 12JY0108 | CML330                                                                | 517 | LP   | 1   | 32.99 | 68.06 | 1.72 | 2.42 | 0.34 | 0.19 | 2.06 | 0.53 |
| 12JY0122 | CML418                                                                | 518 | LP   | 1   | 37.99 | 40.06 | 2.01 | 1.95 | 0.33 | 0.20 | 1.05 | 0.53 |
| 12JY0146 | CML504                                                                | 519 | LP   | 1   | 34.99 | 65.06 | 1.80 | 1.31 | 0.27 | 0.19 | 1.86 | 0.46 |
| 12JY0156 | Cuba/Guad C3 F53-3-1-1-B-B-B                                          | 520 | LP   | 1   | 43.66 | 54.73 | 3.86 | 2.45 | 0.44 | 0.28 | 1.25 | 0.72 |
| 12JY0164 | ECA-MOROSR( BC1)F2-7-<br>ECAVEE7/PL15QPMC7SRC1F2//POOL15QPMSR-B-4-B-B | 521 | LP   | 1   | 30.99 | 36.73 | 1.58 | 1.24 | 0.24 | 0.12 | 1.18 | 0.36 |
| 12JY0167 | INTA-191-2-1-2-B*8-B-B-B                                              | 522 | LP   | 1   | 38.66 | 30.39 | 1.72 | 1.19 | 0.29 | 0.14 | 0.79 | 0.43 |
| 12JY0173 | La Posta Seq C7-F86-1-1-1-1-B-B-B                                     | 523 | LP   | 1   | 24.49 | 35.39 | 0.96 | 1.26 | 0.20 | 0.10 | 1.44 | 0.30 |
| 12JY0185 | P501SRc0-F2-47-3-1-1-B-B-B-B                                          | 524 | LP   | 1   | 26.99 | 43.06 | 0.21 | 1.16 | 0.15 | 0.11 | 1.60 | 0.27 |
| 12JY0208 | VL05610                                                               | 525 | LP   | 1   | 39.87 | 32.27 | 2.25 | 1.44 | 0.33 | 0.17 | 0.81 | 0.51 |
| 12JY0226 | 178                                                                   | 526 | LP   | 1   | 28.66 | 19.06 | 0.95 | 1.54 | 0.25 | 0.16 | 0.67 | 0.41 |
| 12JY0228 | 273                                                                   | 527 | LP   | 1   | 42.79 | 47.10 | 3.79 | 3.00 | 0.45 | 0.25 | 1.10 | 0.69 |
| 12JY0229 | 288                                                                   | 528 | LP   | 1   | 38.33 | 35.73 | 1.98 | 1.59 | 0.30 | 0.17 | 0.93 | 0.47 |
| 12JY0240 | 764                                                                   | 529 | LP   | 1   | 36.79 | 49.43 | 2.44 | 1.60 | 0.30 | 0.18 | 1.34 | 0.48 |
| 12JY0246 | 6103                                                                  | 530 | LP   | 1   | 36.33 | 33.39 | 3.17 | 2.26 | 0.28 | 0.21 | 0.92 | 0.49 |
| 12JY0252 | 81565                                                                 | 531 | LP   | 1   | 39.54 | 36.93 | 2.88 | 2.01 | 0.34 | 0.21 | 0.93 | 0.55 |
| 12JY0264 | 634-11511                                                             | 532 | LP   | 1   | 43.87 | 45.10 | 4.13 | 1.99 | 0.46 | 0.22 | 1.03 | 0.68 |
| 12JY0265 | 698-1                                                                 | 533 | LP   | 1   | 33.99 | 38.73 | 2.26 | 1.82 | 0.27 | 0.16 | 1.14 | 0.44 |
| 12JY0308 | FAPW                                                                  | 534 | LP   | 1   | 44.74 | 41.81 | 4.72 | 2.63 | 0.46 | 0.28 | 0.93 | 0.73 |
| 12JY0322 | LH132                                                                 | 535 | LP   | 1   | 42.74 | 65.14 | 3.58 | 2.70 | 0.28 | 0.18 | 1.52 | 0.46 |
| 12JY0323 | LH51                                                                  | 536 | LP   | 1   | 36.08 | 34.14 | 3.14 | 2.28 | 0.24 | 0.17 | 0.95 | 0.41 |
| 12JY0325 | LX9801                                                                | 537 | LP   | 1   | 44.08 | 60.48 | 4.60 | 3.48 | 0.35 | 0.22 | 1.37 | 0.57 |
| 12JY0329 | Mo17                                                                  | 538 | LP   | 1   | 37.74 | 27.81 | 2.84 | 2.42 | 0.24 | 0.12 | 0.74 | 0.36 |
| 12JY0347 | R08                                                                   | 539 | LP   | 1   | 39.41 | 50.48 | 2.15 | 1.85 | 0.23 | 0.10 | 1.28 | 0.32 |
| 12JY0349 | RP125                                                                 | 540 | LP   | 1   | 41.66 | 57.98 | 4.41 | 2.94 | 0.41 | 0.26 | 1.39 | 0.67 |
| 12JY0365 | Zhao835                                                               | 541 | LP   | 1   | 42.74 | 42.81 | 5.72 | 3.37 | 0.44 | 0.26 | 1.00 | 0.70 |
| 12JY0370 | 昌7-2                                                                  | 542 | LP   | 1   | 32.37 | 42.60 | 1.96 | 1.12 | 0.25 | 0.11 | 1.32 | 0.37 |
| 12JY0383 | 丹598                                                                  | 543 | LP   | 1   | 44.20 | 42.77 | 3.66 | 2.45 | 0.43 | 0.20 | 0.97 | 0.64 |
| 12JY0401 | 黄早四                                                                   | 544 | LP   | 1   | 31.16 | 38.73 | 2.02 | 1.46 | 0.30 | 0.16 | 1.24 | 0.46 |



| Seed ID  | Acc       | Gen | trt. | rep | SL    | RL    | SFW  | RFW  | SDW  | RDW  | RSR  | TDM  |
|----------|-----------|-----|------|-----|-------|-------|------|------|------|------|------|------|
| 12JY0416 | 吉853      | 545 | LP   | 1   | 34.41 | 48.48 | 2.54 | 1.95 | 0.18 | 0.15 | 1.41 | 0.33 |
| 12JY0443 | 南21-3     | 546 | LP   | 1   | 46.87 | 58.10 | 4.33 | 2.93 | 0.44 | 0.25 | 1.24 | 0.68 |
| 12JY0450 | 齐319      | 547 | LP   | 1   | 46.54 | 51.43 | 4.54 | 3.60 | 0.46 | 0.30 | 1.11 | 0.76 |
| 12JY0457 | 沈5003     | 548 | LP   | 1   | 27.66 | 55.06 | 0.79 | 1.49 | 0.23 | 0.18 | 1.99 | 0.41 |
| 12JY0462 | 四287      | 549 | LP   | 1   | 42.70 | 64.77 | 4.35 | 4.03 | 0.40 | 0.30 | 1.52 | 0.70 |
| 12JY0473 | 铁7922     | 550 | LP   | 1   | 36.41 | 46.14 | 4.39 | 2.27 | 0.28 | 0.19 | 1.27 | 0.47 |
| 11JY1255 | C5 RIL 2  | 1   | LP   | 2   | 34.86 | 59.64 | 3.52 | 4.05 | 0.45 | 0.28 | 1.71 | 0.73 |
| 11JY1256 | C5 RIL 3  | 2   | LP   | 2   | 34.52 | 51.64 | 2.21 | 1.39 | 0.35 | 0.13 | 1.50 | 0.49 |
| 11JY1258 | C5 RIL 5  | 3   | LP   | 2   | 34.19 | 46.98 | 2.94 | 2.19 | 0.36 | 0.15 | 1.37 | 0.51 |
| 11JY1259 | C5 RIL 6  | 4   | LP   | 2   | 40.52 | 47.98 | 3.65 | 2.48 | 0.49 | 0.20 | 1.18 | 0.69 |
| 11JY1262 | C5 RIL 10 | 5   | LP   | 2   | 32.69 | 43.14 | 2.31 | 2.08 | 0.30 | 0.14 | 1.32 | 0.44 |
| 11JY1263 | C5 RIL 11 | 6   | LP   | 2   | 41.19 | 58.64 | 3.32 | 3.47 | 0.44 | 0.24 | 1.42 | 0.68 |
| 11JY1264 | C5 RIL 12 | 7   | LP   | 2   | 35.86 | 64.31 | 2.54 | 2.70 | 0.33 | 0.19 | 1.79 | 0.51 |
| 11JY1267 | C5 RIL 17 | 8   | LP   | 2   | 32.52 | 55.98 | 2.97 | 2.85 | 0.43 | 0.23 | 1.72 | 0.65 |
| 11JY1268 | C5 RIL 18 | 9   | LP   | 2   | 37.86 | 51.31 | 3.86 | 3.18 | 0.49 | 0.22 | 1.36 | 0.71 |
| 11JY1269 | C5 RIL 19 | 10  | LP   | 2   | 32.52 | 43.98 | 4.01 | 4.17 | 0.52 | 0.30 | 1.35 | 0.82 |
| 11JY1271 | C5 RIL 21 | 11  | LP   | 2   | 36.86 | 51.98 | 3.02 | 2.87 | 0.46 | 0.21 | 1.41 | 0.67 |
| 11JY1272 | C5 RIL 24 | 12  | LP   | 2   | 29.52 | 43.31 | 2.56 | 2.43 | 0.36 | 0.19 | 1.47 | 0.55 |
| 11JY1274 | C5 RIL 26 | 13  | LP   | 2   | 32.52 | 54.64 | 3.97 | 3.52 | 0.51 | 0.26 | 1.68 | 0.77 |
| 11JY1275 | C5 RIL 27 | 14  | LP   | 2   | 32.19 | 43.14 | 1.95 | 2.35 | 0.36 | 0.14 | 1.34 | 0.50 |
| 11JY1276 | C5 RIL 28 | 15  | LP   | 2   | 32.19 | 34.31 | 2.35 | 1.31 | 0.36 | 0.13 | 1.07 | 0.49 |
| 11JY1278 | C5 RIL 30 | 16  | LP   | 2   | 29.86 | 46.98 | 2.60 | 2.52 | 0.38 | 0.21 | 1.57 | 0.59 |
| 11JY1279 | C5 RIL 31 | 17  | LP   | 2   | 30.86 | 53.98 | 3.37 | 2.44 | 0.48 | 0.21 | 1.75 | 0.69 |
| 11JY1280 | C5 RIL 32 | 18  | LP   | 2   | 37.52 | 48.98 | 3.67 | 3.00 | 0.53 | 0.27 | 1.31 | 0.80 |
| 11JY1281 | C5 RIL 34 | 19  | LP   | 2   | 29.52 | 39.31 | 2.34 | 2.48 | 0.38 | 0.19 | 1.33 | 0.57 |
| 11JY1282 | C5 RIL 36 | 20  | LP   | 2   | 40.91 | 44.48 | 5.09 | 3.97 | 0.56 | 0.29 | 1.09 | 0.85 |
| 11JY1283 | C5 RIL 38 | 21  | LP   | 2   | 32.24 | 49.81 | 3.03 | 3.22 | 0.34 | 0.21 | 1.54 | 0.55 |
| 11JY1284 | C5 RIL 39 | 22  | LP   | 2   | 35.91 | 42.48 | 2.98 | 2.06 | 0.43 | 0.16 | 1.18 | 0.60 |
| 11JY1285 | C5 RIL 40 | 23  | LP   | 2   | 37.24 | 39.14 | 3.56 | 3.31 | 0.46 | 0.24 | 1.05 | 0.70 |
| 11JY1286 | C5 RIL 41 | 24  | LP   | 2   | 33.91 | 29.81 | 2.33 | 1.89 | 0.32 | 0.14 | 0.88 | 0.46 |
| 11JY1287 | C5 RIL 42 | 25  | LP   | 2   | 33.91 | 48.48 | 3.01 | 2.17 | 0.39 | 0.19 | 1.43 | 0.58 |
| 11JY1288 | C5 RIL 44 | 26  | LP   | 2   | 38.58 | 34.48 | 3.50 | 3.68 | 0.48 | 0.23 | 0.89 | 0.71 |
| 11JY1289 | C5 RIL 45 | 27  | LP   | 2   | 37.24 | 42.48 | 2.85 | 2.09 | 0.40 | 0.19 | 1.14 | 0.60 |
| 11JY1290 | C5 RIL 46 | 28  | LP   | 2   | 34.58 | 40.98 | 2.81 | 2.79 | 0.40 | 0.22 | 1.19 | 0.62 |
| 11JY1292 | C5 RIL 48 | 29  | LP   | 2   | 38.08 | 41.48 | 4.03 | 2.86 | 0.46 | 0.21 | 1.09 | 0.67 |
| 11JY1293 | C5 RIL 49 | 30  | LP   | 2   | 39.58 | 44.81 | 3.21 | 2.96 | 0.50 | 0.27 | 1.13 | 0.77 |

| Seed ID  | Acc        | Gen | trt. | rep | SL    | RL    | SFW  | RFW  | SDW  | RDW  | RSR  | TDM  |
|----------|------------|-----|------|-----|-------|-------|------|------|------|------|------|------|
| 11JY1299 | C5 RIL 57  | 31  | LP   | 2   | 37.24 | 53.81 | 3.40 | 4.36 | 0.46 | 0.30 | 1.44 | 0.76 |
| 11JY1301 | C5 RIL 59  | 32  | LP   | 2   | 33.58 | 44.98 | 2.58 | 3.52 | 0.36 | 0.21 | 1.34 | 0.57 |
| 11JY1305 | C5 RIL 64  | 33  | LP   | 2   | 38.24 | 51.48 | 2.84 | 3.12 | 0.47 | 0.23 | 1.35 | 0.70 |
| 11JY1310 | C5 RIL 68  | 34  | LP   | 2   | 42.91 | 49.48 | 4.65 | 4.84 | 0.54 | 0.34 | 1.15 | 0.88 |
| 11JY1312 | C5 RIL 70  | 35  | LP   | 2   | 30.77 | 54.44 | 2.34 | 2.22 | 0.27 | 0.18 | 1.77 | 0.44 |
| 11JY1315 | C5 RIL 82  | 36  | LP   | 2   | 36.77 | 40.28 | 2.96 | 1.42 | 0.37 | 0.15 | 1.10 | 0.52 |
| 11JY1316 | C5 RIL 74  | 37  | LP   | 2   | 26.10 | 40.11 | 1.49 | 1.77 | 0.24 | 0.16 | 1.54 | 0.40 |
| 11JY1318 | C5 RIL 78  | 38  | LP   | 2   | 29.77 | 44.44 | 1.58 | 1.60 | 0.24 | 0.15 | 1.49 | 0.38 |
| 11JY1319 | C5 RIL 79  | 39  | LP   | 2   | 42.44 | 46.44 | 3.85 | 3.20 | 0.51 | 0.25 | 1.09 | 0.76 |
| 11JY1320 | C5 RIL 80  | 40  | LP   | 2   | 31.27 | 41.28 | 1.24 | 1.73 | 0.20 | 0.16 | 1.32 | 0.35 |
| 11JY1323 | C5 RIL 84  | 41  | LP   | 2   | 33.77 | 51.78 | 2.83 | 2.22 | 0.37 | 0.22 | 1.53 | 0.59 |
| 11JY1324 | C5 RIL 86  | 42  | LP   | 2   | 37.44 | 45.78 | 3.87 | 3.00 | 0.39 | 0.24 | 1.22 | 0.63 |
| 11JY1326 | C5 RIL 88  | 43  | LP   | 2   | 37.10 | 52.78 | 3.59 | 2.81 | 0.46 | 0.23 | 1.42 | 0.69 |
| 11JY1327 | C5 RIL 89  | 44  | LP   | 2   | 31.10 | 40.44 | 0.74 | 0.66 | 0.20 | 0.13 | 1.30 | 0.33 |
| 11JY1328 | C5 RIL 90  | 45  | LP   | 2   | 30.77 | 39.28 | 1.91 | 1.48 | 0.24 | 0.13 | 1.28 | 0.37 |
| 11JY1329 | C5 RIL 92  | 46  | LP   | 2   | 26.27 | 40.28 | 1.69 | 0.94 | 0.27 | 0.14 | 1.53 | 0.41 |
| 11JY1333 | C5 RIL 96  | 47  | LP   | 2   | 46.44 | 53.44 | 5.65 | 4.38 | 0.54 | 0.31 | 1.15 | 0.85 |
| 11JY1334 | C5 RIL 99  | 48  | LP   | 2   | 35.44 | 45.78 | 3.79 | 2.77 | 0.42 | 0.23 | 1.29 | 0.65 |
| 11JY1336 | C5 RIL 102 | 49  | LP   | 2   | 33.10 | 47.11 | 2.26 | 2.05 | 0.38 | 0.34 | 1.42 | 0.72 |
| 11JY1337 | C5 RIL 103 | 50  | LP   | 2   | 31.10 | 38.11 | 3.00 | 2.06 | 0.39 | 0.18 | 1.23 | 0.58 |
| 11JY1339 | C5 RIL 106 | 51  | LP   | 2   | 37.44 | 40.44 | 3.80 | 2.85 | 0.43 | 0.23 | 1.08 | 0.66 |
| 11JY1341 | C5 RIL 108 | 52  | LP   | 2   | 32.24 | 56.73 | 2.65 | 3.31 | 0.32 | 0.25 | 1.76 | 0.57 |
| 11JY1349 | C5 RIL 119 | 53  | LP   | 2   | 33.24 | 39.73 | 3.23 | 2.42 | 0.37 | 0.22 | 1.19 | 0.59 |
| 11JY1350 | C5 RIL 120 | 54  | LP   | 2   | 34.24 | 44.06 | 2.90 | 2.53 | 0.31 | 0.18 | 1.29 | 0.49 |
| 11JY1351 | C5 RIL 121 | 55  | LP   | 2   | 29.24 | 51.73 | 2.17 | 3.18 | 0.24 | 0.23 | 1.77 | 0.47 |
| 11JY1352 | C5 RIL 122 | 56  | LP   | 2   | 39.91 | 65.73 | 5.57 | 4.24 | 0.39 | 0.20 | 1.65 | 0.59 |
| 11JY1354 | C5 RIL 124 | 57  | LP   | 2   | 39.24 | 47.39 | 3.64 | 2.26 | 0.44 | 0.20 | 1.21 | 0.63 |
| 11JY1356 | C5 RIL 126 | 58  | LP   | 2   | 34.24 | 54.73 | 3.06 | 2.21 | 0.36 | 0.19 | 1.60 | 0.55 |
| 11JY1357 | C5 RIL 128 | 59  | LP   | 2   | 33.24 | 50.06 | 2.95 | 1.84 | 0.36 | 0.18 | 1.51 | 0.54 |
| 11JY1360 | C5 RIL 131 | 60  | LP   | 2   | 35.58 | 53.73 | 3.62 | 2.21 | 0.44 | 0.24 | 1.51 | 0.68 |
| 11JY1362 | C5 RIL 133 | 61  | LP   | 2   | 32.24 | 48.73 | 2.99 | 1.57 | 0.32 | 0.17 | 1.51 | 0.49 |
| 11JY1363 | C5 RIL 134 | 62  | LP   | 2   | 44.58 | 69.06 | 6.48 | 4.45 | 0.72 | 0.32 | 1.55 | 1.04 |
| 11JY1364 | C5 RIL 135 | 63  | LP   | 2   | 33.58 | 45.73 | 2.87 | 2.17 | 0.33 | 0.18 | 1.36 | 0.51 |
| 11JY1365 | C5 RIL 137 | 64  | LP   | 2   | 34.24 | 55.23 | 2.76 | 2.31 | 0.33 | 0.16 | 1.61 | 0.50 |
| 11JY1366 | C5 RIL 138 | 65  | LP   | 2   | 33.24 | 56.06 | 3.17 | 2.65 | 0.39 | 0.21 | 1.69 | 0.60 |
| 11JY1367 | C5 RIL 139 | 66  | LP   | 2   | 36.24 | 52.73 | 3.52 | 2.32 | 0.41 | 0.21 | 1.45 | 0.63 |

| Seed ID  | Acc        | Gen | trt. | rep | SL    | RL    | SFW  | RFW  | SDW  | RDW  | RSR  | TDM  |
|----------|------------|-----|------|-----|-------|-------|------|------|------|------|------|------|
| 11JY1368 | C5 RIL 140 | 67  | LP   | 2   | 35.91 | 43.39 | 3.15 | 2.14 | 0.38 | 0.20 | 1.21 | 0.58 |
| 11JY1369 | C5 RIL 141 | 68  | LP   | 2   | 37.58 | 54.73 | 4.44 | 2.75 | 0.49 | 0.19 | 1.46 | 0.68 |
| 11JY1370 | C5 RIL 142 | 69  | LP   | 2   | 32.58 | 45.39 | 3.89 | 1.71 | 0.39 | 0.15 | 1.39 | 0.54 |
| 11JY1372 | C5 RIL 144 | 70  | LP   | 2   | 38.24 | 59.06 | 4.51 | 3.51 | 0.57 | 0.28 | 1.54 | 0.85 |
| 11JY1374 | C5 RIL 146 | 71  | LP   | 2   | 32.41 | 69.14 | 3.53 | 4.24 | 0.35 | 0.29 | 2.13 | 0.64 |
| 11JY1376 | C5 RIL 150 | 72  | LP   | 2   | 38.08 | 66.14 | 4.64 | 4.66 | 0.41 | 0.29 | 1.74 | 0.70 |
| 11JY1377 | C5 RIL 151 | 73  | LP   | 2   | 37.53 | 52.95 | 1.73 | 1.20 | 0.18 | 0.14 | 1.41 | 0.32 |
| 11JY1378 | C5 RIL 152 | 74  | LP   | 2   | 32.50 | 47.30 | 1.71 | 1.33 | 0.20 | 0.16 | 1.46 | 0.36 |
| 11JY1379 | C5 RIL 153 | 75  | LP   | 2   | 35.60 | 40.20 | 2.31 | 1.58 | 0.24 | 0.14 | 1.13 | 0.38 |
| 11JY1382 | C5 RIL 156 | 76  | LP   | 2   | 32.50 | 40.60 | 2.11 | 0.93 | 0.23 | 0.14 | 1.25 | 0.37 |
| 11JY1383 | C5 RIL 157 | 77  | LP   | 2   | 38.27 | 42.73 | 2.43 | 1.28 | 0.24 | 0.14 | 1.12 | 0.38 |
| 11JY1384 | C5 RIL 158 | 78  | LP   | 2   | 36.50 | 63.65 | 2.58 | 1.55 | 0.32 | 0.19 | 1.74 | 0.51 |
| 11JY1385 | C5 RIL 159 | 79  | LP   | 2   | 25.20 | 34.50 | 1.10 | 0.64 | 0.10 | 0.08 | 1.37 | 0.18 |
| 11JY1387 | C5 RIL 161 | 80  | LP   | 2   | 35.70 | 45.23 | 2.32 | 1.47 | 0.22 | 0.16 | 1.27 | 0.38 |
| 11JY1388 | C5 RIL 162 | 81  | LP   | 2   | 32.50 | 41.00 | 1.17 | 0.87 | 0.13 | 0.10 | 1.26 | 0.23 |
| 11JY1389 | C5 RIL 163 | 82  | LP   | 2   | 46.45 | 55.75 | 4.20 | 3.16 | 0.38 | 0.31 | 1.20 | 0.69 |
| 11JY1391 | C5 RIL 165 | 83  | LP   | 2   | 40.00 | 41.20 | 2.53 | 1.40 | 0.29 | 0.20 | 1.03 | 0.49 |
| 11JY1394 | C5 RIL 169 | 84  | LP   | 2   | 31.80 | 40.00 | 1.26 | 0.60 | 0.15 | 0.12 | 1.26 | 0.27 |
| 11JY1396 | C5 RIL 171 | 85  | LP   | 2   | 36.70 | 42.30 | 2.91 | 1.64 | 0.28 | 0.21 | 1.15 | 0.49 |
| 11JY1397 | C5 RIL 172 | 86  | LP   | 2   | 35.87 | 49.40 | 1.88 | 1.59 | 0.21 | 0.16 | 1.38 | 0.37 |
| 11JY1399 | C5 RIL 174 | 87  | LP   | 2   | 40.00 | 39.60 | 3.76 | 2.30 | 0.38 | 0.36 | 0.99 | 0.74 |
| 11JY1400 | C5 RIL 176 | 88  | LP   | 2   | 37.87 | 35.20 | 3.38 | 2.60 | 0.33 | 0.24 | 0.93 | 0.57 |
| 11JY1401 | C5 RIL 177 | 89  | LP   | 2   | 38.55 | 61.15 | 3.40 | 3.63 | 0.33 | 0.30 | 1.59 | 0.63 |
| 11JY1402 | C5 RIL 178 | 90  | LP   | 2   | 34.27 | 50.00 | 2.97 | 2.69 | 0.30 | 0.23 | 1.46 | 0.53 |
| 11JY1404 | C5 RIL 182 | 91  | LP   | 2   | 35.33 | 48.10 | 3.36 | 2.26 | 0.35 | 0.27 | 1.36 | 0.62 |
| 11JY1405 | C5 RIL 183 | 92  | LP   | 2   | 35.33 | 48.10 | 3.36 | 2.26 | 0.35 | 0.27 | 1.36 | 0.62 |
| 11JY1406 | C5 RIL 184 | 93  | LP   | 2   | 32.30 | 51.50 | 2.01 | 1.92 | 0.23 | 0.14 | 1.59 | 0.37 |
| 11JY1409 | C5 RIL 187 | 94  | LP   | 2   | 29.00 | 37.70 | 1.75 | 1.93 | 0.22 | 0.20 | 1.30 | 0.42 |
| 11JY1410 | C5 RIL 188 | 95  | LP   | 2   | 28.80 | 46.00 | 2.02 | 1.72 | 0.22 | 0.20 | 1.60 | 0.42 |
| 11JY1412 | C5 RIL 191 | 96  | LP   | 2   | 38.47 | 71.00 | 3.38 | 2.95 | 0.38 | 0.32 | 1.85 | 0.70 |
| 11JY1413 | C5 RIL 192 | 97  | LP   | 2   | 38.65 | 38.25 | 1.63 | 1.10 | 0.19 | 0.21 | 0.99 | 0.40 |
| 11JY1414 | C5 RIL 193 | 98  | LP   | 2   | 29.50 | 44.43 | 1.48 | 1.40 | 0.20 | 0.20 | 1.51 | 0.40 |
| 11JY1416 | C5 RIL 195 | 99  | LP   | 2   | 28.00 | 32.30 | 2.00 | 1.08 | 0.27 | 0.23 | 1.15 | 0.50 |
| 11JY1418 | C5 RIL 198 | 100 | LP   | 2   | 31.30 | 55.70 | 2.55 | 2.06 | 0.32 | 0.28 | 1.78 | 0.60 |
| 11JY1420 | C5 RIL 200 | 101 | LP   | 2   | 31.10 | 28.47 | 2.43 | 1.36 | 0.30 | 0.22 | 0.92 | 0.52 |
| 11JY1421 | C5 RIL 203 | 102 | LP   | 2   | 28.60 | 42.30 | 1.61 | 0.98 | 0.18 | 0.15 | 1.48 | 0.33 |

| Seed ID  | Acc        | Gen | trt. | rep | SL    | RL    | SFW  | RFW  | SDW  | RDW  | RSR  | TDM  |
|----------|------------|-----|------|-----|-------|-------|------|------|------|------|------|------|
| 11JY1422 | C5 RIL 204 | 103 | LP   | 2   | 30.20 | 38.80 | 1.41 | 0.63 | 0.66 | 0.19 | 1.28 | 0.85 |
| 11JY1423 | C5 RIL 205 | 104 | LP   | 2   | 40.10 | 61.10 | 1.53 | 2.35 | 0.32 | 0.25 | 1.52 | 0.57 |
| 11JY1424 | C5 RIL 206 | 105 | LP   | 2   | 34.70 | 69.50 | 2.21 | 1.98 | 0.25 | 0.22 | 2.00 | 0.47 |
| 11JY1425 | C5 RIL 207 | 106 | LP   | 2   | 43.60 | 47.40 | 3.64 | 2.26 | 0.42 | 0.40 | 1.09 | 0.82 |
| 11JY1426 | C5 RIL 208 | 107 | LP   | 2   | 43.60 | 47.40 | 3.64 | 2.26 | 0.42 | 0.40 | 1.09 | 0.82 |
| 11JY1428 | C5 RIL 210 | 108 | LP   | 2   | 30.35 | 49.50 | 2.46 | 2.26 | 0.26 | 0.28 | 1.63 | 0.54 |
| 11JY1429 | C5 RIL 211 | 109 | LP   | 2   | 29.33 | 34.73 | 1.67 | 1.88 | 0.33 | 0.23 | 1.18 | 0.56 |
| 11JY1429 | C5 RIL 211 | 110 | LP   | 2   | 36.60 | 45.70 | 2.10 | 1.89 | 0.26 | 0.18 | 1.25 | 0.44 |
| 11JY1431 | C5 RIL 214 | 111 | LP   | 2   | 31.60 | 47.00 | 2.21 | 2.27 | 0.24 | 0.22 | 1.49 | 0.46 |
| 11JY1433 | C5 RIL 216 | 112 | LP   | 2   | 24.30 | 35.60 | 1.16 | 0.53 | 0.15 | 0.12 | 1.47 | 0.27 |
| 11JY1434 | C5 RIL 217 | 113 | LP   | 2   | 38.30 | 37.50 | 4.41 | 1.95 | 0.48 | 0.42 | 0.98 | 0.90 |
| 11JY1435 | C5 RIL 218 | 114 | LP   | 2   | 37.20 | 63.50 | 3.24 | 2.63 | 0.39 | 0.21 | 1.71 | 0.60 |
| 11JY1437 | C5 RIL 220 | 115 | LP   | 2   | 32.73 | 45.97 | 2.04 | 1.82 | 0.20 | 0.19 | 1.40 | 0.39 |
| 11JY1440 | C5 RIL 225 | 116 | LP   | 2   | 29.70 | 48.95 | 2.20 | 2.00 | 0.22 | 0.16 | 1.65 | 0.38 |
| 11JY1442 | C5 RIL 227 | 117 | LP   | 2   | 31.00 | 42.43 | 2.14 | 2.08 | 0.23 | 0.16 | 1.37 | 0.39 |
| 11JY1444 | C5 RIL 229 | 118 | LP   | 2   | 36.90 | 60.60 | 2.92 | 2.43 | 0.26 | 0.22 | 1.64 | 0.48 |
| 11JY1454 | C5 RIL 240 | 119 | LP   | 2   | 35.50 | 52.40 | 3.33 | 3.01 | 0.38 | 0.31 | 1.48 | 0.69 |
| 11JY1455 | C5 RIL 241 | 120 | LP   | 2   | 28.40 | 36.37 | 1.32 | 1.32 | 0.30 | 0.12 | 1.28 | 0.42 |
| 11JY1456 | C5 RIL 243 | 121 | LP   | 2   | 29.00 | 42.45 | 1.66 | 0.94 | 0.23 | 0.17 | 1.46 | 0.40 |
| 11JY1459 | C5 RIL P2  | 122 | LP   | 2   | 33.80 | 52.40 | 3.19 | 1.45 | 0.30 | 0.24 | 1.55 | 0.54 |
| 11JY1460 | C5 RIL P1  | 123 | LP   | 2   | 31.80 | 37.50 | 1.37 | 0.60 | 0.15 | 0.11 | 1.18 | 0.26 |
| 11JY1461 | C6 RIL 3   | 124 | LP   | 2   | 43.67 | 25.30 | 2.76 | 1.61 | 0.21 | 0.14 | 0.58 | 0.35 |
| 11JY1462 | C6 RIL 14  | 125 | LP   | 2   | 52.17 | 58.53 | 4.64 | 3.08 | 0.39 | 0.21 | 1.12 | 0.60 |
| 11JY1463 | C6 RIL 23  | 126 | LP   | 2   | 34.67 | 32.67 | 1.67 | 1.50 | 0.19 | 0.13 | 0.94 | 0.32 |
| 11JY1464 | C6 RIL 24  | 127 | LP   | 2   | 35.33 | 32.67 | 2.03 | 1.48 | 0.29 | 0.19 | 0.92 | 0.48 |
| 11JY1465 | C6 RIL 25  | 128 | LP   | 2   | 40.33 | 50.00 | 3.10 | 2.95 | 0.36 | 0.27 | 1.24 | 0.63 |
| 11JY1466 | C6 RIL 29  | 129 | LP   | 2   | 32.67 | 37.67 | 1.84 | 2.12 | 0.25 | 0.20 | 1.15 | 0.45 |
| 11JY1468 | C6 RIL 144 | 130 | LP   | 2   | 33.00 | 46.00 | 1.45 | 1.32 | 0.22 | 0.13 | 1.39 | 0.35 |
| 11JY1469 | C6 RIL 203 | 131 | LP   | 2   | 37.33 | 48.00 | 2.39 | 2.49 | 0.27 | 0.19 | 1.29 | 0.46 |
| 11JY1470 | C6 RIL 212 | 132 | LP   | 2   | 34.00 | 30.00 | 1.71 | 1.25 | 0.20 | 0.13 | 0.88 | 0.33 |
| 11JY1472 | C6 RIL 219 | 133 | LP   | 2   | 35.00 | 39.00 | 1.80 | 1.74 | 0.22 | 0.15 | 1.11 | 0.37 |
| 11JY1473 | C6 RIL 239 | 134 | LP   | 2   | 41.40 | 51.40 | 3.74 | 2.82 | 0.45 | 0.31 | 1.24 | 0.76 |
| 11JY1474 | C6 RIL 243 | 135 | LP   | 2   | 38.53 | 39.53 | 2.99 | 2.21 | 0.36 | 0.22 | 1.03 | 0.58 |
| 11JY1475 | C6 RIL 272 | 136 | LP   | 2   | 54.83 | 66.83 | 7.52 | 3.83 | 0.54 | 0.22 | 1.22 | 0.76 |
| 11JY1476 | C6 RIL 273 | 137 | LP   | 2   | 37.93 | 39.43 | 2.83 | 1.72 | 0.38 | 0.28 | 1.04 | 0.66 |
| 11JY1477 | C6 RIL 283 | 138 | LP   | 2   | 39.47 | 45.10 | 2.18 | 1.21 | 0.31 | 0.20 | 1.14 | 0.51 |

| Seed ID  | Acc        | Gen | trt. | rep | SL    | RL    | SFW  | RFW  | SDW  | RDW  | RSR  | TDM  |
|----------|------------|-----|------|-----|-------|-------|------|------|------|------|------|------|
| 11JY1478 | C6 RIL 293 | 139 | LP   | 2   | 37.73 | 39.50 | 2.23 | 1.14 | 0.34 | 0.25 | 1.05 | 0.59 |
| 11JY1479 | C6 RIL 298 | 140 | LP   | 2   | 35.70 | 29.80 | 2.96 | 0.90 | 0.42 | 0.22 | 0.83 | 0.64 |
| 11JY1480 | C6 RIL 303 | 141 | LP   | 2   | 35.13 | 23.13 | 2.47 | 0.74 | 0.34 | 0.19 | 0.66 | 0.53 |
| 11JY1481 | C6 RIL 327 | 142 | LP   | 2   | 48.60 | 35.30 | 3.68 | 2.78 | 0.41 | 0.33 | 0.73 | 0.74 |
| 11JY1482 | C6 RIL 341 | 143 | LP   | 2   | 31.60 | 24.80 | 2.16 | 1.67 | 0.26 | 0.17 | 0.78 | 0.43 |
| 11JY1483 | C6 RIL 348 | 144 | LP   | 2   | 17.90 | 44.50 | 1.15 | 0.54 | 0.16 | 0.10 | 2.49 | 0.26 |
| 11JY1484 | C6 RIL 402 | 145 | LP   | 2   | 33.80 | 31.45 | 2.42 | 1.32 | 0.28 | 0.19 | 0.93 | 0.47 |
| 11JY1485 | C6 RIL 403 | 146 | LP   | 2   | 34.45 | 43.10 | 2.29 | 1.76 | 0.29 | 0.23 | 1.25 | 0.52 |
| 11JY1487 | C6 RIL 5   | 147 | LP   | 2   | 48.40 | 30.63 | 3.99 | 2.07 | 0.35 | 0.14 | 0.63 | 0.49 |
| 11JY1488 | C6 RIL 7   | 148 | LP   | 2   | 40.00 | 51.80 | 5.00 | 3.18 | 0.51 | 0.42 | 1.30 | 0.93 |
| 11JY1489 | C6 RIL 10  | 149 | LP   | 2   | 37.90 | 37.70 | 3.18 | 1.71 | 0.36 | 0.23 | 0.99 | 0.59 |
| 11JY1490 | C6 RIL 15  | 150 | LP   | 2   | 44.57 | 48.43 | 3.71 | 2.79 | 0.41 | 0.28 | 1.09 | 0.69 |
| 11JY1491 | C6 RIL 19  | 151 | LP   | 2   | 40.40 | 56.70 | 3.03 | 2.98 | 0.34 | 0.26 | 1.40 | 0.60 |
| 11JY1493 | C6 RIL 21  | 152 | LP   | 2   | 37.73 | 34.07 | 3.22 | 2.47 | 0.34 | 0.22 | 0.90 | 0.56 |
| 11JY1494 | C6 RIL 23  | 153 | LP   | 2   | 37.87 | 50.80 | 2.70 | 2.58 | 0.30 | 0.22 | 1.34 | 0.52 |
| 11JY1495 | C6 RIL 24  | 154 | LP   | 2   | 38.33 | 39.13 | 3.55 | 3.17 | 0.39 | 0.29 | 1.02 | 0.68 |
| 11JY1496 | C6 RIL 25  | 155 | LP   | 2   | 42.37 | 47.00 | 2.69 | 3.15 | 0.33 | 0.27 | 1.11 | 0.60 |
| 11JY1497 | C6 RIL 28  | 156 | LP   | 2   | 26.00 | 28.50 | 1.00 | 0.59 | 0.11 | 0.08 | 1.10 | 0.19 |
| 11JY1498 | C6 RIL 29  | 157 | LP   | 2   | 45.20 | 53.67 | 3.84 | 4.20 | 0.39 | 0.35 | 1.19 | 0.74 |
| 11JY1499 | C6 RIL 30  | 158 | LP   | 2   | 53.70 | 36.63 | 6.22 | 3.57 | 0.68 | 0.30 | 0.68 | 0.98 |
| 11JY1500 | C6 RIL 31  | 159 | LP   | 2   | 39.45 | 56.70 | 4.56 | 2.67 | 0.56 | 0.35 | 1.44 | 0.91 |
| 11JY1501 | C6 RIL 32  | 160 | LP   | 2   | 35.67 | 37.80 | 1.64 | 0.98 | 0.21 | 0.13 | 1.06 | 0.34 |
| 11JY1502 | C6 RIL 33  | 161 | LP   | 2   | 36.80 | 34.50 | 2.48 | 1.43 | 0.31 | 0.20 | 0.94 | 0.51 |
| 11JY1503 | C6 RIL 36  | 162 | LP   | 2   | 37.10 | 29.67 | 1.96 | 1.90 | 0.36 | 0.33 | 0.80 | 0.69 |
| 11JY1504 | C6 RIL 39  | 163 | LP   | 2   | 31.70 | 39.10 | 1.93 | 1.88 | 0.25 | 0.20 | 1.23 | 0.45 |
| 11JY1505 | C6 RIL 40  | 164 | LP   | 2   | 32.83 | 31.37 | 1.96 | 1.14 | 0.23 | 0.15 | 0.96 | 0.38 |
| 11JY1506 | C6 RIL 42  | 165 | LP   | 2   | 33.47 | 33.77 | 2.65 | 2.16 | 0.39 | 0.25 | 1.01 | 0.64 |
| 11JY1508 | C6 RIL 47  | 166 | LP   | 2   | 41.00 | 46.63 | 2.86 | 1.95 | 0.32 | 0.22 | 1.14 | 0.54 |
| 11JY1509 | C6 RIL 49  | 167 | LP   | 2   | 29.80 | 32.50 | 1.75 | 1.00 | 0.21 | 0.13 | 1.09 | 0.34 |
| 11JY1510 | C6 RIL 50  | 168 | LP   | 2   | 34.90 | 53.57 | 2.86 | 1.81 | 0.33 | 0.27 | 1.53 | 0.60 |
| 11JY1511 | C6 RIL 52  | 169 | LP   | 2   | 36.47 | 22.63 | 2.12 | 1.87 | 0.25 | 0.14 | 0.62 | 0.39 |
| 11JY1512 | C6 RIL 53  | 170 | LP   | 2   | 29.65 | 39.00 | 1.27 | 0.69 | 0.16 | 0.10 | 1.32 | 0.26 |
| 11JY1513 | C6 RIL 57  | 171 | LP   | 2   | 37.00 | 39.20 | 2.84 | 2.12 | 0.35 | 0.25 | 1.06 | 0.60 |
| 11JY1514 | C6 RIL 58  | 172 | LP   | 2   | 45.50 | 26.20 | 4.68 | 3.36 | 0.55 | 0.36 | 0.58 | 0.91 |
| 11JY1515 | C6 RIL 59  | 173 | LP   | 2   | 31.00 | 33.55 | 1.42 | 0.77 | 0.20 | 0.13 | 1.08 | 0.33 |
| 11JY1516 | C6 RIL 60  | 174 | LP   | 2   | 30.20 | 36.30 | 1.33 | 1.07 | 0.19 | 0.12 | 1.20 | 0.31 |

| Seed ID  | Acc        | Gen | trt. | rep | SL    | RL    | SFW  | RFW  | SDW  | RDW  | RSR  | TDM  |
|----------|------------|-----|------|-----|-------|-------|------|------|------|------|------|------|
| 11JY1517 | C6 RIL 64  | 175 | LP   | 2   | 36.80 | 35.90 | 1.97 | 1.12 | 0.23 | 0.15 | 0.98 | 0.38 |
| 11JY1518 | C6 RIL 65  | 176 | LP   | 2   | 35.53 | 28.67 | 1.74 | 1.11 | 0.24 | 0.18 | 0.81 | 0.42 |
| 11JY1519 | C6 RIL 66  | 177 | LP   | 2   | 31.10 | 39.40 | 1.29 | 0.85 | 0.20 | 0.14 | 1.27 | 0.34 |
| 11JY1520 | C6 RIL 68  | 178 | LP   | 2   | 37.35 | 29.65 | 2.14 | 0.83 | 0.29 | 0.16 | 0.79 | 0.45 |
| 11JY1521 | C6 RIL 69  | 179 | LP   | 2   | 41.15 | 38.55 | 2.40 | 1.51 | 0.29 | 0.22 | 0.94 | 0.51 |
| 11JY1522 | C6 RIL 70  | 180 | LP   | 2   | 26.66 | 40.33 | 3.97 | 2.82 | 0.31 | 0.17 | 1.51 | 0.48 |
| 11JY1523 | C6 RIL 72  | 181 | LP   | 2   | 37.45 | 48.10 | 2.40 | 1.74 | 0.29 | 0.24 | 1.28 | 0.53 |
| 11JY1524 | C6 RIL 74  | 182 | LP   | 2   | 35.95 | 40.85 | 1.70 | 1.32 | 0.23 | 0.18 | 1.14 | 0.41 |
| 11JY1525 | C6 RIL 76  | 183 | LP   | 2   | 29.43 | 36.40 | 1.44 | 0.84 | 0.23 | 0.16 | 1.24 | 0.39 |
| 11JY1527 | C6 RIL 79  | 184 | LP   | 2   | 30.53 | 30.83 | 1.44 | 0.93 | 0.21 | 0.15 | 1.01 | 0.36 |
| 11JY1528 | C6 RIL 83  | 185 | LP   | 2   | 43.27 | 31.06 | 3.03 | 2.22 | 0.33 | 0.21 | 0.72 | 0.54 |
| 11JY1529 | C6 RIL 85  | 186 | LP   | 2   | 38.55 | 44.70 | 2.47 | 1.41 | 0.34 | 0.23 | 1.16 | 0.57 |
| 11JY1530 | C6 RIL 86  | 187 | LP   | 2   | 30.47 | 29.23 | 1.15 | 0.82 | 0.18 | 0.12 | 0.96 | 0.30 |
| 11JY1531 | C6 RIL 91  | 188 | LP   | 2   | 44.83 | 33.50 | 3.25 | 1.83 | 0.44 | 0.29 | 0.75 | 0.73 |
| 11JY1532 | C6 RIL 94  | 189 | LP   | 2   | 44.17 | 36.67 | 3.25 | 0.80 | 0.36 | 0.15 | 0.83 | 0.51 |
| 11JY1533 | C6 RIL 95  | 190 | LP   | 2   | 21.09 | 45.95 | 1.50 | 0.83 | 0.23 | 0.17 | 2.18 | 0.40 |
| 11JY1534 | C6 RIL 97  | 191 | LP   | 2   | 44.37 | 58.30 | 4.75 | 4.28 | 0.38 | 0.30 | 1.31 | 0.68 |
| 11JY1535 | C6 RIL 103 | 192 | LP   | 2   | 42.80 | 49.90 | 1.95 | 0.78 | 0.28 | 0.19 | 1.17 | 0.47 |
| 11JY1536 | C6 RIL 104 | 193 | LP   | 2   | 34.35 | 36.80 | 1.63 | 0.59 | 0.20 | 0.14 | 1.07 | 0.34 |
| 11JY1537 | C6 RIL 107 | 194 | LP   | 2   | 39.00 | 35.20 | 2.06 | 0.74 | 0.27 | 0.18 | 0.90 | 0.45 |
| 11JY1538 | C6 RIL 108 | 195 | LP   | 2   | 46.87 | 33.93 | 3.25 | 0.86 | 0.46 | 0.24 | 0.72 | 0.70 |
| 11JY1539 | C6 RIL 109 | 196 | LP   | 2   | 37.10 | 34.67 | 1.92 | 0.79 | 0.24 | 0.14 | 0.93 | 0.38 |
| 11JY1540 | C6 RIL 112 | 197 | LP   | 2   | 34.77 | 33.03 | 1.40 | 0.52 | 0.16 | 0.12 | 0.95 | 0.28 |
| 11JY1541 | C6 RIL 113 | 198 | LP   | 2   | 47.37 | 37.27 | 4.15 | 1.63 | 0.48 | 0.30 | 0.79 | 0.78 |
| 11JY1542 | C6 RIL 115 | 199 | LP   | 2   | 46.93 | 26.33 | 3.09 | 0.76 | 0.41 | 0.16 | 0.56 | 0.57 |
| 11JY1543 | C6 RIL 116 | 200 | LP   | 2   | 45.20 | 47.30 | 2.42 | 0.67 | 0.24 | 0.11 | 1.05 | 0.35 |
| 11JY1544 | C6 RIL 117 | 201 | LP   | 2   | 43.77 | 49.47 | 2.95 | 1.07 | 0.30 | 0.21 | 1.13 | 0.51 |
| 11JY1545 | C6 RIL 120 | 202 | LP   | 2   | 57.00 | 56.50 | 4.87 | 2.30 | 0.41 | 0.21 | 0.99 | 0.62 |
| 11JY1546 | C6 RIL 121 | 203 | LP   | 2   | 39.47 | 34.43 | 2.01 | 0.62 | 0.29 | 0.16 | 0.87 | 0.45 |
| 11JY1547 | C6 RIL 123 | 204 | LP   | 2   | 43.40 | 37.83 | 3.27 | 1.20 | 0.36 | 0.25 | 0.87 | 0.61 |
| 11JY1548 | C6 RIL 124 | 205 | LP   | 2   | 36.67 | 30.80 | 1.38 | 0.45 | 0.22 | 0.14 | 0.84 | 0.36 |
| 11JY1549 | C6 RIL 127 | 206 | LP   | 2   | 39.13 | 37.23 | 2.03 | 0.69 | 0.27 | 0.14 | 0.95 | 0.41 |
| 11JY1550 | C6 RIL 131 | 207 | LP   | 2   | 26.60 | 48.50 | 0.91 | 0.82 | 0.13 | 0.12 | 1.82 | 0.25 |
| 11JY1551 | C6 RIL 134 | 208 | LP   | 2   | 48.20 | 44.90 | 3.74 | 2.26 | 0.46 | 0.27 | 0.93 | 0.73 |
| 11JY1552 | C6 RIL 135 | 209 | LP   | 2   | 36.73 | 54.83 | 3.01 | 1.78 | 0.35 | 0.21 | 1.49 | 0.56 |
| 11JY1553 | C6 RIL 138 | 210 | LP   | 2   | 46.37 | 42.90 | 3.03 | 1.15 | 0.41 | 0.21 | 0.93 | 0.62 |

| Seed ID  | Acc        | Gen | trt. | rep | SL    | RL    | SFW  | RFW  | SDW  | RDW  | RSR  | TDM  |
|----------|------------|-----|------|-----|-------|-------|------|------|------|------|------|------|
| 11JY1554 | C6 RIL 139 | 211 | LP   | 2   | 35.40 | 39.80 | 1.52 | 0.81 | 0.18 | 0.12 | 1.12 | 0.30 |
| 11JY1555 | C6 RIL 140 | 212 | LP   | 2   | 36.65 | 33.85 | 1.63 | 0.55 | 0.19 | 0.11 | 0.92 | 0.30 |
| 11JY1556 | C6 RIL 141 | 213 | LP   | 2   | 40.87 | 50.43 | 3.03 | 2.43 | 0.36 | 0.18 | 1.23 | 0.54 |
| 11JY1557 | C6 RIL 142 | 214 | LP   | 2   | 41.73 | 46.53 | 3.08 | 1.49 | 0.38 | 0.22 | 1.12 | 0.60 |
| 11JY1558 | C6 RIL 143 | 215 | LP   | 2   | 50.85 | 44.10 | 4.35 | 2.77 | 0.43 | 0.23 | 0.87 | 0.66 |
| 11JY1560 | C6 RIL 146 | 216 | LP   | 2   | 45.17 | 40.37 | 3.14 | 1.99 | 0.31 | 0.18 | 0.89 | 0.49 |
| 11JY1561 | C6 RIL 147 | 217 | LP   | 2   | 21.20 | 25.50 | 0.71 | 0.50 | 0.07 | 0.06 | 1.20 | 0.13 |
| 11JY1562 | C6 RIL 148 | 218 | LP   | 2   | 36.55 | 40.05 | 2.10 | 1.44 | 0.23 | 0.14 | 1.10 | 0.37 |
| 11JY1563 | C6 RIL 150 | 219 | LP   | 2   | 21.70 | 30.20 | 1.20 | 0.90 | 0.10 | 0.07 | 1.39 | 0.17 |
| 11JY1565 | C6 RIL 153 | 220 | LP   | 2   | 32.50 | 43.55 | 2.31 | 2.46 | 0.26 | 0.19 | 1.34 | 0.45 |
| 11JY1566 | C6 RIL 156 | 221 | LP   | 2   | 33.30 | 54.40 | 1.77 | 1.68 | 0.26 | 0.18 | 1.63 | 0.44 |
| 11JY1567 | C6 RIL 160 | 222 | LP   | 2   | 42.03 | 33.63 | 2.99 | 1.62 | 0.31 | 0.18 | 0.80 | 0.49 |
| 11JY1568 | C6 RIL 161 | 223 | LP   | 2   | 35.45 | 39.60 | 2.08 | 1.64 | 0.23 | 0.16 | 1.12 | 0.39 |
| 11JY1569 | C6 RIL 162 | 224 | LP   | 2   | 49.80 | 37.67 | 5.84 | 4.16 | 0.51 | 0.32 | 0.76 | 0.83 |
| 11JY1570 | C6 RIL 163 | 225 | LP   | 2   | 38.77 | 45.40 | 2.56 | 1.30 | 0.29 | 0.19 | 1.17 | 0.48 |
| 11JY1571 | C6 RIL 164 | 226 | LP   | 2   | 37.65 | 33.00 | 2.36 | 0.87 | 0.54 | 0.16 | 0.88 | 0.70 |
| 11JY1572 | C6 RIL 169 | 227 | LP   | 2   | 31.05 | 28.95 | 1.15 | 0.61 | 0.15 | 0.09 | 0.93 | 0.24 |
| 11JY1573 | C6 RIL 171 | 228 | LP   | 2   | 44.70 | 23.80 | 3.00 | 1.12 | 0.37 | 0.21 | 0.53 | 0.58 |
| 11JY1574 | C6 RIL 172 | 229 | LP   | 2   | 37.90 | 47.25 | 2.22 | 1.51 | 0.29 | 0.24 | 1.25 | 0.53 |
| 11JY1576 | C6 RIL 174 | 230 | LP   | 2   | 50.80 | 37.50 | 2.91 | 1.36 | 0.33 | 0.18 | 0.74 | 0.51 |
| 11JY1577 | C6 RIL 175 | 231 | LP   | 2   | 41.40 | 42.30 | 2.40 | 0.79 | 0.31 | 0.19 | 1.02 | 0.50 |
| 11JY1578 | C6 RIL 176 | 232 | LP   | 2   | 50.20 | 31.20 | 3.70 | 1.03 | 0.48 | 0.25 | 0.62 | 0.73 |
| 11JY1579 | C6 RIL 179 | 233 | LP   | 2   | 33.80 | 30.30 | 1.68 | 0.71 | 0.18 | 0.12 | 0.90 | 0.30 |
| 11JY1580 | C6 RIL 181 | 234 | LP   | 2   | 38.80 | 29.15 | 2.57 | 0.84 | 0.30 | 0.14 | 0.75 | 0.44 |
| 11JY1581 | C6 RIL 184 | 235 | LP   | 2   | 33.40 | 27.30 | 2.70 | 1.41 | 0.08 | 0.04 | 0.82 | 0.12 |
| 11JY1582 | C6 RIL 186 | 236 | LP   | 2   | 44.47 | 40.20 | 4.44 | 4.07 | 0.47 | 0.31 | 0.90 | 0.78 |
| 11JY1583 | C6 RIL 187 | 237 | LP   | 2   | 38.25 | 35.30 | 2.28 | 0.62 | 0.30 | 0.16 | 0.92 | 0.46 |
| 11JY1584 | C6 RIL 188 | 238 | LP   | 2   | 32.93 | 39.50 | 1.66 | 0.59 | 0.20 | 0.13 | 1.20 | 0.33 |
| 11JY1585 | C6 RIL 189 | 239 | LP   | 2   | 21.10 | 25.50 | 0.82 | 0.49 | 0.13 | 0.10 | 1.21 | 0.23 |
| 11JY1586 | C6 RIL 190 | 240 | LP   | 2   | 40.90 | 36.97 | 2.23 | 0.78 | 0.28 | 0.15 | 0.90 | 0.43 |
| 11JY1587 | C6 RIL 192 | 241 | LP   | 2   | 38.00 | 36.30 | 2.20 | 0.45 | 0.25 | 0.20 | 0.96 | 0.45 |
| 11JY1588 | C6 RIL 193 | 242 | LP   | 2   | 42.30 | 50.25 | 2.29 | 0.78 | 0.28 | 0.21 | 1.19 | 0.49 |
| 11JY1589 | C6 RIL 203 | 243 | LP   | 2   | 44.67 | 50.10 | 2.74 | 0.58 | 0.29 | 0.18 | 1.12 | 0.47 |
| 11JY1590 | C6 RIL 204 | 244 | LP   | 2   | 43.00 | 39.45 | 2.47 | 0.94 | 0.30 | 0.25 | 0.92 | 0.55 |
| 11JY1591 | C6 RIL 205 | 245 | LP   | 2   | 35.57 | 37.63 | 1.28 | 0.36 | 0.15 | 0.13 | 1.06 | 0.28 |
| 11JY1592 | C6 RIL 206 | 246 | LP   | 2   | 37.45 | 44.15 | 1.46 | 0.71 | 0.18 | 0.10 | 1.18 | 0.28 |

| Seed ID  | Acc        | Gen | trt. | rep | SL    | RL    | SFW  | RFW  | SDW  | RDW  | RSR  | TDM  |
|----------|------------|-----|------|-----|-------|-------|------|------|------|------|------|------|
| 11JY1593 | C6 RIL 207 | 247 | LP   | 2   | 34.70 | 46.17 | 2.73 | 2.16 | 0.30 | 0.16 | 1.33 | 0.46 |
| 11JY1594 | C6 RIL 211 | 248 | LP   | 2   | 36.43 | 34.30 | 1.74 | 0.82 | 0.18 | 0.12 | 0.94 | 0.30 |
| 11JY1595 | C6 RIL 212 | 249 | LP   | 2   | 41.50 | 47.50 | 2.44 | 1.19 | 0.22 | 0.15 | 1.14 | 0.37 |
| 11JY1596 | C6 RIL 217 | 250 | LP   | 2   | 36.00 | 24.20 | 1.52 | 0.50 | 0.18 | 0.11 | 0.67 | 0.29 |
| 11JY1597 | C6 RIL 218 | 251 | LP   | 2   | 45.73 | 42.27 | 3.14 | 1.36 | 0.30 | 0.16 | 0.92 | 0.46 |
| 11JY1598 | C6 RIL 219 | 252 | LP   | 2   | 45.65 | 45.45 | 3.02 | 1.37 | 0.34 | 0.18 | 1.00 | 0.52 |
| 11JY1599 | C6 RIL 220 | 253 | LP   | 2   | 36.40 | 49.70 | 1.95 | 0.50 | 0.23 | 0.17 | 1.37 | 0.40 |
| 11JY1600 | C6 RIL 225 | 254 | LP   | 2   | 45.47 | 33.57 | 4.61 | 2.58 | 0.42 | 0.23 | 0.74 | 0.65 |
| 11JY1601 | C6 RIL 230 | 255 | LP   | 2   | 38.77 | 60.07 | 2.78 | 2.74 | 0.36 | 0.25 | 1.55 | 0.61 |
| 11JY1602 | C6 RIL 231 | 256 | LP   | 2   | 45.97 | 26.87 | 3.22 | 2.49 | 0.41 | 0.24 | 0.58 | 0.65 |
| 11JY1603 | C6 RIL 232 | 257 | LP   | 2   | 40.90 | 44.75 | 2.94 | 2.81 | 0.36 | 0.24 | 1.09 | 0.60 |
| 11JY1604 | C6 RIL 234 | 258 | LP   | 2   | 55.00 | 62.27 | 6.06 | 5.68 | 0.59 | 0.35 | 1.13 | 0.94 |
| 11JY1605 | C6 RIL 235 | 259 | LP   | 2   | 51.73 | 55.60 | 4.49 | 4.59 | 0.49 | 0.32 | 1.07 | 0.81 |
| 11JY1606 | C6 RIL 236 | 260 | LP   | 2   | 38.60 | 43.20 | 2.97 | 2.71 | 0.36 | 0.20 | 1.12 | 0.56 |
| 11JY1607 | C6 RIL 238 | 261 | LP   | 2   | 43.97 | 44.20 | 3.72 | 2.74 | 0.40 | 0.23 | 1.01 | 0.63 |
| 11JY1608 | C6 RIL 239 | 262 | LP   | 2   | 42.60 | 24.70 | 1.92 | 0.45 | 0.18 | 0.11 | 0.58 | 0.29 |
| 11JY1609 | C6 RIL 241 | 263 | LP   | 2   | 49.90 | 57.87 | 3.53 | 3.62 | 0.40 | 0.26 | 1.16 | 0.66 |
| 11JY1610 | C6 RIL 243 | 264 | LP   | 2   | 47.03 | 67.97 | 3.85 | 4.05 | 0.44 | 0.31 | 1.45 | 0.75 |
| 11JY1611 | C6 RIL 245 | 265 | LP   | 2   | 41.83 | 51.57 | 3.09 | 2.04 | 0.34 | 0.16 | 1.23 | 0.50 |
| 11JY1612 | C6 RIL 249 | 266 | LP   | 2   | 29.63 | 29.80 | 1.12 | 0.86 | 0.13 | 0.06 | 1.01 | 0.19 |
| 11JY1613 | C6 RIL 253 | 267 | LP   | 2   | 50.30 | 55.00 | 5.57 | 3.57 | 0.58 | 0.27 | 1.09 | 0.85 |
| 11JY1614 | C6 RIL 258 | 268 | LP   | 2   | 38.25 | 48.25 | 2.81 | 2.72 | 0.32 | 0.20 | 1.26 | 0.52 |
| 11JY1616 | C6 RIL 261 | 269 | LP   | 2   | 35.20 | 40.47 | 2.22 | 1.76 | 0.17 | 0.13 | 1.15 | 0.30 |
| 11JY1617 | C6 RIL 262 | 270 | LP   | 2   | 39.57 | 30.47 | 3.81 | 2.30 | 0.22 | 0.10 | 0.77 | 0.32 |
| 11JY1619 | C6 RIL 265 | 271 | LP   | 2   | 45.93 | 53.33 | 3.74 | 2.46 | 0.42 | 0.20 | 1.16 | 0.62 |
| 11JY1620 | C6 RIL 267 | 272 | LP   | 2   | 46.47 | 52.60 | 4.11 | 2.50 | 0.43 | 0.21 | 1.13 | 0.64 |
| 11JY1621 | C6 RIL 268 | 273 | LP   | 2   | 47.27 | 65.07 | 4.67 | 2.77 | 0.42 | 0.20 | 1.38 | 0.62 |
| 11JY1622 | C6 RIL 270 | 274 | LP   | 2   | 40.03 | 49.93 | 2.91 | 3.09 | 0.31 | 0.21 | 1.25 | 0.52 |
| 11JY1623 | C6 RIL 272 | 275 | LP   | 2   | 53.23 | 63.93 | 3.93 | 3.25 | 0.41 | 0.25 | 1.20 | 0.66 |
| 11JY1624 | C6 RIL 273 | 276 | LP   | 2   | 46.67 | 44.00 | 4.90 | 2.29 | 0.48 | 0.19 | 0.94 | 0.67 |
| 11JY1625 | C6 RIL 275 | 277 | LP   | 2   | 44.73 | 33.07 | 5.20 | 3.25 | 0.50 | 0.27 | 0.74 | 0.77 |
| 11JY1626 | C6 RIL 276 | 278 | LP   | 2   | 38.10 | 43.90 | 2.94 | 2.47 | 0.36 | 0.22 | 1.15 | 0.58 |
| 11JY1627 | C6 RIL 282 | 279 | LP   | 2   | 48.47 | 35.77 | 3.97 | 3.19 | 0.51 | 0.31 | 0.74 | 0.82 |
| 11JY1628 | C6 RIL 283 | 280 | LP   | 2   | 49.33 | 30.90 | 3.71 | 2.53 | 0.42 | 0.22 | 0.63 | 0.64 |
| 11JY1629 | C6 RIL 284 | 281 | LP   | 2   | 48.00 | 37.28 | 4.63 | 3.46 | 0.49 | 0.24 | 0.78 | 0.73 |
| 11JY1630 | C6 RIL 286 | 282 | LP   | 2   | 36.67 | 41.20 | 2.86 | 3.06 | 0.34 | 0.27 | 1.12 | 0.61 |



| Seed ID  | Acc        | Gen | trt. | rep | SL    | RL    | SFW  | RFW  | SDW  | RDW  | RSR  | TDM  |
|----------|------------|-----|------|-----|-------|-------|------|------|------|------|------|------|
| 11JY1631 | C6 RIL 287 | 283 | LP   | 2   | 43.57 | 60.93 | 3.53 | 2.63 | 0.40 | 0.20 | 1.40 | 0.60 |
| 11JY1632 | C6 RIL 288 | 284 | LP   | 2   | 42.60 | 33.55 | 2.79 | 0.89 | 0.20 | 0.08 | 0.79 | 0.28 |
| 11JY1633 | C6 RIL 289 | 285 | LP   | 2   | 44.13 | 33.97 | 3.79 | 2.72 | 0.38 | 0.22 | 0.77 | 0.60 |
| 11JY1634 | C6 RIL 291 | 286 | LP   | 2   | 45.50 | 60.20 | 3.57 | 3.16 | 0.40 | 0.24 | 1.32 | 0.64 |
| 11JY1635 | C6 RIL 292 | 287 | LP   | 2   | 36.07 | 15.10 | 2.23 | 1.82 | 0.27 | 0.18 | 0.42 | 0.45 |
| 11JY1636 | C6 RIL 293 | 288 | LP   | 2   | 47.00 | 52.10 | 4.05 | 3.41 | 0.48 | 0.29 | 1.11 | 0.77 |
| 11JY1637 | C6 RIL 295 | 289 | LP   | 2   | 40.07 | 39.00 | 3.59 | 2.11 | 0.39 | 0.19 | 0.97 | 0.58 |
| 11JY1638 | C6 RIL 297 | 290 | LP   | 2   | 35.60 | 30.20 | 2.80 | 1.71 | 0.30 | 0.15 | 0.85 | 0.45 |
| 11JY1639 | C6 RIL 298 | 291 | LP   | 2   | 43.20 | 38.67 | 4.56 | 3.92 | 0.47 | 0.27 | 0.90 | 0.74 |
| 11JY1640 | C6 RIL 300 | 292 | LP   | 2   | 38.13 | 35.93 | 3.53 | 1.96 | 0.34 | 0.17 | 0.94 | 0.51 |
| 11JY1641 | C6 RIL 303 | 293 | LP   | 2   | 40.83 | 29.70 | 3.37 | 2.27 | 0.32 | 0.16 | 0.73 | 0.48 |
| 11JY1642 | C6 RIL 310 | 294 | LP   | 2   | 50.00 | 58.90 | 4.32 | 3.40 | 0.39 | 0.25 | 1.18 | 0.64 |
| 11JY1643 | C6 RIL 314 | 295 | LP   | 2   | 38.70 | 29.40 | 1.99 | 0.69 | 0.14 | 0.50 | 0.76 | 0.64 |
| 11JY1644 | C6 RIL 315 | 296 | LP   | 2   | 52.90 | 38.93 | 6.27 | 4.04 | 0.62 | 0.36 | 0.74 | 0.98 |
| 11JY1645 | C6 RIL 316 | 297 | LP   | 2   | 25.40 | 42.20 | 1.46 | 0.82 | 0.11 | 0.07 | 1.66 | 0.18 |
| 11JY1646 | C6 RIL 317 | 298 | LP   | 2   | 32.23 | 37.13 | 1.64 | 1.29 | 0.19 | 0.11 | 1.15 | 0.30 |
| 11JY1647 | C6 RIL 318 | 299 | LP   | 2   | 36.10 | 39.93 | 2.72 | 2.68 | 0.27 | 0.19 | 1.11 | 0.46 |
| 11JY1648 | C6 RIL 319 | 300 | LP   | 2   | 33.00 | 30.00 | 2.46 | 1.76 | 0.26 | 0.13 | 0.91 | 0.39 |
| 11JY1649 | C6 RIL 320 | 301 | LP   | 2   | 38.57 | 54.87 | 2.97 | 3.04 | 0.37 | 0.27 | 1.42 | 0.64 |
| 11JY1650 | C6 RIL 321 | 302 | LP   | 2   | 39.70 | 35.35 | 3.05 | 1.94 | 0.14 | 0.08 | 0.89 | 0.22 |
| 11JY1651 | C6 RIL 322 | 303 | LP   | 2   | 39.37 | 37.07 | 4.02 | 2.27 | 0.45 | 0.23 | 0.94 | 0.68 |
| 11JY1652 | C6 RIL 324 | 304 | LP   | 2   | 34.20 | 42.37 | 3.49 | 3.62 | 0.37 | 0.25 | 1.24 | 0.62 |
| 11JY1653 | C6 RIL 327 | 305 | LP   | 2   | 54.63 | 41.67 | 5.45 | 3.89 | 0.51 | 0.31 | 0.76 | 0.82 |
| 11JY1654 | C6 RIL 328 | 306 | LP   | 2   | 50.83 | 53.23 | 3.53 | 2.04 | 0.32 | 0.15 | 1.05 | 0.47 |
| 11JY1655 | C6 RIL 330 | 307 | LP   | 2   | 45.83 | 45.67 | 4.32 | 3.40 | 0.37 | 0.21 | 1.00 | 0.58 |
| 11JY1656 | C6 RIL 332 | 308 | LP   | 2   | 56.80 | 59.47 | 6.58 | 4.84 | 0.50 | 0.30 | 1.05 | 0.80 |
| 11JY1657 | C6 RIL 333 | 309 | LP   | 2   | 44.30 | 32.80 | 2.60 | 1.73 | 0.28 | 0.17 | 0.74 | 0.45 |
| 11JY1658 | C6 RIL 335 | 310 | LP   | 2   | 37.50 | 41.50 | 1.69 | 2.10 | 0.28 | 0.19 | 1.11 | 0.47 |
| 11JY1659 | C6 RIL 336 | 311 | LP   | 2   | 35.00 | 32.00 | 2.17 | 2.87 | 0.26 | 0.21 | 0.91 | 0.47 |
| 11JY1660 | C6 RIL 339 | 312 | LP   | 2   | 31.17 | 38.33 | 2.25 | 1.80 | 0.25 | 0.15 | 1.23 | 0.40 |
| 11JY1661 | C6 RIL 340 | 313 | LP   | 2   | 31.67 | 28.33 | 1.60 | 1.35 | 0.24 | 0.12 | 0.89 | 0.36 |
| 11JY1662 | C6 RIL 341 | 314 | LP   | 2   | 42.00 | 36.00 | 2.28 | 2.38 | 0.31 | 0.26 | 0.86 | 0.57 |
| 11JY1663 | C6 RIL 342 | 315 | LP   | 2   | 32.67 | 53.00 | 1.84 | 1.50 | 0.20 | 0.14 | 1.62 | 0.34 |
| 11JY1664 | C6 RIL 344 | 316 | LP   | 2   | 35.33 | 26.33 | 2.13 | 1.69 | 0.25 | 0.20 | 0.75 | 0.45 |
| 11JY1665 | C6 RIL 346 | 317 | LP   | 2   | 48.93 | 35.60 | 4.10 | 2.07 | 0.38 | 0.21 | 0.73 | 0.59 |
| 11JY1666 | C6 RIL 347 | 318 | LP   | 2   | 40.00 | 57.67 | 2.77 | 1.67 | 0.34 | 0.18 | 1.44 | 0.52 |

| Seed ID  | Acc                                                                                        | Gen | trt. | rep | SL    | RL    | SFW  | RFW  | SDW  | RDW  | RSR  | TDM  |
|----------|--------------------------------------------------------------------------------------------|-----|------|-----|-------|-------|------|------|------|------|------|------|
| 11JY1667 | C6 RIL 349                                                                                 | 319 | LP   | 2   | 36.00 | 38.00 | 2.25 | 2.43 | 0.29 | 0.18 | 1.06 | 0.47 |
| 11JY1668 | C6 RIL 352                                                                                 | 320 | LP   | 2   | 31.00 | 46.00 | 1.36 | 1.27 | 0.18 | 0.11 | 1.48 | 0.29 |
| 11JY1669 | C6 RIL 354                                                                                 | 321 | LP   | 2   | 26.00 | 23.00 | 0.74 | 0.63 | 0.22 | 0.13 | 0.88 | 0.35 |
| 11JY1670 | C6 RIL 355                                                                                 | 322 | LP   | 2   | 28.67 | 42.00 | 1.32 | 0.92 | 0.19 | 0.12 | 1.46 | 0.31 |
| 11JY1671 | C6 RIL 356                                                                                 | 323 | LP   | 2   | 38.67 | 36.00 | 2.49 | 2.56 | 0.30 | 0.20 | 0.93 | 0.50 |
| 11JY1672 | C6 RIL 358                                                                                 | 324 | LP   | 2   | 32.50 | 51.00 | 1.86 | 2.22 | 0.21 | 0.16 | 1.57 | 0.37 |
| 11JY1673 | C6 RIL 361                                                                                 | 325 | LP   | 2   | 23.67 | 34.00 | 1.01 | 1.09 | 0.18 | 0.13 | 1.44 | 0.31 |
| 11JY1674 | C6 RIL 362                                                                                 | 326 | LP   | 2   | 47.00 | 55.33 | 4.75 | 2.32 | 0.44 | 0.20 | 1.18 | 0.64 |
| 11JY1675 | C6 RIL 364                                                                                 | 327 | LP   | 2   | 44.00 | 56.00 | 3.60 | 2.05 | 0.37 | 0.21 | 1.27 | 0.58 |
| 11JY1676 | C6 RIL 366                                                                                 | 328 | LP   | 2   | 46.87 | 34.90 | 4.27 | 2.49 | 0.38 | 0.18 | 0.74 | 0.56 |
| 11JY1677 | C6 RIL 368                                                                                 | 329 | LP   | 2   | 35.67 | 39.67 | 1.95 | 1.37 | 0.24 | 0.13 | 1.11 | 0.37 |
| 11JY1678 | C6 RIL 372                                                                                 | 330 | LP   | 2   | 43.67 | 49.00 | 3.13 | 2.01 | 0.36 | 0.19 | 1.12 | 0.55 |
| 11JY1680 | C6 RIL 379                                                                                 | 331 | LP   | 2   | 34.33 | 37.33 | 1.65 | 1.24 | 0.19 | 0.11 | 1.09 | 0.30 |
| 11JY1682 | C6 RIL 382                                                                                 | 332 | LP   | 2   | 42.67 | 42.00 | 3.88 | 2.91 | 0.42 | 0.26 | 0.98 | 0.68 |
| 11JY1683 | C6 RIL 388                                                                                 | 333 | LP   | 2   | 38.33 | 46.00 | 2.21 | 2.18 | 0.29 | 0.19 | 1.20 | 0.48 |
| 11JY1684 | C6 RIL 391                                                                                 | 334 | LP   | 2   | 39.00 | 36.00 | 3.19 | 2.93 | 0.35 | 0.23 | 0.92 | 0.58 |
| 11JY1686 | C6 RIL 394                                                                                 | 335 | LP   | 2   | 44.33 | 54.67 | 3.56 | 3.50 | 0.38 | 0.24 | 1.23 | 0.62 |
| 11JY1687 | C6 RIL 395                                                                                 | 336 | LP   | 2   | 45.00 | 38.00 | 3.91 | 3.87 | 0.43 | 0.27 | 0.84 | 0.70 |
| 11JY1688 | C6 RIL 398                                                                                 | 337 | LP   | 2   | 45.00 | 53.67 | 3.96 | 3.59 | 0.41 | 0.27 | 1.19 | 0.68 |
| 11JY1689 | C6 RIL 400                                                                                 | 338 | LP   | 2   | 36.33 | 41.67 | 1.61 | 1.39 | 0.20 | 0.13 | 1.15 | 0.33 |
| 11JY2045 | (CUBA/GUAD C1 F27-4-3-3-B-1-Bx[KILIMA ST94A]-30/MSV-03-2-10-B-2-B-B)-160-1-B-3-B           | 339 | LP   | 2   | 39.08 | 56.06 | 3.19 | 1.77 | 0.30 | 0.17 | 1.43 | 0.47 |
| 11JY2047 | [[MSRXPOOL9]C1F2-176-4-7-X-1-B/CML206]-5-2-3-1-BBBBB-B-B-B                                 | 340 | LP   | 2   | 46.24 | 61.89 | 4.47 | 2.81 | 0.49 | 0.29 | 1.34 | 0.78 |
| 11JY2051 | [CML199/[EV7992#/EV8449-SR]C1F2-334-1(OSU8i)-6-3-Sn]-B-23-2-2-B*4-B-B-B                    | 341 | LP   | 2   | 26.91 | 39.14 | 0.96 | 1.00 | 0.21 | 0.07 | 1.45 | 0.28 |
| 11JY2052 | [CML312/[TUXPSEQ]C1F2/P49-SR]F2-45-3-2-1-BB//INTA-F2-192-2-1-1-1-BBBB]-1-5-1-1-1-BBB-B-B-B | 342 | LP   | 2   | 34.24 | 44.39 | 2.73 | 1.56 | 0.30 | 0.17 | 1.30 | 0.46 |
| 11JY2053 | [CML312/CML445/[TUXPSEQ]C1F2/P49-SR]F2-45-3-2-1-BBB]-1-2-1-1-2-BBB-B-B-B                   | 343 | LP   | 2   | 28.24 | 35.14 | 1.96 | 1.01 | 0.26 | 0.08 | 1.24 | 0.34 |
| 11JY2054 | [CML312/MAS[MSR/312]-109-3]-B-71-3-BBB-B-B-B                                               | 344 | LP   | 2   | 42.08 | 32.06 | 3.02 | 1.72 | 0.35 | 0.16 | 0.76 | 0.51 |
| 11JY2055 | [CML389/CML176]-B-29-2-2-B*5                                                               | 345 | LP   | 2   | 38.41 | 62.39 | 4.11 | 2.78 | 0.40 | 0.27 | 1.62 | 0.67 |

| Seed ID  | Acc                                                                                                   | Gen | trt. | rep | SL    | RL    | SFW  | RFW  | SDW  | RDW  | RSR  | TDM  |
|----------|-------------------------------------------------------------------------------------------------------|-----|------|-----|-------|-------|------|------|------|------|------|------|
| 11JY2056 | [CML395/CML440//[LPSC3H144-1-2-2-4-#-BB/SC/ZM605#b-19-2-X]-1-2-X-1-1-BB]-1-2-1-1-B]-3-2-1-1-BBB-B-B-B | 346 | LP   | 2   | 34.74 | 54.89 | 3.13 | 2.13 | 0.31 | 0.22 | 1.58 | 0.52 |
| 11JY2060 | [CML444/ZSR923S4BULK-2-2-X-X-X-X-1-BB]-1-1-1-2/CML441]-1-1-1-2-BBB-B-B-B                              | 347 | LP   | 2   | 40.24 | 62.81 | 4.91 | 3.09 | 0.62 | 0.35 | 1.56 | 0.96 |
| 11JY2061 | [DRB-F2-180-2/DRB-3-4-1]-X-6-1-3-BB-2-BBBBBB-B-B-B                                                    | 348 | LP   | 2   | 28.58 | 48.48 | 2.10 | 1.78 | 0.28 | 0.15 | 1.70 | 0.43 |
| 11JY2063 | [DTPWC8F31-4-2-1-6-B2/CML395//[CML445/ZM621B]-2-1-2-3-1-BB]-3-2-1-1-1-2-B-B-B                         | 349 | LP   | 2   | 42.74 | 50.39 | 3.69 | 2.02 | 0.41 | 0.23 | 1.18 | 0.63 |
| 11JY2064 | [Ent320:92SEW2-77/[DMRESR-W]EarlySel-#I-2-4-B/CML386]-B-11-3-B-2-#-B*4                                | 350 | LP   | 2   | 29.24 | 49.81 | 1.85 | 1.90 | 0.28 | 0.15 | 1.70 | 0.43 |
| 11JY2065 | [LZ956441/LZ966205]-B-3-4-4-B-5-BBBBB-B-B-B                                                           | 351 | LP   | 2   | 38.24 | 62.14 | 3.92 | 4.19 | 0.50 | 0.33 | 1.62 | 0.84 |
| 11JY2066 | [MSRXPOOL9]C1F2-205-1(OSU23i)-5-3-X-X-1-B//EV7992/EV8449...-3-2-2-1-BBBBB-B-B-B                       | 352 | LP   | 2   | 25.24 | 30.14 | 1.48 | 1.36 | 0.17 | 0.05 | 1.19 | 0.23 |
| 11JY2067 | [SYN-USAB2/SYN-ELIB2]-12-1-1-1-B*4-B-B-B                                                              | 353 | LP   | 2   | 42.41 | 55.06 | 3.64 | 2.23 | 0.40 | 0.21 | 1.30 | 0.61 |
| 11JY2070 | 02SADVE2B-#-42-1-1-1-1-B-B-B                                                                          | 354 | LP   | 2   | 33.24 | 56.48 | 3.01 | 2.01 | 0.33 | 0.19 | 1.70 | 0.52 |
| 11JY2071 | 02SADVL2B-#-16-2-1-B-B-B                                                                              | 355 | LP   | 2   | 30.58 | 55.48 | 2.03 | 2.62 | 0.29 | 0.23 | 1.81 | 0.52 |
| 11JY2075 | 20V-18                                                                                                | 356 | LP   | 2   | 35.91 | 38.81 | 2.82 | 2.37 | 0.45 | 0.27 | 1.08 | 0.72 |
| 11JY2076 | 622016-ZCN-2                                                                                          | 357 | LP   | 2   | 45.58 | 39.48 | 4.57 | 3.47 | 0.47 | 0.31 | 0.87 | 0.78 |
| 11JY2078 | 761BB2 BCox751B-B-1-1-B-B-B-B-B                                                                       | 358 | LP   | 2   | 42.24 | 46.39 | 3.59 | 2.87 | 0.44 | 0.26 | 1.10 | 0.69 |
| 11JY2079 | BRAZ 2309                                                                                             | 359 | LP   | 2   | 41.08 | 40.73 | 2.61 | 1.95 | 0.32 | 0.15 | 0.99 | 0.47 |
| 11JY2081 | CL-04934 (P49C2H12-5-4xP23C2-11-1)-2-2-2-B*10                                                         | 360 | LP   | 2   | 32.74 | 33.73 | 3.41 | 2.67 | 0.36 | 0.25 | 1.03 | 0.61 |
| 11JY2083 | CML103                                                                                                | 361 | LP   | 2   | 40.24 | 64.14 | 2.84 | 2.38 | 0.41 | 0.29 | 1.59 | 0.70 |
| 11JY2085 | CML114                                                                                                | 362 | LP   | 2   | 43.24 | 44.89 | 4.27 | 3.37 | 0.50 | 0.33 | 1.04 | 0.83 |
| 11JY2086 | CML115                                                                                                | 363 | LP   | 2   | 43.41 | 57.39 | 4.27 | 3.37 | 0.45 | 0.39 | 1.32 | 0.84 |
| 11JY2087 | CML116                                                                                                | 364 | LP   | 2   | 37.58 | 40.48 | 2.50 | 1.37 | 0.26 | 0.12 | 1.08 | 0.38 |
| 11JY2088 | CML118                                                                                                | 365 | LP   | 2   | 37.91 | 56.81 | 3.35 | 2.51 | 0.40 | 0.28 | 1.50 | 0.68 |
| 11JY2090 | CML127                                                                                                | 366 | LP   | 2   | 33.58 | 53.81 | 2.87 | 2.48 | 0.30 | 0.16 | 1.60 | 0.45 |
| 11JY2091 | CML130                                                                                                | 367 | LP   | 2   | 31.91 | 45.14 | 1.20 | 1.11 | 0.18 | 0.09 | 1.41 | 0.26 |
| 11JY2092 | CML133                                                                                                | 368 | LP   | 2   | 37.24 | 57.48 | 2.77 | 3.91 | 0.38 | 0.33 | 1.54 | 0.70 |
| 11JY2093 | CML134                                                                                                | 369 | LP   | 2   | 33.24 | 39.14 | 1.79 | 1.13 | 0.29 | 0.15 | 1.18 | 0.45 |
| 11JY2094 | CML135                                                                                                | 370 | LP   | 2   | 29.58 | 43.48 | 2.92 | 3.68 | 0.40 | 0.33 | 1.47 | 0.73 |
| 11JY2102 | CML169                                                                                                | 371 | LP   | 2   | 33.58 | 38.68 | 2.43 | 1.45 | 0.41 | 0.13 | 1.15 | 0.55 |
| 11JY2103 | CML170                                                                                                | 372 | LP   | 2   | 42.91 | 58.68 | 3.92 | 4.17 | 0.41 | 0.29 | 1.37 | 0.70 |
| 11JY2107 | CML192                                                                                                | 373 | LP   | 2   | 45.58 | 43.34 | 4.81 | 3.25 | 0.45 | 0.22 | 0.95 | 0.67 |

| Seed ID  | Acc                                                             | Gen | trt. | rep | SL    | RL    | SFW  | RFW  | SDW  | RDW  | RSR  | TDM  |
|----------|-----------------------------------------------------------------|-----|------|-----|-------|-------|------|------|------|------|------|------|
| 11JY2108 | CML20                                                           | 374 | LP   | 2   | 45.41 | 44.06 | 4.23 | 2.48 | 0.44 | 0.23 | 0.97 | 0.67 |
| 11JY2109 | CML202                                                          | 375 | LP   | 2   | 38.58 | 55.34 | 3.73 | 2.61 | 0.38 | 0.22 | 1.43 | 0.60 |
| 11JY2110 | CML206                                                          | 376 | LP   | 2   | 41.91 | 52.01 | 4.56 | 3.09 | 0.48 | 0.28 | 1.24 | 0.77 |
| 11JY2112 | CML226                                                          | 377 | LP   | 2   | 32.24 | 40.34 | 2.05 | 1.15 | 0.24 | 0.09 | 1.25 | 0.34 |
| 11JY2114 | CML229                                                          | 378 | LP   | 2   | 40.74 | 37.73 | 4.06 | 2.31 | 0.40 | 0.22 | 0.93 | 0.62 |
| 11JY2117 | CML283                                                          | 379 | LP   | 2   | 40.00 | 44.01 | 3.20 | 2.09 | 0.34 | 0.18 | 1.10 | 0.52 |
| 11JY2122 | CML290                                                          | 380 | LP   | 2   | 29.74 | 38.39 | 2.25 | 1.69 | 0.24 | 0.21 | 1.29 | 0.44 |
| 11JY2125 | CML304                                                          | 381 | LP   | 2   | 39.58 | 40.01 | 4.40 | 3.49 | 0.45 | 0.22 | 1.01 | 0.68 |
| 11JY2126 | CML31                                                           | 382 | LP   | 2   | 38.58 | 49.68 | 3.21 | 2.19 | 0.35 | 0.20 | 1.29 | 0.55 |
| 11JY2127 | CML311/MBR C3 BC F23-1-2-1-B-B-B                                | 383 | LP   | 2   | 39.91 | 56.34 | 4.08 | 3.02 | 0.41 | 0.22 | 1.41 | 0.63 |
| 11JY2128 | CML311/MBR C3 BC F3-1-1-1-B-B-B                                 | 384 | LP   | 2   | 53.24 | 59.01 | 6.14 | 4.17 | 0.58 | 0.37 | 1.11 | 0.95 |
| 11JY2129 | CML311/MBR C3 BC F3-1-1-2-B-B                                   | 385 | LP   | 2   | 43.08 | 45.06 | 3.72 | 1.87 | 0.39 | 0.18 | 1.05 | 0.58 |
| 11JY2132 | CML311/MBR C3 BC F43-2-1-1-B-B-B                                | 386 | LP   | 2   | 44.91 | 68.68 | 5.29 | 3.81 | 0.49 | 0.31 | 1.53 | 0.80 |
| 11JY2133 | CML311/MBR C3 BC F65-1-2-2-B-B-B                                | 387 | LP   | 2   | 40.58 | 60.34 | 4.03 | 3.43 | 0.39 | 0.26 | 1.49 | 0.65 |
| 11JY2134 | CML311/MBR C3 BC F95-2-2-1-B-B-B                                | 388 | LP   | 2   | 46.58 | 66.01 | 4.71 | 3.86 | 0.45 | 0.28 | 1.42 | 0.73 |
| 11JY2136 | CML312SR                                                        | 389 | LP   | 2   | 40.24 | 63.68 | 3.71 | 2.94 | 0.36 | 0.24 | 1.58 | 0.60 |
| 11JY2137 | CML312SRQ=[[(CLQ-RCWQ83xCML312SR)xCML312SR]xCML312SR)]-15-1-BBB | 390 | LP   | 2   | 46.24 | 53.68 | 4.57 | 3.47 | 0.80 | 0.27 | 1.16 | 1.07 |
| 11JY2140 | CML322                                                          | 391 | LP   | 2   | 39.58 | 48.34 | 3.73 | 2.80 | 0.39 | 0.20 | 1.22 | 0.60 |
| 11JY2141 | CML323                                                          | 392 | LP   | 2   | 51.91 | 53.68 | 5.99 | 3.93 | 0.61 | 0.29 | 1.03 | 0.90 |
| 11JY2142 | CML325                                                          | 393 | LP   | 2   | 41.24 | 69.01 | 4.76 | 4.61 | 0.50 | 0.40 | 1.67 | 0.91 |
| 11JY2144 | CML328                                                          | 394 | LP   | 2   | 37.91 | 51.68 | 4.47 | 3.12 | 0.43 | 0.21 | 1.36 | 0.64 |
| 11JY2146 | CML338                                                          | 395 | LP   | 2   | 46.58 | 57.14 | 4.58 | 3.46 | 0.47 | 0.28 | 1.23 | 0.75 |
| 11JY2147 | CML360                                                          | 396 | LP   | 2   | 47.91 | 48.48 | 5.41 | 3.36 | 0.51 | 0.26 | 1.01 | 0.78 |
| 11JY2148 | CML361                                                          | 397 | LP   | 2   | 44.24 | 44.48 | 3.90 | 2.69 | 0.38 | 0.20 | 1.01 | 0.58 |
| 11JY2149 | CML364                                                          | 398 | LP   | 2   | 37.34 | 49.98 | 4.16 | 2.14 | 0.39 | 0.17 | 1.34 | 0.56 |
| 11JY2150 | CML380xMBR/MDR C3 BC F21-1-1-2-B-B-B-3-1-B-B-B                  | 399 | LP   | 2   | 33.91 | 66.14 | 4.06 | 3.68 | 0.43 | 0.37 | 1.95 | 0.80 |
| 11JY2151 | CML384xMBR/MDR C3 BC F58-2-1-3-B-B-B-3-1-B-B-B                  | 400 | LP   | 2   | 38.68 | 38.64 | 4.34 | 2.80 | 0.70 | 0.30 | 1.00 | 1.00 |
| 11JY2152 | CML389                                                          | 401 | LP   | 2   | 46.34 | 52.31 | 4.62 | 2.57 | 0.48 | 0.30 | 1.13 | 0.78 |
| 11JY2153 | CML389/CML144//CML159//POOL15QPM5R-B-6-B-B                      | 402 | LP   | 2   | 50.84 | 49.64 | 4.54 | 2.82 | 0.66 | 0.19 | 0.98 | 0.85 |
| 11JY2154 | CML40                                                           | 403 | LP   | 2   | 40.34 | 59.64 | 3.52 | 3.60 | 0.87 | 0.34 | 1.48 | 1.21 |
| 11JY2155 | CML402                                                          | 404 | LP   | 2   | 41.01 | 60.31 | 4.81 | 3.56 | 0.68 | 0.39 | 1.47 | 1.07 |

| Seed ID  | Acc                                         | Gen | trt. | rep | SL    | RL    | SFW  | RFW  | SDW  | RDW  | RSR  | TDM  |
|----------|---------------------------------------------|-----|------|-----|-------|-------|------|------|------|------|------|------|
| 11JY2157 | CML411                                      | 405 | LP   | 2   | 39.34 | 47.64 | 3.29 | 2.15 | 0.31 | 0.20 | 1.21 | 0.51 |
| 11JY2160 | CML423                                      | 406 | LP   | 2   | 49.84 | 56.14 | 7.00 | 3.42 | 0.58 | 0.25 | 1.13 | 0.83 |
| 11JY2162 | CML428                                      | 407 | LP   | 2   | 37.68 | 56.98 | 2.83 | 2.46 | 0.27 | 0.20 | 1.51 | 0.48 |
| 11JY2163 | CML430                                      | 408 | LP   | 2   | 38.34 | 49.64 | 4.21 | 1.98 | 0.33 | 0.18 | 1.29 | 0.51 |
| 11JY2164 | CML431                                      | 409 | LP   | 2   | 36.84 | 45.64 | 3.49 | 2.30 | 0.27 | 0.15 | 1.24 | 0.42 |
| 11JY2165 | CML432                                      | 410 | LP   | 2   | 39.68 | 38.98 | 4.89 | 2.09 | 0.46 | 0.20 | 0.98 | 0.66 |
| 11JY2166 | CML433                                      | 411 | LP   | 2   | 31.84 | 40.64 | 3.06 | 1.76 | 0.29 | 0.18 | 1.28 | 0.47 |
| 11JY2168 | CML445/CML144//CML159//POOL15QPMSR-B-55-B-B | 412 | LP   | 2   | 43.01 | 48.31 | 5.11 | 2.83 | 0.46 | 0.27 | 1.12 | 0.74 |
| 11JY2170 | CML454                                      | 413 | LP   | 2   | 39.34 | 69.98 | 3.44 | 3.00 | 0.35 | 0.29 | 1.78 | 0.65 |
| 11JY2172 | CML468                                      | 414 | LP   | 2   | 47.34 | 56.31 | 3.28 | 2.69 | 0.34 | 0.22 | 1.19 | 0.56 |
| 11JY2173 | CML470                                      | 415 | LP   | 2   | 47.68 | 45.64 | 4.81 | 3.33 | 0.49 | 0.30 | 0.96 | 0.78 |
| 11JY2176 | CML479                                      | 416 | LP   | 2   | 31.34 | 55.31 | 2.89 | 2.16 | 0.30 | 0.20 | 1.76 | 0.50 |
| 11JY2177 | CML480                                      | 417 | LP   | 2   | 45.68 | 49.64 | 3.99 | 2.48 | 0.42 | 0.25 | 1.09 | 0.67 |
| 11JY2180 | CML496                                      | 418 | LP   | 2   | 31.58 | 48.14 | 2.53 | 1.46 | 0.24 | 0.13 | 1.52 | 0.37 |
| 11JY2189 | CML80                                       | 419 | LP   | 2   | 48.34 | 49.31 | 5.26 | 2.88 | 0.45 | 0.25 | 1.02 | 0.70 |
| 11JY2192 | CML94                                       | 420 | LP   | 2   | 48.34 | 65.64 | 4.89 | 3.18 | 0.52 | 0.34 | 1.36 | 0.86 |
| 11JY2193 | CML96                                       | 421 | LP   | 2   | 42.01 | 37.64 | 3.76 | 1.63 | 0.35 | 0.16 | 0.90 | 0.51 |
| 11JY2194 | CML99                                       | 422 | LP   | 2   | 40.34 | 41.14 | 4.21 | 2.38 | 0.39 | 0.23 | 1.02 | 0.62 |
| 11JY2196 | Cuba/GuadC3F125-2-2-1-B-B-B                 | 423 | LP   | 2   | 41.41 | 38.39 | 4.43 | 2.46 | 0.44 | 0.23 | 0.93 | 0.67 |
| 11JY2197 | CY9169                                      | 424 | LP   | 2   | 42.72 | 46.14 | 4.78 | 2.42 | 0.46 | 0.23 | 1.08 | 0.69 |
| 11JY2198 | DTPW C9                                     | 425 | LP   | 2   | 36.05 | 50.47 | 3.16 | 2.21 | 0.37 | 0.23 | 1.40 | 0.60 |
| 11JY2199 | DTPWC9-F104-5-4-1-1-B-B-B                   | 426 | LP   | 2   | 50.05 | 65.47 | 5.89 | 3.00 | 0.60 | 0.32 | 1.31 | 0.93 |
| 11JY2200 | DTPY C9                                     | 427 | LP   | 2   | 34.58 | 50.14 | 3.74 | 3.23 | 0.39 | 0.27 | 1.45 | 0.66 |
| 11JY2201 | DTPYC9-F46-1-2-1-2-B-B                      | 428 | LP   | 2   | 41.72 | 53.14 | 3.32 | 2.64 | 0.40 | 0.22 | 1.27 | 0.62 |
| 11JY2202 | DTPYC9-F46-3-9-1-1-B-BTL-07B 6614-42        | 429 | LP   | 2   | 30.72 | 42.81 | 2.73 | 1.41 | 0.28 | 0.13 | 1.39 | 0.41 |
| 11JY2204 | Guad 6                                      | 430 | LP   | 2   | 41.72 | 45.81 | 4.00 | 3.19 | 0.45 | 0.32 | 1.10 | 0.77 |
| 11JY2205 | H-16                                        | 431 | LP   | 2   | 50.72 | 58.14 | 5.00 | 2.82 | 0.42 | 0.27 | 1.15 | 0.69 |
| 11JY2207 | La Posta Seq C7-F125-2-1-1-2-B-B-B          | 432 | LP   | 2   | 32.38 | 48.81 | 3.60 | 2.72 | 0.38 | 0.21 | 1.51 | 0.59 |
| 11JY2211 | La Posta Seq C7-F64-2-6-1-2-B-B-B           | 433 | LP   | 2   | 45.91 | 65.81 | 4.64 | 3.61 | 0.51 | 0.34 | 1.43 | 0.84 |
| 11JY2216 | La Posta Seq C7-F96-1-2-1-2-B-B             | 434 | LP   | 2   | 37.58 | 45.14 | 4.49 | 3.04 | 0.43 | 0.26 | 1.20 | 0.69 |
| 11JY2218 | LPSC7                                       | 435 | LP   | 2   | 35.05 | 51.14 | 3.33 | 2.51 | 0.37 | 0.20 | 1.46 | 0.58 |
| 11JY2220 | MAS[206/312]-23-2-1-1-B*6-B-B-B             | 436 | LP   | 2   | 42.72 | 47.81 | 4.39 | 2.52 | 0.48 | 0.22 | 1.12 | 0.70 |
| 11JY2223 | MBR C6 BC F234-1-B-#-1-1-B-B-B-B-B          | 437 | LP   | 2   | 39.05 | 48.81 | 3.66 | 2.75 | 0.41 | 0.26 | 1.25 | 0.67 |
| 11JY2225 | P402c2F2-695-2-BB-2-B*4-1-B                 | 438 | LP   | 2   | 34.72 | 45.31 | 2.88 | 2.46 | 0.29 | 0.15 | 1.31 | 0.45 |
| 11JY2228 | P591c4 F55-2-2-2-B-B-B                      | 439 | LP   | 2   | 40.72 | 34.81 | 3.31 | 1.98 | 0.34 | 0.14 | 0.85 | 0.48 |

| Seed ID  | Acc                                                                      | Gen | trt. | rep | SL    | RL    | SFW  | RFW  | SDW  | RDW  | RSR  | TDM  |
|----------|--------------------------------------------------------------------------|-----|------|-----|-------|-------|------|------|------|------|------|------|
| 11JY2229 | P591c41y2GENF3-1-1-2-B-B-B                                               | 440 | LP   | 2   | 29.72 | 38.81 | 2.73 | 1.56 | 0.30 | 0.12 | 1.31 | 0.42 |
| 11JY2230 | PAZM 6053                                                                | 441 | LP   | 2   | 30.38 | 35.81 | 2.10 | 1.83 | 0.32 | 0.12 | 1.18 | 0.44 |
| 11JY2231 | Pool 21 x Pool 22                                                        | 442 | LP   | 2   | 40.72 | 41.14 | 3.01 | 2.68 | 0.38 | 0.18 | 1.01 | 0.57 |
| 11JY2233 | R15                                                                      | 443 | LP   | 2   | 36.08 | 62.81 | 3.31 | 2.42 | 0.27 | 0.16 | 1.74 | 0.44 |
| 11JY2234 | RDOM 330                                                                 | 444 | LP   | 2   | 36.05 | 41.47 | 2.73 | 2.31 | 0.32 | 0.14 | 1.15 | 0.45 |
| 11JY2238 | VL0512452                                                                | 445 | LP   | 2   | 41.05 | 52.81 | 3.58 | 2.78 | 0.46 | 0.25 | 1.29 | 0.71 |
| 11JY2239 | VL0512464                                                                | 446 | LP   | 2   | 39.22 | 48.31 | 3.29 | 1.95 | 0.35 | 0.18 | 1.23 | 0.53 |
| 11JY2240 | VL05128                                                                  | 447 | LP   | 2   | 46.50 | 60.34 | 4.14 | 2.41 | 0.46 | 0.17 | 1.30 | 0.64 |
| 11JY2241 | VL052                                                                    | 448 | LP   | 2   | 36.24 | 35.48 | 3.10 | 2.06 | 0.30 | 0.17 | 0.98 | 0.47 |
| 11JY2243 | VL05353                                                                  | 449 | LP   | 2   | 52.24 | 53.81 | 5.75 | 4.26 | 0.51 | 0.29 | 1.03 | 0.80 |
| 11JY2244 | VL054178                                                                 | 450 | LP   | 2   | 40.83 | 64.01 | 2.90 | 2.58 | 0.41 | 0.20 | 1.57 | 0.61 |
| 11JY2246 | VL054881                                                                 | 451 | LP   | 2   | 43.16 | 47.34 | 3.33 | 2.84 | 0.45 | 0.23 | 1.10 | 0.69 |
| 11JY2248 | VL0556                                                                   | 452 | LP   | 2   | 36.16 | 64.34 | 2.28 | 2.27 | 0.34 | 0.20 | 1.78 | 0.54 |
| 11JY2249 | VL05561                                                                  | 453 | LP   | 2   | 41.16 | 61.01 | 3.25 | 2.35 | 0.41 | 0.19 | 1.48 | 0.60 |
| 11JY2250 | VL0558                                                                   | 454 | LP   | 2   | 37.58 | 70.48 | 4.65 | 3.25 | 0.50 | 0.35 | 1.88 | 0.85 |
| 11JY2252 | VL05616                                                                  | 455 | LP   | 2   | 39.41 | 53.14 | 4.24 | 2.63 | 0.39 | 0.26 | 1.35 | 0.65 |
| 11JY2255 | VL056942                                                                 | 456 | LP   | 2   | 37.08 | 66.81 | 3.54 | 2.02 | 0.33 | 0.23 | 1.80 | 0.55 |
| 11JY2259 | VL062784                                                                 | 457 | LP   | 2   | 37.74 | 42.81 | 3.40 | 1.91 | 0.30 | 0.18 | 1.13 | 0.48 |
| 11JY2260 | VL062785                                                                 | 458 | LP   | 2   | 38.08 | 54.48 | 3.75 | 2.33 | 0.35 | 0.24 | 1.43 | 0.59 |
| 11JY2262 | VL06384                                                                  | 459 | LP   | 2   | 35.58 | 58.81 | 3.27 | 2.14 | 0.36 | 0.17 | 1.65 | 0.53 |
| 11JY2263 | ZM521B-66-4-1-1-BB-B-B-B                                                 | 460 | LP   | 2   | 42.41 | 45.39 | 3.76 | 2.21 | 0.36 | 0.20 | 1.07 | 0.56 |
| 11JY2264 | 川29♀                                                                     | 461 | LP   | 2   | 43.41 | 48.39 | 3.74 | 1.84 | 0.39 | 0.20 | 1.11 | 0.59 |
| 11JY2265 | 慈溪白糯                                                                     | 462 | LP   | 2   | 37.74 | 53.06 | 2.87 | 2.02 | 0.28 | 0.16 | 1.41 | 0.44 |
| 11JY2266 | 独紫                                                                       | 463 | LP   | 2   | 46.41 | 50.39 | 4.68 | 2.66 | 0.39 | 0.23 | 1.09 | 0.62 |
| 11JY2268 | 交51                                                                      | 464 | LP   | 2   | 40.08 | 43.73 | 3.58 | 2.11 | 0.34 | 0.17 | 1.09 | 0.51 |
| 11JY2269 | 双M9                                                                      | 465 | LP   | 2   | 33.08 | 46.81 | 3.39 | 2.00 | 0.32 | 0.20 | 1.42 | 0.52 |
| 11JY2270 | 四川地方种质                                                                   | 466 | LP   | 2   | 53.41 | 58.39 | 5.22 | 3.22 | 0.48 | 0.27 | 1.09 | 0.74 |
| 11JY2271 | 豫综BC15-2                                                                 | 467 | LP   | 2   | 43.91 | 51.56 | 4.33 | 2.45 | 0.41 | 0.24 | 1.17 | 0.66 |
| 11JY2279 | 407                                                                      | 468 | LP   | 2   | 33.74 | 33.06 | 2.65 | 1.41 | 0.24 | 0.14 | 0.98 | 0.38 |
| 11JY2280 | 412                                                                      | 469 | LP   | 2   | 47.08 | 42.31 | 5.28 | 2.90 | 0.47 | 0.27 | 0.90 | 0.75 |
| 11JY2288 | 485                                                                      | 470 | LP   | 2   | 43.91 | 55.81 | 5.08 | 3.53 | 0.47 | 0.25 | 1.27 | 0.72 |
| 11JY2290 | 495                                                                      | 471 | LP   | 2   | 42.58 | 48.81 | 3.11 | 2.11 | 0.35 | 0.18 | 1.15 | 0.53 |
| 11JY2311 | 8001                                                                     | 472 | LP   | 2   | 37.08 | 44.14 | 3.72 | 2.00 | 0.36 | 0.20 | 1.19 | 0.56 |
| 11JY2317 | [(CML395/CML444)-B-4-1-3-1-B/CML395//DTPWC8F31-1-1-2-2]-5-1-2-2-BB-B-B-B | 473 | LP   | 2   | 29.58 | 59.81 | 2.61 | 1.95 | 0.24 | 0.17 | 2.02 | 0.42 |

| Seed ID  | Acc              | Gen | trt. | rep | SL    | RL    | SFW  | RFW  | SDW  | RDW  | RSR  | TDM  |
|----------|------------------|-----|------|-----|-------|-------|------|------|------|------|------|------|
| 11JY2327 | 4F1              | 474 | LP   | 2   | 40.58 | 43.14 | 4.76 | 3.73 | 0.48 | 0.35 | 1.06 | 0.83 |
| 11JY2356 | B73              | 475 | LP   | 2   | 39.91 | 33.06 | 3.46 | 1.60 | 0.39 | 0.16 | 0.83 | 0.55 |
| 11JY2391 | E28              | 476 | LP   | 2   | 39.91 | 51.14 | 5.11 | 3.14 | 0.55 | 0.30 | 1.28 | 0.85 |
| 11JY2394 | ES40             | 477 | LP   | 2   | 34.58 | 33.31 | 3.45 | 1.79 | 0.30 | 0.14 | 0.96 | 0.44 |
| 11JY2396 | F42              | 478 | LP   | 2   | 42.24 | 36.81 | 5.56 | 3.74 | 0.54 | 0.36 | 0.87 | 0.90 |
| 11JY2398 | FR19             | 479 | LP   | 2   | 35.58 | 52.81 | 3.64 | 2.83 | 0.37 | 0.24 | 1.48 | 0.61 |
| 11JY2426 | MBNA             | 480 | LP   | 2   | 35.50 | 42.01 | 2.66 | 2.28 | 0.33 | 0.16 | 1.18 | 0.49 |
| 11JY2434 | NS701            | 481 | LP   | 2   | 43.50 | 57.34 | 3.18 | 2.22 | 0.36 | 0.17 | 1.32 | 0.54 |
| 11JY2445 | PHG83            | 482 | LP   | 2   | 45.83 | 58.68 | 4.89 | 3.39 | 0.48 | 0.19 | 1.28 | 0.67 |
| 11JY2446 | PHN47            | 483 | LP   | 2   | 38.50 | 37.68 | 3.08 | 2.81 | 0.39 | 0.17 | 0.98 | 0.56 |
| 11JY2453 | R09              | 484 | LP   | 2   | 40.58 | 61.81 | 3.49 | 2.68 | 0.38 | 0.22 | 1.52 | 0.60 |
| 11JY2467 | Va35             | 485 | LP   | 2   | 36.41 | 56.14 | 3.95 | 2.75 | 0.31 | 0.23 | 1.54 | 0.54 |
| 11JY2470 | W8304            | 486 | LP   | 2   | 50.74 | 39.48 | 4.53 | 1.94 | 0.41 | 0.24 | 0.78 | 0.65 |
| 11JY2474 | XZY364-1         | 487 | LP   | 2   | 33.33 | 42.73 | 1.11 | 1.27 | 0.23 | 0.14 | 1.28 | 0.37 |
| 11JY2491 | 长3154            | 488 | LP   | 2   | 36.49 | 57.89 | 3.23 | 2.83 | 0.46 | 0.33 | 1.59 | 0.79 |
| 11JY2498 | 丹3130            | 489 | LP   | 2   | 30.91 | 35.14 | 3.02 | 1.66 | 0.30 | 0.20 | 1.14 | 0.50 |
| 11JY2500 | 丹340             | 490 | LP   | 2   | 38.99 | 54.73 | 3.03 | 2.51 | 0.37 | 0.22 | 1.40 | 0.59 |
| 11JY2504 | 丹360             | 491 | LP   | 2   | 42.74 | 52.48 | 4.23 | 2.57 | 0.42 | 0.23 | 1.23 | 0.64 |
| 11JY2522 | 辐746             | 492 | LP   | 2   | 51.41 | 64.81 | 5.10 | 3.28 | 0.48 | 0.34 | 1.26 | 0.83 |
| 11JY2526 | 旱21              | 493 | LP   | 2   | 44.41 | 52.14 | 4.07 | 2.51 | 0.36 | 0.24 | 1.17 | 0.59 |
| 11JY2547 | 吉419             | 494 | LP   | 2   | 42.08 | 57.48 | 3.98 | 2.64 | 0.40 | 0.26 | 1.37 | 0.66 |
| 11JY2557 | 吉846             | 495 | LP   | 2   | 50.83 | 54.68 | 5.75 | 3.72 | 0.58 | 0.23 | 1.08 | 0.82 |
| 11JY2563 | 冀研01-3-2-2-1-5-1 | 496 | LP   | 2   | 37.83 | 43.68 | 4.54 | 2.12 | 0.52 | 0.17 | 1.15 | 0.70 |
| 11JY2570 | 金黄96C            | 497 | LP   | 2   | 42.33 | 50.06 | 1.71 | 1.47 | 0.29 | 0.15 | 1.18 | 0.44 |
| 11JY2574 | 辽138             | 498 | LP   | 2   | 41.16 | 58.68 | 4.79 | 3.42 | 0.52 | 0.24 | 1.43 | 0.77 |
| 11JY2587 | 辽孤001            | 499 | LP   | 2   | 42.41 | 49.39 | 4.98 | 3.07 | 0.53 | 0.29 | 1.16 | 0.82 |
| 11JY2603 | 齐205             | 500 | LP   | 2   | 47.41 | 39.06 | 4.47 | 2.20 | 0.46 | 0.25 | 0.82 | 0.71 |
| 11JY2606 | 齐310             | 501 | LP   | 2   | 32.41 | 32.73 | 3.04 | 1.58 | 0.30 | 0.13 | 1.01 | 0.43 |
| 11JY2621 | 双105             | 502 | LP   | 2   | 42.08 | 39.06 | 4.29 | 2.00 | 0.40 | 0.23 | 0.93 | 0.63 |
| 11JY2623 | 双741             | 503 | LP   | 2   | 41.74 | 41.39 | 4.43 | 2.29 | 0.39 | 0.18 | 0.99 | 0.56 |
| 11JY2667 | 郑22              | 504 | LP   | 2   | 41.83 | 56.68 | 4.28 | 2.90 | 0.48 | 0.27 | 1.35 | 0.75 |
| 11JY2672 | 郑29              | 505 | LP   | 2   | 45.49 | 42.39 | 4.50 | 2.98 | 0.46 | 0.29 | 0.93 | 0.75 |
| 11JY2675 | 郑30              | 506 | LP   | 2   | 41.83 | 47.68 | 3.81 | 2.20 | 0.43 | 0.16 | 1.14 | 0.59 |
| 11JY2677 | 郑35              | 507 | LP   | 2   | 40.16 | 54.01 | 4.25 | 2.75 | 0.51 | 0.30 | 1.34 | 0.81 |

| Seed ID  | Acc                                                                             | Gen | trt. | rep | SL    | RL    | SFW  | RFW  | SDW  | RDW  | RSR  | TDM  |
|----------|---------------------------------------------------------------------------------|-----|------|-----|-------|-------|------|------|------|------|------|------|
| 11JY2697 | 綜31                                                                             | 508 | LP   | 2   | 48.16 | 49.01 | 4.52 | 2.32 | 0.50 | 0.22 | 1.02 | 0.72 |
| 12JY0001 | C5 RIL P2                                                                       | 509 | LP   | 2   | 50.00 | 63.39 | 2.35 | 2.67 | 0.42 | 0.22 | 1.27 | 0.64 |
| 12JY0002 | C5 RIL P1                                                                       | 510 | LP   | 2   | 32.99 | 41.06 | 1.63 | 2.50 | 0.32 | 0.23 | 1.24 | 0.55 |
| 12JY0015 | [(SML*SMQPM)*(MTL*SMQPM)]F1S6-1-25-BB-1-B                                       | 511 | LP   | 2   | 47.99 | 41.06 | 4.17 | 2.48 | 0.42 | 0.21 | 0.86 | 0.62 |
| 12JY0017 | [CML159/[CML159/[MSRXPOOL9]C1F2-205-1(OSU23i)-5-3-X-X-1-BB]F2-3sx]-8-1-1-BB-1-B | 512 | LP   | 2   | 36.99 | 58.73 | 2.85 | 2.24 | 0.45 | 0.23 | 1.59 | 0.69 |
| 12JY0018 | [CML198/LPSC3H144-1-2-2-2-2-#-BB]-1-4-1-1-4-B*4-B-B-B                           | 513 | LP   | 2   | 35.33 | 63.06 | 3.03 | 2.60 | 0.38 | 0.27 | 1.79 | 0.65 |
| 12JY0029 | [DTPWC8F31-4-2-1-6/CML444//ZM521B-66-4-1-1-1-BB]-3-2-1-B-B-B                    | 514 | LP   | 2   | 33.99 | 59.39 | 3.30 | 2.52 | 0.37 | 0.21 | 1.75 | 0.57 |
| 12JY0040 | 18-599                                                                          | 515 | LP   | 2   | 52.66 | 30.73 | 3.87 | 1.57 | 0.48 | 0.21 | 0.58 | 0.68 |
| 12JY0041 | 18-599(RED)                                                                     | 516 | LP   | 2   | 41.33 | 37.39 | 2.75 | 1.17 | 0.41 | 0.18 | 0.90 | 0.59 |
| 12JY0108 | CML330                                                                          | 517 | LP   | 2   | 30.66 | 68.73 | 1.94 | 2.86 | 0.32 | 0.25 | 2.24 | 0.58 |
| 12JY0122 | CML418                                                                          | 518 | LP   | 2   | 31.33 | 35.73 | 0.74 | 1.25 | 0.23 | 0.12 | 1.14 | 0.35 |
| 12JY0146 | CML504                                                                          | 519 | LP   | 2   | 34.99 | 52.73 | 1.54 | 1.26 | 0.27 | 0.17 | 1.51 | 0.44 |
| 12JY0156 | Cuba/Guad C3 F53-3-1-1-B-B-B                                                    | 520 | LP   | 2   | 43.33 | 53.06 | 2.93 | 2.11 | 0.34 | 0.24 | 1.22 | 0.58 |
| 12JY0164 | ECA-MOROSR( BC1)F2-7-ECAVEE7/PL15QPMC7SRC1F2//POOL15QPMSR-B-4-B-B               | 521 | LP   | 2   | 37.99 | 53.73 | 2.24 | 1.44 | 0.28 | 0.15 | 1.41 | 0.43 |
| 12JY0167 | INTA-191-2-1-2-B*8-B-B-B                                                        | 522 | LP   | 2   | 37.33 | 43.06 | 1.60 | 1.39 | 0.26 | 0.14 | 1.15 | 0.40 |
| 12JY0173 | La Posta Seq C7-F86-1-1-1-1-B-B-B                                               | 523 | LP   | 2   | 22.99 | 32.39 | 0.27 | 0.94 | 0.13 | 0.12 | 1.41 | 0.25 |
| 12JY0185 | P501SRc0-F2-47-3-1-1-B-B-B-B                                                    | 524 | LP   | 2   | 26.49 | 40.89 | 0.30 | 1.09 | 0.13 | 0.08 | 1.54 | 0.21 |
| 12JY0208 | VL05610                                                                         | 525 | LP   | 2   | 36.87 | 31.68 | 2.53 | 1.62 | 0.34 | 0.20 | 0.86 | 0.54 |
| 12JY0226 | 178                                                                             | 526 | LP   | 2   | 30.33 | 19.39 | 1.09 | 1.44 | 0.27 | 0.17 | 0.64 | 0.45 |
| 12JY0228 | 273                                                                             | 527 | LP   | 2   | 44.37 | 44.18 | 4.03 | 2.58 | 0.45 | 0.21 | 1.00 | 0.66 |
| 12JY0229 | 288                                                                             | 528 | LP   | 2   | 32.99 | 31.39 | 1.25 | 1.42 | 0.24 | 0.14 | 0.95 | 0.38 |
| 12JY0240 | 764                                                                             | 529 | LP   | 2   | 38.95 | 53.43 | 2.99 | 2.12 | 0.35 | 0.19 | 1.37 | 0.54 |
| 12JY0246 | 6103                                                                            | 530 | LP   | 2   | 34.33 | 48.39 | 1.67 | 1.75 | 0.25 | 0.20 | 1.41 | 0.45 |
| 12JY0252 | 81565                                                                           | 531 | LP   | 2   | 37.37 | 38.43 | 2.69 | 1.99 | 0.31 | 0.19 | 1.03 | 0.50 |
| 12JY0264 | 634-11511                                                                       | 532 | LP   | 2   | 41.54 | 48.77 | 3.60 | 1.81 | 0.41 | 0.18 | 1.17 | 0.59 |
| 12JY0265 | 698-1                                                                           | 533 | LP   | 2   | 38.66 | 40.73 | 3.67 | 2.40 | 0.33 | 0.21 | 1.05 | 0.54 |
| 12JY0308 | FAPW                                                                            | 534 | LP   | 2   | 46.08 | 38.81 | 4.50 | 2.44 | 0.42 | 0.23 | 0.84 | 0.65 |
| 12JY0322 | LH132                                                                           | 535 | LP   | 2   | 43.41 | 60.81 | 4.02 | 2.57 | 0.30 | 0.19 | 1.40 | 0.49 |
| 12JY0323 | LH51                                                                            | 536 | LP   | 2   | 33.41 | 37.14 | 2.98 | 2.38 | 0.22 | 0.16 | 1.11 | 0.38 |
| 12JY0325 | LX9801                                                                          | 537 | LP   | 2   | 42.41 | 60.14 | 3.07 | 2.60 | 0.22 | 0.16 | 1.42 | 0.38 |



| Seed ID  | Acc       | Gen | trt. | rep | SL    | RL    | SFW   | RFW  | SDW  | RDW  | RSR  | TDM  |
|----------|-----------|-----|------|-----|-------|-------|-------|------|------|------|------|------|
| 12JY0329 | Mo17      | 538 | LP   | 2   | 39.08 | 28.14 | 3.02  | 2.15 | 0.28 | 0.14 | 0.72 | 0.42 |
| 12JY0347 | R08       | 539 | LP   | 2   | 38.74 | 57.81 | 2.08  | 1.90 | 0.22 | 0.10 | 1.49 | 0.32 |
| 12JY0349 | RP125     | 540 | LP   | 2   | 37.66 | 51.98 | 3.70  | 2.31 | 0.36 | 0.20 | 1.38 | 0.56 |
| 12JY0365 | Zhao835   | 541 | LP   | 2   | 39.41 | 39.14 | 4.38  | 3.30 | 0.38 | 0.23 | 0.99 | 0.60 |
| 12JY0370 | 昌7-2      | 542 | LP   | 2   | 38.29 | 53.18 | 2.52  | 1.75 | 0.32 | 0.17 | 1.39 | 0.50 |
| 12JY0383 | 丹598      | 543 | LP   | 2   | 45.20 | 39.93 | 3.89  | 2.32 | 0.44 | 0.20 | 0.88 | 0.64 |
| 12JY0401 | 黄早四       | 544 | LP   | 2   | 33.33 | 40.23 | 2.79  | 1.88 | 0.35 | 0.17 | 1.21 | 0.52 |
| 12JY0416 | 吉853      | 545 | LP   | 2   | 39.08 | 50.14 | 3.35  | 1.98 | 0.22 | 0.12 | 1.28 | 0.35 |
| 12JY0443 | 南21-3     | 546 | LP   | 2   | 48.70 | 50.77 | 4.37  | 2.82 | 0.43 | 0.25 | 1.04 | 0.68 |
| 12JY0450 | 齐319      | 547 | LP   | 2   | 45.54 | 44.77 | 3.90  | 3.25 | 0.40 | 0.27 | 0.98 | 0.68 |
| 12JY0457 | 沈5003     | 548 | LP   | 2   | 30.49 | 44.89 | 1.10  | 1.74 | 0.22 | 0.20 | 1.47 | 0.41 |
| 12JY0462 | 四287      | 549 | LP   | 2   | 41.12 | 59.18 | 4.59  | 4.61 | 0.43 | 0.33 | 1.44 | 0.76 |
| 12JY0473 | 铁7922     | 550 | LP   | 2   | 40.41 | 45.14 | 5.71  | 2.37 | 0.39 | 0.21 | 1.12 | 0.61 |
| 11JY1255 | C5 RIL 2  | 1   | NP   | 1   | 67.88 | 37.47 | 8.30  | 3.49 | 0.55 | 0.21 | 0.55 | 0.76 |
| 11JY1256 | C5 RIL 3  | 2   | NP   | 1   | 75.88 | 47.80 | 9.39  | 3.15 | 0.79 | 0.19 | 0.63 | 0.99 |
| 11JY1258 | C5 RIL 5  | 3   | NP   | 1   | 70.22 | 34.80 | 8.45  | 2.44 | 0.54 | 0.16 | 0.50 | 0.70 |
| 11JY1259 | C5 RIL 6  | 4   | NP   | 1   | 79.55 | 37.13 | 11.46 | 3.52 | 0.77 | 0.21 | 0.47 | 0.98 |
| 11JY1262 | C5 RIL 10 | 5   | NP   | 1   | 67.55 | 36.13 | 6.51  | 3.18 | 0.41 | 0.17 | 0.53 | 0.58 |
| 11JY1263 | C5 RIL 11 | 6   | NP   | 1   | 70.55 | 29.47 | 10.59 | 3.73 | 0.76 | 0.20 | 0.42 | 0.96 |
| 11JY1264 | C5 RIL 12 | 7   | NP   | 1   | 59.88 | 39.13 | 4.29  | 1.96 | 0.27 | 0.11 | 0.65 | 0.38 |
| 11JY1267 | C5 RIL 17 | 8   | NP   | 1   | 69.22 | 35.80 | 7.44  | 3.15 | 0.50 | 0.15 | 0.52 | 0.65 |
| 11JY1268 | C5 RIL 18 | 9   | NP   | 1   | 61.05 | 30.13 | 6.76  | 2.02 | 0.37 | 0.10 | 0.49 | 0.46 |
| 11JY1269 | C5 RIL 19 | 10  | NP   | 1   | 68.55 | 42.63 | 9.81  | 3.89 | 0.68 | 0.23 | 0.62 | 0.91 |
| 11JY1271 | C5 RIL 21 | 11  | NP   | 1   | 74.55 | 41.13 | 12.19 | 4.94 | 0.87 | 0.27 | 0.55 | 1.14 |
| 11JY1272 | C5 RIL 24 | 12  | NP   | 1   | 63.88 | 30.47 | 7.16  | 3.60 | 0.49 | 0.20 | 0.48 | 0.68 |
| 11JY1274 | C5 RIL 26 | 13  | NP   | 1   | 78.22 | 41.13 | 15.36 | 4.94 | 1.15 | 0.33 | 0.53 | 1.48 |
| 11JY1275 | C5 RIL 27 | 14  | NP   | 1   | 62.05 | 38.63 | 7.69  | 3.56 | 0.55 | 0.17 | 0.62 | 0.72 |
| 11JY1276 | C5 RIL 28 | 15  | NP   | 1   | 68.22 | 24.80 | 6.65  | 1.91 | 0.42 | 0.10 | 0.36 | 0.52 |
| 11JY1278 | C5 RIL 30 | 16  | NP   | 1   | 67.88 | 37.47 | 8.75  | 3.33 | 0.60 | 0.21 | 0.55 | 0.81 |
| 11JY1279 | C5 RIL 31 | 17  | NP   | 1   | 58.22 | 29.47 | 6.54  | 2.09 | 0.39 | 0.13 | 0.51 | 0.52 |
| 11JY1280 | C5 RIL 32 | 18  | NP   | 1   | 78.55 | 38.13 | 15.29 | 5.15 | 1.20 | 0.34 | 0.49 | 1.54 |
| 11JY1281 | C5 RIL 34 | 19  | NP   | 1   | 67.88 | 26.13 | 10.24 | 3.86 | 0.71 | 0.23 | 0.38 | 0.94 |
| 11JY1282 | C5 RIL 36 | 20  | NP   | 1   | 72.55 | 27.13 | 7.80  | 3.11 | 0.62 | 0.20 | 0.37 | 0.81 |
| 11JY1283 | C5 RIL 38 | 21  | NP   | 1   | 62.05 | 36.63 | 5.68  | 3.24 | 0.37 | 0.15 | 0.59 | 0.52 |
| 11JY1284 | C5 RIL 39 | 22  | NP   | 1   | 71.55 | 28.80 | 8.12  | 3.92 | 0.71 | 0.24 | 0.40 | 0.95 |
| 11JY1285 | C5 RIL 40 | 23  | NP   | 1   | 78.22 | 35.13 | 10.33 | 4.53 | 0.85 | 0.39 | 0.45 | 1.24 |

| Seed ID  | Acc        | Gen | trt. | rep | SL    | RL    | SFW   | RFW  | SDW  | RDW  | RSR  | TDM  |
|----------|------------|-----|------|-----|-------|-------|-------|------|------|------|------|------|
| 11JY1286 | C5 RIL 41  | 24  | NP   | 1   | 73.22 | 28.47 | 8.58  | 3.46 | 0.70 | 0.22 | 0.39 | 0.92 |
| 11JY1287 | C5 RIL 42  | 25  | NP   | 1   | 80.05 | 41.63 | 9.51  | 4.01 | 0.75 | 0.21 | 0.52 | 0.96 |
| 11JY1288 | C5 RIL 44  | 26  | NP   | 1   | 75.05 | 35.63 | 5.75  | 2.41 | 0.40 | 0.12 | 0.47 | 0.51 |
| 11JY1289 | C5 RIL 45  | 27  | NP   | 1   | 79.55 | 43.13 | 7.75  | 2.97 | 0.51 | 0.21 | 0.54 | 0.72 |
| 11JY1290 | C5 RIL 46  | 28  | NP   | 1   | 71.55 | 27.80 | 7.57  | 2.98 | 0.54 | 0.16 | 0.39 | 0.70 |
| 11JY1292 | C5 RIL 48  | 29  | NP   | 1   | 76.55 | 37.63 | 11.65 | 3.39 | 0.86 | 0.23 | 0.49 | 1.09 |
| 11JY1293 | C5 RIL 49  | 30  | NP   | 1   | 79.88 | 46.13 | 11.04 | 4.77 | 1.03 | 0.33 | 0.58 | 1.36 |
| 11JY1299 | C5 RIL 57  | 31  | NP   | 1   | 73.88 | 31.13 | 6.30  | 3.81 | 0.63 | 0.20 | 0.42 | 0.83 |
| 11JY1301 | C5 RIL 59  | 32  | NP   | 1   | 73.88 | 34.80 | 7.94  | 3.38 | 0.55 | 0.16 | 0.47 | 0.71 |
| 11JY1305 | C5 RIL 64  | 33  | NP   | 1   | 78.55 | 47.13 | 7.99  | 3.59 | 0.76 | 0.30 | 0.60 | 1.07 |
| 11JY1310 | C5 RIL 68  | 34  | NP   | 1   | 77.55 | 43.63 | 12.04 | 5.54 | 0.81 | 0.36 | 0.56 | 1.17 |
| 11JY1312 | C5 RIL 70  | 35  | NP   | 1   | 70.22 | 37.13 | 11.81 | 2.93 | 0.84 | 0.21 | 0.53 | 1.05 |
| 11JY1315 | C5 RIL 82  | 36  | NP   | 1   | 66.05 | 37.80 | 9.59  | 2.64 | 0.98 | 0.39 | 0.57 | 1.37 |
| 11JY1316 | C5 RIL 74  | 37  | NP   | 1   | 61.55 | 29.80 | 9.47  | 2.66 | 0.79 | 0.20 | 0.48 | 0.99 |
| 11JY1318 | C5 RIL 78  | 38  | NP   | 1   | 60.88 | 35.13 | 8.32  | 2.41 | 0.54 | 0.17 | 0.58 | 0.71 |
| 11JY1319 | C5 RIL 79  | 39  | NP   | 1   | 71.88 | 39.47 | 12.30 | 4.14 | 1.02 | 0.31 | 0.55 | 1.32 |
| 11JY1320 | C5 RIL 80  | 40  | NP   | 1   | 57.05 | 31.80 | 5.79  | 2.09 | 0.48 | 0.17 | 0.56 | 0.66 |
| 11JY1323 | C5 RIL 84  | 41  | NP   | 1   | 65.05 | 42.30 | 11.10 | 3.59 | 0.85 | 0.24 | 0.65 | 1.09 |
| 11JY1324 | C5 RIL 86  | 42  | NP   | 1   | 56.55 | 36.80 | 7.51  | 2.28 | 0.57 | 0.19 | 0.65 | 0.76 |
| 11JY1326 | C5 RIL 88  | 43  | NP   | 1   | 64.88 | 41.13 | 9.36  | 2.83 | 0.77 | 0.21 | 0.63 | 0.98 |
| 11JY1327 | C5 RIL 89  | 44  | NP   | 1   | 66.05 | 41.30 | 11.07 | 3.09 | 0.78 | 0.27 | 0.63 | 1.06 |
| 11JY1328 | C5 RIL 90  | 45  | NP   | 1   | 61.55 | 35.30 | 9.10  | 2.49 | 0.65 | 0.20 | 0.57 | 0.85 |
| 11JY1329 | C5 RIL 92  | 46  | NP   | 1   | 70.05 | 38.30 | 15.56 | 4.21 | 0.97 | 0.29 | 0.55 | 1.26 |
| 11JY1333 | C5 RIL 96  | 47  | NP   | 1   | 75.22 | 41.47 | 13.27 | 3.31 | 1.02 | 0.24 | 0.55 | 1.26 |
| 11JY1334 | C5 RIL 99  | 48  | NP   | 1   | 68.55 | 38.80 | 10.65 | 3.40 | 0.84 | 0.24 | 0.57 | 1.08 |
| 11JY1336 | C5 RIL 102 | 49  | NP   | 1   | 57.22 | 30.47 | 7.23  | 1.96 | 0.75 | 0.21 | 0.53 | 0.96 |
| 11JY1337 | C5 RIL 103 | 50  | NP   | 1   | 63.88 | 32.80 | 10.10 | 3.21 | 0.87 | 0.24 | 0.51 | 1.11 |
| 11JY1339 | C5 RIL 106 | 51  | NP   | 1   | 69.55 | 27.80 | 12.01 | 4.45 | 1.04 | 0.35 | 0.40 | 1.39 |
| 11JY1341 | C5 RIL 108 | 52  | NP   | 1   | 70.55 | 43.30 | 5.79  | 2.80 | 0.43 | 0.15 | 0.61 | 0.58 |
| 11JY1349 | C5 RIL 119 | 53  | NP   | 1   | 75.55 | 43.30 | 10.14 | 4.10 | 0.87 | 0.23 | 0.57 | 1.10 |
| 11JY1350 | C5 RIL 120 | 54  | NP   | 1   | 74.55 | 33.63 | 7.59  | 3.53 | 0.57 | 0.17 | 0.45 | 0.74 |
| 11JY1351 | C5 RIL 121 | 55  | NP   | 1   | 80.05 | 49.80 | 13.83 | 5.26 | 0.99 | 0.28 | 0.62 | 1.27 |
| 11JY1352 | C5 RIL 122 | 56  | NP   | 1   | 76.22 | 43.30 | 12.29 | 4.21 | 0.86 | 0.18 | 0.57 | 1.04 |
| 11JY1354 | C5 RIL 124 | 57  | NP   | 1   | 84.88 | 45.30 | 13.88 | 4.62 | 1.12 | 0.27 | 0.53 | 1.39 |
| 11JY1356 | C5 RIL 126 | 58  | NP   | 1   | 78.05 | 39.30 | 8.07  | 2.81 | 0.61 | 0.16 | 0.50 | 0.77 |
| 11JY1357 | C5 RIL 128 | 59  | NP   | 1   | 70.88 | 41.30 | 10.03 | 3.18 | 0.76 | 0.20 | 0.58 | 0.95 |

| Seed ID  | Acc        | Gen | trt. | rep | SL    | RL    | SFW   | RFW  | SDW  | RDW  | RSR  | TDM  |
|----------|------------|-----|------|-----|-------|-------|-------|------|------|------|------|------|
| 11JY1360 | C5 RIL 131 | 60  | NP   | 1   | 71.88 | 39.97 | 9.27  | 4.70 | 0.69 | 0.27 | 0.56 | 0.96 |
| 11JY1362 | C5 RIL 133 | 61  | NP   | 1   | 68.55 | 39.30 | 8.28  | 2.80 | 0.52 | 0.15 | 0.57 | 0.66 |
| 11JY1363 | C5 RIL 134 | 62  | NP   | 1   | 74.22 | 50.97 | 14.45 | 4.17 | 0.71 | 0.26 | 0.69 | 0.97 |
| 11JY1364 | C5 RIL 135 | 63  | NP   | 1   | 80.22 | 51.97 | 11.61 | 3.70 | 1.05 | 0.27 | 0.65 | 1.32 |
| 11JY1365 | C5 RIL 137 | 64  | NP   | 1   | 67.55 | 47.80 | 6.76  | 2.75 | 0.39 | 0.08 | 0.71 | 0.47 |
| 11JY1366 | C5 RIL 138 | 65  | NP   | 1   | 72.55 | 38.97 | 8.68  | 3.22 | 0.65 | 0.14 | 0.54 | 0.79 |
| 11JY1367 | C5 RIL 139 | 66  | NP   | 1   | 66.55 | 34.30 | 4.89  | 1.74 | 0.30 | 0.07 | 0.52 | 0.37 |
| 11JY1368 | C5 RIL 140 | 67  | NP   | 1   | 74.88 | 39.63 | 10.91 | 3.93 | 0.90 | 0.29 | 0.53 | 1.19 |
| 11JY1369 | C5 RIL 141 | 68  | NP   | 1   | 71.22 | 34.97 | 7.90  | 2.10 | 0.50 | 0.11 | 0.49 | 0.61 |
| 11JY1370 | C5 RIL 142 | 69  | NP   | 1   | 63.05 | 31.80 | 8.87  | 2.43 | 0.57 | 0.12 | 0.50 | 0.69 |
| 11JY1372 | C5 RIL 144 | 70  | NP   | 1   | 78.55 | 52.30 | 11.67 | 4.05 | 1.05 | 0.31 | 0.67 | 1.36 |
| 11JY1374 | C5 RIL 146 | 71  | NP   | 1   | 78.22 | 46.80 | 15.66 | 4.30 | 0.97 | 0.26 | 0.60 | 1.23 |
| 11JY1376 | C5 RIL 150 | 72  | NP   | 1   | 80.55 | 43.13 | 11.62 | 3.05 | 0.79 | 0.17 | 0.54 | 0.96 |
| 11JY1377 | C5 RIL 151 | 73  | NP   | 1   | 62.80 | 45.30 | 15.19 | 4.66 | 1.25 | 0.36 | 0.72 | 1.61 |
| 11JY1378 | C5 RIL 152 | 74  | NP   | 1   | 43.60 | 28.40 | 5.43  | 1.58 | 0.48 | 0.16 | 0.65 | 0.64 |
| 11JY1379 | C5 RIL 153 | 75  | NP   | 1   | 51.00 | 24.70 | 6.81  | 2.29 | 0.61 | 0.18 | 0.48 | 0.79 |
| 11JY1382 | C5 RIL 156 | 76  | NP   | 1   | 56.20 | 28.70 | 10.26 | 1.77 | 0.79 | 0.20 | 0.51 | 0.99 |
| 11JY1383 | C5 RIL 157 | 77  | NP   | 1   | 36.35 | 25.70 | 4.63  | 1.31 | 0.36 | 0.14 | 0.71 | 0.50 |
| 11JY1384 | C5 RIL 158 | 78  | NP   | 1   | 49.75 | 51.30 | 8.20  | 2.56 | 0.63 | 0.18 | 1.03 | 0.81 |
| 11JY1385 | C5 RIL 159 | 79  | NP   | 1   | 52.40 | 41.25 | 9.35  | 3.42 | 0.65 | 0.19 | 0.79 | 0.84 |
| 11JY1387 | C5 RIL 161 | 80  | NP   | 1   | 46.50 | 38.27 | 6.91  | 1.92 | 0.47 | 0.11 | 0.82 | 0.58 |
| 11JY1388 | C5 RIL 162 | 81  | NP   | 1   | 54.40 | 35.80 | 5.37  | 1.63 | 0.43 | 0.13 | 0.66 | 0.56 |
| 11JY1389 | C5 RIL 163 | 82  | NP   | 1   | 49.80 | 30.25 | 6.80  | 1.90 | 0.52 | 0.13 | 0.61 | 0.65 |
| 11JY1391 | C5 RIL 165 | 83  | NP   | 1   | 52.30 | 33.20 | 8.53  | 1.25 | 0.62 | 0.21 | 0.63 | 0.83 |
| 11JY1394 | C5 RIL 169 | 84  | NP   | 1   | 33.60 | 31.80 | 2.72  | 0.60 | 0.21 | 0.10 | 0.95 | 0.31 |
| 11JY1396 | C5 RIL 171 | 85  | NP   | 1   | 42.73 | 21.83 | 3.76  | 1.00 | 0.30 | 0.39 | 0.51 | 0.69 |
| 11JY1397 | C5 RIL 172 | 86  | NP   | 1   | 51.55 | 34.05 | 6.34  | 1.87 | 0.53 | 0.14 | 0.66 | 0.67 |
| 11JY1399 | C5 RIL 174 | 87  | NP   | 1   | 43.00 | 24.00 | 7.47  | 2.29 | 0.61 | 0.19 | 0.56 | 0.80 |
| 11JY1400 | C5 RIL 176 | 88  | NP   | 1   | 47.93 | 39.37 | 9.61  | 2.69 | 0.65 | 0.24 | 0.82 | 0.89 |
| 11JY1401 | C5 RIL 177 | 89  | NP   | 1   | 45.63 | 41.73 | 7.70  | 3.06 | 0.62 | 0.20 | 0.91 | 0.82 |
| 11JY1402 | C5 RIL 178 | 90  | NP   | 1   | 47.00 | 29.20 | 5.98  | 1.74 | 0.48 | 0.14 | 0.62 | 0.62 |
| 11JY1404 | C5 RIL 182 | 91  | NP   | 1   | 37.30 | 28.25 | 4.76  | 1.39 | 0.39 | 0.15 | 0.76 | 0.54 |
| 11JY1405 | C5 RIL 183 | 92  | NP   | 1   | 40.07 | 30.77 | 8.13  | 3.40 | 0.65 | 0.22 | 0.77 | 0.87 |
| 11JY1406 | C5 RIL 184 | 93  | NP   | 1   | 41.00 | 40.00 | 6.72  | 2.82 | 0.51 | 0.22 | 0.98 | 0.73 |
| 11JY1409 | C5 RIL 187 | 94  | NP   | 1   | 42.60 | 32.90 | 5.77  | 2.30 | 0.46 | 0.17 | 0.77 | 0.63 |
| 11JY1410 | C5 RIL 188 | 95  | NP   | 1   | 31.00 | 30.75 | 4.53  | 1.29 | 0.39 | 0.13 | 0.99 | 0.52 |

| Seed ID  | Acc        | Gen | trt. | rep | SL    | RL    | SFW   | RFW  | SDW  | RDW  | RSR  | TDM  |
|----------|------------|-----|------|-----|-------|-------|-------|------|------|------|------|------|
| 11JY1412 | C5 RIL 191 | 96  | NP   | 1   | 52.40 | 45.23 | 12.56 | 3.61 | 1.05 | 0.36 | 0.86 | 1.41 |
| 11JY1413 | C5 RIL 192 | 97  | NP   | 1   | 44.50 | 40.30 | 6.63  | 2.28 | 0.56 | 0.21 | 0.91 | 0.77 |
| 11JY1414 | C5 RIL 193 | 98  | NP   | 1   | 34.10 | 46.97 | 4.93  | 1.32 | 0.41 | 0.17 | 1.38 | 0.58 |
| 11JY1416 | C5 RIL 195 | 99  | NP   | 1   | 44.20 | 28.30 | 6.58  | 1.02 | 0.66 | 0.25 | 0.64 | 0.91 |
| 11JY1418 | C5 RIL 198 | 100 | NP   | 1   | 37.85 | 36.85 | 5.94  | 1.95 | 0.48 | 0.20 | 0.97 | 0.68 |
| 11JY1420 | C5 RIL 200 | 101 | NP   | 1   | 43.50 | 31.00 | 9.21  | 1.42 | 0.80 | 0.19 | 0.71 | 0.99 |
| 11JY1421 | C5 RIL 203 | 102 | NP   | 1   | 37.15 | 33.25 | 6.27  | 1.77 | 0.47 | 0.19 | 0.90 | 0.66 |
| 11JY1422 | C5 RIL 204 | 103 | NP   | 1   | 41.30 | 39.90 | 6.89  | 1.88 | 0.54 | 0.17 | 0.97 | 0.71 |
| 11JY1423 | C5 RIL 205 | 104 | NP   | 1   | 44.80 | 42.97 | 7.10  | 1.64 | 0.59 | 0.16 | 0.96 | 0.75 |
| 11JY1424 | C5 RIL 206 | 105 | NP   | 1   | 52.67 | 45.57 | 8.33  | 2.86 | 0.67 | 0.24 | 0.87 | 0.91 |
| 11JY1425 | C5 RIL 207 | 106 | NP   | 1   | 34.30 | 31.80 | 4.04  | 2.15 | 0.29 | 0.14 | 0.93 | 0.43 |
| 11JY1426 | C5 RIL 208 | 107 | NP   | 1   | 33.40 | 32.40 | 9.18  | 4.96 | 0.54 | 0.29 | 0.97 | 0.83 |
| 11JY1428 | C5 RIL 210 | 108 | NP   | 1   | 43.67 | 34.33 | 10.69 | 5.33 | 0.77 | 0.28 | 0.79 | 1.05 |
| 11JY1429 | C5 RIL 211 | 109 | NP   | 1   | 64.88 | 34.13 | 2.39  | 1.68 | 0.46 | 0.12 | 0.53 | 0.58 |
| 11JY1429 | C5 RIL 211 | 110 | NP   | 1   | 27.10 | 28.70 | 12.35 | 1.45 | 0.25 | 0.11 | 1.06 | 0.36 |
| 11JY1431 | C5 RIL 214 | 111 | NP   | 1   | 39.80 | 34.85 | 8.95  | 4.29 | 0.62 | 0.24 | 0.88 | 0.86 |
| 11JY1433 | C5 RIL 216 | 112 | NP   | 1   | 28.55 | 27.05 | 3.93  | 1.83 | 0.32 | 0.15 | 0.95 | 0.47 |
| 11JY1434 | C5 RIL 217 | 113 | NP   | 1   | 30.80 | 21.00 | 3.67  | 1.21 | 0.25 | 0.10 | 0.68 | 0.35 |
| 11JY1435 | C5 RIL 218 | 114 | NP   | 1   | 31.00 | 25.00 | 4.74  | 2.00 | 0.40 | 0.12 | 0.81 | 0.52 |
| 11JY1437 | C5 RIL 220 | 115 | NP   | 1   | 48.80 | 28.30 | 8.53  | 3.43 | 0.65 | 0.23 | 0.58 | 0.88 |
| 11JY1440 | C5 RIL 225 | 116 | NP   | 1   | 30.60 | 31.40 | 3.63  | 1.53 | 0.22 | 0.10 | 1.03 | 0.32 |
| 11JY1442 | C5 RIL 227 | 117 | NP   | 1   | 36.77 | 35.43 | 9.97  | 4.47 | 0.65 | 0.25 | 0.96 | 0.90 |
| 11JY1444 | C5 RIL 229 | 118 | NP   | 1   | 38.50 | 23.20 | 10.92 | 3.00 | 0.45 | 0.27 | 0.60 | 0.72 |
| 11JY1454 | C5 RIL 240 | 119 | NP   | 1   | 34.60 | 29.00 | 7.35  | 2.20 | 0.48 | 0.15 | 0.84 | 0.63 |
| 11JY1455 | C5 RIL 241 | 120 | NP   | 1   | 36.35 | 23.30 | 5.17  | 1.43 | 0.36 | 0.13 | 0.64 | 0.49 |
| 11JY1456 | C5 RIL 243 | 121 | NP   | 1   | 44.05 | 38.75 | 10.04 | 3.64 | 0.75 | 0.23 | 0.88 | 0.98 |
| 11JY1459 | C5 RIL P2  | 122 | NP   | 1   | 38.90 | 43.35 | 7.36  | 2.97 | 0.57 | 0.20 | 1.11 | 0.77 |
| 11JY1460 | C5 RIL P1  | 123 | NP   | 1   | 40.00 | 31.50 | 7.83  | 3.32 | 0.54 | 0.21 | 0.79 | 0.75 |
| 11JY1461 | C6 RIL 3   | 124 | NP   | 1   | 50.70 | 26.30 | 5.09  | 0.80 | 0.44 | 0.13 | 0.52 | 0.57 |
| 11JY1462 | C6 RIL 14  | 125 | NP   | 1   | 57.10 | 40.77 | 7.33  | 2.73 | 0.53 | 0.14 | 0.71 | 0.67 |
| 11JY1463 | C6 RIL 23  | 126 | NP   | 1   | 68.00 | 43.67 | 15.06 | 5.57 | 1.07 | 0.36 | 0.64 | 1.43 |
| 11JY1464 | C6 RIL 24  | 127 | NP   | 1   | 47.67 | 38.33 | 10.18 | 4.28 | 0.97 | 0.30 | 0.80 | 1.27 |
| 11JY1465 | C6 RIL 25  | 128 | NP   | 1   | 61.50 | 52.50 | 19.50 | 6.47 | 1.30 | 0.42 | 0.85 | 1.72 |
| 11JY1466 | C6 RIL 29  | 129 | NP   | 1   | 51.83 | 41.13 | 12.28 | 4.11 | 0.94 | 0.26 | 0.79 | 1.20 |
| 11JY1468 | C6 RIL 144 | 130 | NP   | 1   | 80.50 | 43.40 | 26.44 | 8.23 | 2.15 | 0.63 | 0.54 | 2.78 |
| 11JY1469 | C6 RIL 203 | 131 | NP   | 1   | 64.97 | 35.30 | 18.08 | 8.13 | 1.19 | 0.41 | 0.54 | 1.60 |

| Seed ID  | Acc        | Gen | trt. | rep | SL    | RL    | SFW   | RFW  | SDW  | RDW  | RSR  | TDM  |
|----------|------------|-----|------|-----|-------|-------|-------|------|------|------|------|------|
| 11JY1470 | C6 RIL 212 | 132 | NP   | 1   | 43.80 | 35.70 | 16.23 | 3.72 | 1.37 | 0.31 | 0.82 | 1.68 |
| 11JY1472 | C6 RIL 219 | 133 | NP   | 1   | 61.40 | 53.80 | 14.64 | 5.00 | 1.15 | 0.34 | 0.88 | 1.49 |
| 11JY1473 | C6 RIL 239 | 134 | NP   | 1   | 66.70 | 50.50 | 16.11 | 6.22 | 1.20 | 0.49 | 0.76 | 1.69 |
| 11JY1474 | C6 RIL 243 | 135 | NP   | 1   | 51.33 | 44.93 | 13.54 | 5.22 | 1.12 | 0.53 | 0.88 | 1.65 |
| 11JY1475 | C6 RIL 272 | 136 | NP   | 1   | 54.47 | 49.10 | 7.42  | 3.29 | 0.54 | 0.16 | 0.90 | 0.70 |
| 11JY1476 | C6 RIL 273 | 137 | NP   | 1   | 51.33 | 44.93 | 13.54 | 5.22 | 1.12 | 0.53 | 0.88 | 1.65 |
| 11JY1477 | C6 RIL 283 | 138 | NP   | 1   | 67.53 | 37.50 | 15.37 | 4.36 | 1.25 | 0.45 | 0.56 | 1.70 |
| 11JY1478 | C6 RIL 293 | 139 | NP   | 1   | 72.17 | 42.80 | 19.24 | 5.11 | 1.39 | 0.42 | 0.59 | 1.81 |
| 11JY1479 | C6 RIL 298 | 140 | NP   | 1   | 44.50 | 41.70 | 7.28  | 1.40 | 0.96 | 0.18 | 0.94 | 1.14 |
| 11JY1480 | C6 RIL 303 | 141 | NP   | 1   | 49.70 | 39.90 | 12.99 | 3.05 | 0.98 | 0.30 | 0.80 | 1.28 |
| 11JY1481 | C6 RIL 327 | 142 | NP   | 1   | 32.50 | 28.00 | 4.28  | 2.24 | 0.42 | 0.24 | 0.86 | 0.66 |
| 11JY1482 | C6 RIL 341 | 143 | NP   | 1   | 51.00 | 34.00 | 11.56 | 4.70 | 0.92 | 0.37 | 0.67 | 1.29 |
| 11JY1483 | C6 RIL 348 | 144 | NP   | 1   | 17.00 | 26.00 | 1.30  | 0.92 | 0.15 | 0.08 | 1.53 | 0.23 |
| 11JY1484 | C6 RIL 402 | 145 | NP   | 1   | 46.00 | 41.00 | 9.68  | 5.38 | 0.80 | 0.36 | 0.89 | 1.16 |
| 11JY1485 | C6 RIL 403 | 146 | NP   | 1   | 20.00 | 28.00 | 1.80  | 0.80 | 0.17 | 0.10 | 1.40 | 0.27 |
| 11JY1487 | C6 RIL 5   | 147 | NP   | 1   | 50.93 | 43.10 | 4.78  | 2.63 | 0.38 | 0.14 | 0.85 | 0.52 |
| 11JY1488 | C6 RIL 7   | 148 | NP   | 1   | 36.00 | 41.50 | 7.12  | 2.01 | 0.54 | 0.23 | 1.15 | 0.77 |
| 11JY1489 | C6 RIL 10  | 149 | NP   | 1   | 59.10 | 40.20 | 17.57 | 5.89 | 1.30 | 0.48 | 0.68 | 1.78 |
| 11JY1490 | C6 RIL 15  | 150 | NP   | 1   | 65.30 | 45.20 | 16.36 | 7.01 | 1.23 | 0.45 | 0.69 | 1.68 |
| 11JY1491 | C6 RIL 19  | 151 | NP   | 1   | 50.07 | 40.00 | 8.41  | 3.27 | 0.59 | 0.22 | 0.80 | 0.81 |
| 11JY1493 | C6 RIL 21  | 152 | NP   | 1   | 56.90 | 23.59 | 11.36 | 3.91 | 1.07 | 0.34 | 0.41 | 1.41 |
| 11JY1494 | C6 RIL 23  | 153 | NP   | 1   | 51.20 | 45.07 | 8.26  | 3.51 | 0.65 | 0.27 | 0.88 | 0.92 |
| 11JY1495 | C6 RIL 24  | 154 | NP   | 1   | 49.03 | 48.20 | 9.75  | 3.74 | 0.73 | 0.34 | 0.98 | 1.07 |
| 11JY1496 | C6 RIL 25  | 155 | NP   | 1   | 50.40 | 45.03 | 9.81  | 2.62 | 0.69 | 0.25 | 0.89 | 0.94 |
| 11JY1497 | C6 RIL 28  | 156 | NP   | 1   | 33.60 | 38.90 | 3.47  | 0.70 | 0.30 | 0.15 | 1.16 | 0.45 |
| 11JY1498 | C6 RIL 29  | 157 | NP   | 1   | 36.73 | 38.70 | 8.55  | 3.82 | 0.61 | 0.28 | 1.05 | 0.89 |
| 11JY1499 | C6 RIL 30  | 158 | NP   | 1   | 51.27 | 43.60 | 5.16  | 2.51 | 0.44 | 0.16 | 0.85 | 0.60 |
| 11JY1500 | C6 RIL 31  | 159 | NP   | 1   | 49.67 | 34.10 | 10.58 | 3.47 | 0.94 | 0.33 | 0.69 | 1.27 |
| 11JY1501 | C6 RIL 32  | 160 | NP   | 1   | 63.37 | 43.93 | 14.81 | 4.92 | 1.27 | 0.41 | 0.69 | 1.68 |
| 11JY1502 | C6 RIL 33  | 161 | NP   | 1   | 44.10 | 31.20 | 4.54  | 1.18 | 0.35 | 0.10 | 0.71 | 0.45 |
| 11JY1503 | C6 RIL 36  | 162 | NP   | 1   | 64.97 | 43.27 | 19.12 | 7.78 | 1.34 | 0.48 | 0.67 | 1.82 |
| 11JY1504 | C6 RIL 39  | 163 | NP   | 1   | 47.93 | 46.57 | 12.47 | 4.18 | 0.83 | 0.29 | 0.97 | 1.12 |
| 11JY1505 | C6 RIL 40  | 164 | NP   | 1   | 56.40 | 61.55 | 15.07 | 4.52 | 1.00 | 0.43 | 1.09 | 1.43 |
| 11JY1506 | C6 RIL 42  | 165 | NP   | 1   | 57.13 | 30.47 | 12.31 | 3.04 | 1.02 | 0.35 | 0.53 | 1.37 |
| 11JY1508 | C6 RIL 47  | 166 | NP   | 1   | 63.67 | 47.77 | 17.15 | 4.15 | 1.13 | 0.41 | 0.75 | 1.54 |
| 11JY1509 | C6 RIL 49  | 167 | NP   | 1   | 47.70 | 30.30 | 11.81 | 1.45 | 0.15 | 0.12 | 0.64 | 0.27 |

| Seed ID  | Acc        | Gen | trt. | rep | SL    | RL    | SFW   | RFW  | SDW  | RDW  | RSR  | TDM  |
|----------|------------|-----|------|-----|-------|-------|-------|------|------|------|------|------|
| 11JY1510 | C6 RIL 50  | 168 | NP   | 1   | 60.97 | 45.67 | 18.69 | 4.47 | 1.19 | 0.44 | 0.75 | 1.63 |
| 11JY1511 | C6 RIL 52  | 169 | NP   | 1   | 52.00 | 30.50 | 7.15  | 3.50 | 0.60 | 0.19 | 0.59 | 0.79 |
| 11JY1512 | C6 RIL 53  | 170 | NP   | 1   | 74.30 | 60.60 | 21.05 | 5.64 | 1.40 | 0.44 | 0.82 | 1.84 |
| 11JY1513 | C6 RIL 57  | 171 | NP   | 1   | 59.20 | 49.85 | 16.09 | 4.75 | 1.23 | 0.46 | 0.84 | 1.69 |
| 11JY1514 | C6 RIL 58  | 172 | NP   | 1   | 70.10 | 36.40 | 16.60 | 7.42 | 1.93 | 0.75 | 0.52 | 2.68 |
| 11JY1515 | C6 RIL 59  | 173 | NP   | 1   | 52.45 | 37.25 | 9.14  | 1.85 | 0.63 | 0.22 | 0.71 | 0.85 |
| 11JY1516 | C6 RIL 60  | 174 | NP   | 1   | 45.20 | 42.25 | 8.15  | 2.96 | 0.57 | 0.24 | 0.93 | 0.81 |
| 11JY1517 | C6 RIL 64  | 175 | NP   | 1   | 62.97 | 27.97 | 10.72 | 2.42 | 0.96 | 0.23 | 0.44 | 1.19 |
| 11JY1518 | C6 RIL 65  | 176 | NP   | 1   | 70.17 | 51.03 | 19.07 | 4.34 | 1.04 | 0.32 | 0.73 | 1.36 |
| 11JY1519 | C6 RIL 66  | 177 | NP   | 1   | 67.90 | 48.55 | 18.64 | 6.31 | 1.19 | 0.36 | 0.72 | 1.55 |
| 11JY1520 | C6 RIL 68  | 178 | NP   | 1   | 40.20 | 43.50 | 6.47  | 2.36 | 0.44 | 0.13 | 1.08 | 0.57 |
| 11JY1521 | C6 RIL 69  | 179 | NP   | 1   | 53.40 | 48.95 | 12.15 | 4.46 | 0.77 | 0.28 | 0.92 | 1.05 |
| 11JY1522 | C6 RIL 70  | 180 | NP   | 1   | 53.70 | 45.67 | 8.76  | 2.69 | 0.46 | 0.12 | 0.85 | 0.58 |
| 11JY1523 | C6 RIL 72  | 181 | NP   | 1   | 55.70 | 58.60 | 18.06 | 6.12 | 1.15 | 0.41 | 1.05 | 1.56 |
| 11JY1524 | C6 RIL 74  | 182 | NP   | 1   | 57.40 | 51.10 | 13.36 | 4.35 | 0.82 | 0.31 | 0.89 | 1.13 |
| 11JY1525 | C6 RIL 76  | 183 | NP   | 1   | 48.67 | 46.53 | 10.01 | 2.74 | 0.68 | 0.32 | 0.96 | 1.00 |
| 11JY1527 | C6 RIL 79  | 184 | NP   | 1   | 48.25 | 39.85 | 8.02  | 1.75 | 0.62 | 0.23 | 0.83 | 0.85 |
| 11JY1528 | C6 RIL 83  | 185 | NP   | 1   | 65.03 | 29.00 | 14.73 | 3.80 | 1.13 | 0.36 | 0.45 | 1.49 |
| 11JY1529 | C6 RIL 85  | 186 | NP   | 1   | 56.30 | 47.87 | 14.27 | 3.54 | 0.99 | 0.33 | 0.85 | 1.32 |
| 11JY1530 | C6 RIL 86  | 187 | NP   | 1   | 59.60 | 40.25 | 13.25 | 2.06 | 0.93 | 0.24 | 0.68 | 1.17 |
| 11JY1531 | C6 RIL 91  | 188 | NP   | 1   | 63.97 | 37.43 | 21.37 | 4.51 | 1.68 | 0.41 | 0.59 | 2.09 |
| 11JY1532 | C6 RIL 94  | 189 | NP   | 1   | 56.87 | 38.60 | 10.71 | 2.72 | 0.76 | 0.17 | 0.68 | 0.93 |
| 11JY1533 | C6 RIL 95  | 190 | NP   | 1   | 56.93 | 48.07 | 8.52  | 3.14 | 0.61 | 0.19 | 0.84 | 0.80 |
| 11JY1534 | C6 RIL 97  | 191 | NP   | 1   | 48.70 | 46.53 | 6.76  | 1.90 | 0.42 | 0.11 | 0.96 | 0.53 |
| 11JY1535 | C6 RIL 103 | 192 | NP   | 1   | 21.65 | 35.35 | 1.22  | 0.70 | 0.10 | 0.07 | 1.63 | 0.17 |
| 11JY1536 | C6 RIL 104 | 193 | NP   | 1   | 48.97 | 44.93 | 8.20  | 2.99 | 0.59 | 0.18 | 0.92 | 0.77 |
| 11JY1537 | C6 RIL 107 | 194 | NP   | 1   | 43.27 | 25.77 | 4.62  | 1.19 | 0.31 | 0.08 | 0.60 | 0.39 |
| 11JY1538 | C6 RIL 108 | 195 | NP   | 1   | 54.00 | 42.90 | 10.75 | 2.97 | 0.69 | 0.20 | 0.79 | 0.89 |
| 11JY1539 | C6 RIL 109 | 196 | NP   | 1   | 30.85 | 29.30 | 1.98  | 1.10 | 0.16 | 0.07 | 0.95 | 0.23 |
| 11JY1540 | C6 RIL 112 | 197 | NP   | 1   | 62.07 | 33.57 | 10.22 | 3.34 | 0.62 | 0.17 | 0.54 | 0.79 |
| 11JY1541 | C6 RIL 113 | 198 | NP   | 1   | 60.53 | 39.43 | 14.13 | 3.16 | 0.74 | 0.28 | 0.65 | 1.02 |
| 11JY1542 | C6 RIL 115 | 199 | NP   | 1   | 65.87 | 29.10 | 13.16 | 2.47 | 0.86 | 0.26 | 0.44 | 1.12 |
| 11JY1543 | C6 RIL 116 | 200 | NP   | 1   | 39.35 | 36.30 | 4.40  | 0.56 | 0.34 | 0.13 | 0.92 | 0.47 |
| 11JY1544 | C6 RIL 117 | 201 | NP   | 1   | 55.60 | 40.35 | 6.79  | 0.87 | 0.53 | 0.19 | 0.73 | 0.72 |
| 11JY1545 | C6 RIL 120 | 202 | NP   | 1   | 65.07 | 53.10 | 8.87  | 2.76 | 0.62 | 0.16 | 0.82 | 0.78 |
| 11JY1546 | C6 RIL 121 | 203 | NP   | 1   | 66.65 | 37.35 | 16.03 | 1.77 | 1.31 | 0.37 | 0.56 | 1.68 |

| Seed ID  | Acc        | Gen | trt. | rep | SL    | RL    | SFW   | RFW  | SDW  | RDW  | RSR  | TDM  |
|----------|------------|-----|------|-----|-------|-------|-------|------|------|------|------|------|
| 11JY1547 | C6 RIL 123 | 204 | NP   | 1   | 65.90 | 37.05 | 19.02 | 3.25 | 1.50 | 0.56 | 0.56 | 2.06 |
| 11JY1548 | C6 RIL 124 | 205 | NP   | 1   | 48.70 | 44.10 | 9.04  | 0.99 | 0.70 | 0.22 | 0.91 | 0.92 |
| 11JY1549 | C6 RIL 127 | 206 | NP   | 1   | 51.20 | 33.25 | 9.32  | 2.74 | 0.73 | 0.20 | 0.65 | 0.93 |
| 11JY1550 | C6 RIL 131 | 207 | NP   | 1   | 54.30 | 47.60 | 10.87 | 4.07 | 0.88 | 0.30 | 0.88 | 1.18 |
| 11JY1551 | C6 RIL 134 | 208 | NP   | 1   | 60.70 | 35.15 | 11.18 | 8.46 | 0.95 | 0.27 | 0.58 | 1.22 |
| 11JY1552 | C6 RIL 135 | 209 | NP   | 1   | 63.17 | 37.43 | 15.71 | 4.82 | 1.10 | 0.30 | 0.59 | 1.40 |
| 11JY1553 | C6 RIL 138 | 210 | NP   | 1   | 61.43 | 43.03 | 11.76 | 3.81 | 0.87 | 0.28 | 0.70 | 1.15 |
| 11JY1554 | C6 RIL 139 | 211 | NP   | 1   | 37.90 | 33.40 | 5.47  | 1.41 | 0.32 | 0.11 | 0.88 | 0.43 |
| 11JY1555 | C6 RIL 140 | 212 | NP   | 1   | 59.30 | 38.20 | 12.23 | 3.10 | 1.64 | 0.38 | 0.64 | 2.02 |
| 11JY1556 | C6 RIL 141 | 213 | NP   | 1   | 45.77 | 38.93 | 4.27  | 0.90 | 0.34 | 0.10 | 0.85 | 0.44 |
| 11JY1557 | C6 RIL 142 | 214 | NP   | 1   | 80.80 | 46.55 | 23.10 | 6.38 | 1.61 | 0.46 | 0.58 | 2.07 |
| 11JY1558 | C6 RIL 143 | 215 | NP   | 1   | 61.40 | 42.80 | 9.70  | 1.81 | 0.74 | 0.18 | 0.70 | 0.92 |
| 11JY1560 | C6 RIL 146 | 216 | NP   | 1   | 51.03 | 37.93 | 6.77  | 1.41 | 0.49 | 0.15 | 0.74 | 0.64 |
| 11JY1561 | C6 RIL 147 | 217 | NP   | 1   | 28.60 | 27.50 | 2.30  | 0.36 | 0.19 | 0.10 | 0.96 | 0.29 |
| 11JY1562 | C6 RIL 148 | 218 | NP   | 1   | 47.50 | 45.35 | 6.93  | 1.67 | 0.57 | 0.23 | 0.95 | 0.80 |
| 11JY1563 | C6 RIL 150 | 219 | NP   | 1   | 51.80 | 40.60 | 5.41  | 1.00 | 0.44 | 0.15 | 0.78 | 0.59 |
| 11JY1565 | C6 RIL 153 | 220 | NP   | 1   | 45.25 | 43.10 | 8.53  | 1.32 | 0.65 | 0.20 | 0.95 | 0.85 |
| 11JY1566 | C6 RIL 156 | 221 | NP   | 1   | 56.50 | 42.20 | 5.06  | 0.55 | 0.33 | 0.10 | 0.75 | 0.43 |
| 11JY1567 | C6 RIL 160 | 222 | NP   | 1   | 65.07 | 43.33 | 11.87 | 4.52 | 0.93 | 0.26 | 0.67 | 1.19 |
| 11JY1568 | C6 RIL 161 | 223 | NP   | 1   | 57.55 | 42.00 | 9.48  | 3.19 | 0.70 | 0.21 | 0.73 | 0.91 |
| 11JY1569 | C6 RIL 162 | 224 | NP   | 1   | 56.25 | 36.75 | 7.73  | 2.55 | 0.60 | 0.17 | 0.65 | 0.77 |
| 11JY1570 | C6 RIL 163 | 225 | NP   | 1   | 46.57 | 33.60 | 6.93  | 2.57 | 0.49 | 0.13 | 0.72 | 0.62 |
| 11JY1571 | C6 RIL 164 | 226 | NP   | 1   | 56.70 | 37.70 | 9.21  | 2.50 | 0.58 | 0.23 | 0.66 | 0.81 |
| 11JY1572 | C6 RIL 169 | 227 | NP   | 1   | 58.83 | 34.47 | 7.13  | 1.22 | 0.61 | 0.12 | 0.59 | 0.73 |
| 11JY1573 | C6 RIL 171 | 228 | NP   | 1   | 65.80 | 30.53 | 9.78  | 1.39 | 0.72 | 0.14 | 0.46 | 0.86 |
| 11JY1574 | C6 RIL 172 | 229 | NP   | 1   | 63.70 | 53.10 | 12.62 | 4.19 | 0.89 | 0.33 | 0.83 | 1.22 |
| 11JY1576 | C6 RIL 174 | 230 | NP   | 1   | 36.50 | 30.10 | 2.97  | 1.02 | 0.23 | 0.10 | 0.82 | 0.33 |
| 11JY1577 | C6 RIL 175 | 231 | NP   | 1   | 42.40 | 30.20 | 3.85  | 0.75 | 0.38 | 0.12 | 0.71 | 0.50 |
| 11JY1578 | C6 RIL 176 | 232 | NP   | 1   | 40.35 | 26.45 | 4.16  | 0.71 | 0.35 | 0.13 | 0.66 | 0.48 |
| 11JY1579 | C6 RIL 179 | 233 | NP   | 1   | 31.30 | 37.25 | 2.82  | 0.33 | 0.24 | 0.08 | 1.19 | 0.32 |
| 11JY1580 | C6 RIL 181 | 234 | NP   | 1   | 50.65 | 37.05 | 5.17  | 0.78 | 0.54 | 0.12 | 0.73 | 0.66 |
| 11JY1581 | C6 RIL 184 | 235 | NP   | 1   | 70.40 | 33.20 | 7.90  | 1.83 | 0.31 | 0.10 | 0.47 | 0.41 |
| 11JY1582 | C6 RIL 186 | 236 | NP   | 1   | 52.90 | 41.10 | 10.61 | 5.35 | 0.74 | 0.30 | 0.78 | 1.04 |
| 11JY1583 | C6 RIL 187 | 237 | NP   | 1   | 32.60 | 35.50 | 2.99  | 0.56 | 0.30 | 0.13 | 1.09 | 0.43 |
| 11JY1584 | C6 RIL 188 | 238 | NP   | 1   | 45.50 | 48.05 | 6.60  | 1.88 | 0.53 | 0.21 | 1.06 | 0.74 |
| 11JY1585 | C6 RIL 189 | 239 | NP   | 1   | 53.40 | 37.60 | 9.51  | 1.86 | 0.75 | 0.25 | 0.70 | 1.00 |

| Seed ID  | Acc        | Gen | trt. | rep | SL    | RL    | SFW   | RFW  | SDW  | RDW  | RSR  | TDM  |
|----------|------------|-----|------|-----|-------|-------|-------|------|------|------|------|------|
| 11JY1586 | C6 RIL 190 | 240 | NP   | 1   | 60.47 | 34.83 | 6.72  | 1.40 | 0.52 | 0.14 | 0.58 | 0.66 |
| 11JY1587 | C6 RIL 192 | 241 | NP   | 1   | 43.10 | 35.30 | 3.69  | 0.80 | 0.29 | 0.10 | 0.82 | 0.39 |
| 11JY1588 | C6 RIL 193 | 242 | NP   | 1   | 59.10 | 46.65 | 7.70  | 2.42 | 0.52 | 0.15 | 0.79 | 0.67 |
| 11JY1589 | C6 RIL 203 | 243 | NP   | 1   | 63.87 | 44.60 | 9.01  | 2.03 | 0.59 | 0.15 | 0.70 | 0.74 |
| 11JY1590 | C6 RIL 204 | 244 | NP   | 1   | 51.40 | 39.35 | 6.38  | 1.95 | 0.44 | 0.13 | 0.77 | 0.57 |
| 11JY1591 | C6 RIL 205 | 245 | NP   | 1   | 45.33 | 37.63 | 4.45  | 0.94 | 0.26 | 0.10 | 0.83 | 0.36 |
| 11JY1592 | C6 RIL 206 | 246 | NP   | 1   | 42.60 | 46.50 | 3.54  | 1.00 | 0.26 | 0.10 | 1.09 | 0.36 |
| 11JY1593 | C6 RIL 207 | 247 | NP   | 1   | 54.73 | 31.93 | 9.22  | 3.51 | 0.72 | 0.24 | 0.58 | 0.96 |
| 11JY1594 | C6 RIL 211 | 248 | NP   | 1   | 45.33 | 28.63 | 3.95  | 0.74 | 0.27 | 0.10 | 0.63 | 0.37 |
| 11JY1595 | C6 RIL 212 | 249 | NP   | 1   | 60.90 | 39.47 | 9.02  | 1.76 | 0.61 | 0.15 | 0.65 | 0.76 |
| 11JY1596 | C6 RIL 217 | 250 | NP   | 1   | 40.60 | 28.90 | 3.59  | 0.35 | 0.30 | 0.11 | 0.71 | 0.41 |
| 11JY1597 | C6 RIL 218 | 251 | NP   | 1   | 57.75 | 35.70 | 7.75  | 1.47 | 0.52 | 0.12 | 0.62 | 0.64 |
| 11JY1598 | C6 RIL 219 | 252 | NP   | 1   | 67.25 | 52.10 | 10.48 | 2.17 | 0.79 | 0.18 | 0.77 | 0.97 |
| 11JY1599 | C6 RIL 220 | 253 | NP   | 1   | 50.05 | 35.40 | 5.53  | 0.92 | 0.55 | 0.21 | 0.71 | 0.76 |
| 11JY1600 | C6 RIL 225 | 254 | NP   | 1   | 57.47 | 29.33 | 11.27 | 3.01 | 0.80 | 0.21 | 0.51 | 1.01 |
| 11JY1601 | C6 RIL 230 | 255 | NP   | 1   | 56.80 | 60.55 | 9.55  | 3.74 | 0.66 | 0.24 | 1.07 | 0.90 |
| 11JY1602 | C6 RIL 231 | 256 | NP   | 1   | 62.35 | 47.40 | 10.00 | 4.03 | 0.79 | 0.26 | 0.76 | 1.05 |
| 11JY1603 | C6 RIL 232 | 257 | NP   | 1   | 59.60 | 51.90 | 12.43 | 5.33 | 0.90 | 0.33 | 0.87 | 1.23 |
| 11JY1604 | C6 RIL 234 | 258 | NP   | 1   | 70.90 | 51.25 | 14.60 | 5.90 | 1.08 | 0.31 | 0.72 | 1.39 |
| 11JY1605 | C6 RIL 235 | 259 | NP   | 1   | 63.70 | 44.70 | 12.91 | 5.82 | 0.94 | 0.37 | 0.70 | 1.31 |
| 11JY1606 | C6 RIL 236 | 260 | NP   | 1   | 52.35 | 47.20 | 9.08  | 5.74 | 0.67 | 0.28 | 0.90 | 0.95 |
| 11JY1607 | C6 RIL 238 | 261 | NP   | 1   | 53.73 | 38.07 | 10.74 | 2.39 | 0.70 | 0.16 | 0.71 | 0.86 |
| 11JY1608 | C6 RIL 239 | 262 | NP   | 1   | 41.80 | 30.20 | 1.64  | 0.37 | 0.55 | 0.14 | 0.72 | 0.69 |
| 11JY1609 | C6 RIL 241 | 263 | NP   | 1   | 66.23 | 44.67 | 15.26 | 6.44 | 1.03 | 0.39 | 0.67 | 1.42 |
| 11JY1610 | C6 RIL 243 | 264 | NP   | 1   | 62.40 | 58.13 | 12.20 | 6.77 | 0.95 | 0.38 | 0.93 | 1.33 |
| 11JY1611 | C6 RIL 245 | 265 | NP   | 1   | 47.35 | 51.75 | 8.34  | 2.73 | 0.62 | 0.16 | 1.09 | 0.78 |
| 11JY1612 | C6 RIL 249 | 266 | NP   | 1   | 44.64 | 35.03 | 3.68  | 1.35 | 0.30 | 0.10 | 0.78 | 0.40 |
| 11JY1613 | C6 RIL 253 | 267 | NP   | 1   | 58.83 | 53.53 | 12.82 | 3.29 | 1.00 | 0.25 | 0.91 | 1.25 |
| 11JY1614 | C6 RIL 258 | 268 | NP   | 1   | 60.00 | 44.20 | 9.60  | 3.39 | 0.64 | 0.22 | 0.74 | 0.86 |
| 11JY1616 | C6 RIL 261 | 269 | NP   | 1   | 47.50 | 39.60 | 5.29  | 1.37 | 0.41 | 0.13 | 0.83 | 0.54 |
| 11JY1617 | C6 RIL 262 | 270 | NP   | 1   | 46.33 | 33.13 | 6.95  | 2.47 | 0.51 | 0.17 | 0.72 | 0.68 |
| 11JY1619 | C6 RIL 265 | 271 | NP   | 1   | 66.80 | 55.20 | 12.31 | 4.00 | 0.90 | 0.20 | 0.83 | 1.10 |
| 11JY1620 | C6 RIL 267 | 272 | NP   | 1   | 58.47 | 55.87 | 10.12 | 3.42 | 0.79 | 0.18 | 0.96 | 0.97 |
| 11JY1621 | C6 RIL 268 | 273 | NP   | 1   | 47.27 | 44.37 | 1.04  | 3.83 | 0.34 | 0.13 | 0.94 | 0.47 |
| 11JY1622 | C6 RIL 270 | 274 | NP   | 1   | 58.67 | 36.07 | 10.78 | 4.52 | 0.77 | 0.23 | 0.61 | 1.00 |
| 11JY1623 | C6 RIL 272 | 275 | NP   | 1   | 66.60 | 50.30 | 12.54 | 6.14 | 0.92 | 0.32 | 0.76 | 1.24 |



| Seed ID  | Acc        | Gen | trt. | rep | SL    | RL    | SFW   | RFW  | SDW  | RDW  | RSR  | TDM  |
|----------|------------|-----|------|-----|-------|-------|-------|------|------|------|------|------|
| 11JY1624 | C6 RIL 273 | 276 | NP   | 1   | 37.80 | 32.67 | 3.76  | 0.36 | 0.25 | 0.10 | 0.86 | 0.35 |
| 11JY1625 | C6 RIL 275 | 277 | NP   | 1   | 63.70 | 31.07 | 13.39 | 4.47 | 1.10 | 0.33 | 0.49 | 1.43 |
| 11JY1626 | C6 RIL 276 | 278 | NP   | 1   | 52.50 | 42.43 | 8.55  | 3.45 | 0.83 | 0.27 | 0.81 | 1.10 |
| 11JY1627 | C6 RIL 282 | 279 | NP   | 1   | 75.80 | 41.53 | 23.40 | 9.89 | 2.14 | 0.74 | 0.55 | 2.88 |
| 11JY1628 | C6 RIL 283 | 280 | NP   | 1   | 69.47 | 36.93 | 13.48 | 3.11 | 1.14 | 0.35 | 0.53 | 1.49 |
| 11JY1629 | C6 RIL 284 | 281 | NP   | 1   | 55.75 | 39.45 | 10.41 | 4.20 | 0.83 | 0.24 | 0.71 | 1.07 |
| 11JY1630 | C6 RIL 286 | 282 | NP   | 1   | 61.00 | 48.40 | 15.62 | 6.82 | 1.43 | 0.47 | 0.79 | 1.90 |
| 11JY1631 | C6 RIL 287 | 283 | NP   | 1   | 57.70 | 61.80 | 9.73  | 4.55 | 0.78 | 0.23 | 1.07 | 1.01 |
| 11JY1632 | C6 RIL 288 | 284 | NP   | 1   | 34.70 | 33.20 | 1.75  | 0.54 | 0.16 | 0.06 | 0.96 | 0.22 |
| 11JY1633 | C6 RIL 289 | 285 | NP   | 1   | 67.30 | 51.85 | 17.40 | 7.52 | 1.69 | 0.54 | 0.77 | 2.23 |
| 11JY1634 | C6 RIL 291 | 286 | NP   | 1   | 67.30 | 51.85 | 17.40 | 7.52 | 1.69 | 0.54 | 0.77 | 2.23 |
| 11JY1635 | C6 RIL 292 | 287 | NP   | 1   | 44.70 | 44.15 | 4.91  | 2.20 | 0.45 | 0.14 | 0.99 | 0.59 |
| 11JY1636 | C6 RIL 293 | 288 | NP   | 1   | 69.77 | 50.57 | 16.86 | 6.35 | 1.45 | 0.54 | 0.72 | 1.99 |
| 11JY1637 | C6 RIL 295 | 289 | NP   | 1   | 66.80 | 54.07 | 14.93 | 2.66 | 1.17 | 0.48 | 0.81 | 1.65 |
| 11JY1638 | C6 RIL 297 | 290 | NP   | 1   | 71.00 | 36.47 | 14.86 | 4.05 | 1.03 | 0.27 | 0.51 | 1.30 |
| 11JY1639 | C6 RIL 298 | 291 | NP   | 1   | 46.45 | 45.50 | 3.99  | 1.44 | 0.68 | 0.16 | 0.98 | 0.84 |
| 11JY1640 | C6 RIL 300 | 292 | NP   | 1   | 62.60 | 36.93 | 16.45 | 4.72 | 1.33 | 0.36 | 0.59 | 1.69 |
| 11JY1641 | C6 RIL 303 | 293 | NP   | 1   | 56.17 | 56.17 | 9.71  | 3.86 | 0.86 | 0.31 | 1.00 | 1.17 |
| 11JY1642 | C6 RIL 310 | 294 | NP   | 1   | 68.50 | 64.00 | 17.98 | 8.04 | 1.48 | 0.61 | 0.93 | 2.09 |
| 11JY1643 | C6 RIL 314 | 295 | NP   | 1   | 38.85 | 28.40 | 2.29  | 0.57 | 0.21 | 0.06 | 0.73 | 0.27 |
| 11JY1644 | C6 RIL 315 | 296 | NP   | 1   | 69.50 | 40.50 | 15.31 | 6.30 | 1.00 | 0.39 | 0.58 | 1.39 |
| 11JY1645 | C6 RIL 316 | 297 | NP   | 1   | 66.50 | 59.00 | 16.56 | 5.78 | 1.08 | 0.38 | 0.89 | 1.46 |
| 11JY1646 | C6 RIL 317 | 298 | NP   | 1   | 71.00 | 46.00 | 17.13 | 7.46 | 1.22 | 0.46 | 0.65 | 1.68 |
| 11JY1647 | C6 RIL 318 | 299 | NP   | 1   | 66.75 | 39.00 | 16.45 | 5.97 | 1.48 | 0.52 | 0.58 | 2.00 |
| 11JY1648 | C6 RIL 319 | 300 | NP   | 1   | 46.00 | 47.00 | 5.54  | 1.72 | 0.42 | 0.18 | 1.02 | 0.60 |
| 11JY1649 | C6 RIL 320 | 301 | NP   | 1   | 61.00 | 48.00 | 11.36 | 4.74 | 0.82 | 0.33 | 0.79 | 1.15 |
| 11JY1650 | C6 RIL 321 | 302 | NP   | 1   | 37.00 | 40.33 | 3.12  | 0.87 | 0.24 | 0.08 | 1.09 | 0.32 |
| 11JY1651 | C6 RIL 322 | 303 | NP   | 1   | 66.50 | 54.00 | 16.35 | 5.27 | 1.16 | 0.45 | 0.81 | 1.61 |
| 11JY1652 | C6 RIL 324 | 304 | NP   | 1   | 57.53 | 43.80 | 6.79  | 1.90 | 0.54 | 0.46 | 0.76 | 1.00 |
| 11JY1653 | C6 RIL 327 | 305 | NP   | 1   | 58.57 | 45.33 | 10.60 | 3.40 | 0.76 | 0.26 | 0.77 | 1.02 |
| 11JY1654 | C6 RIL 328 | 306 | NP   | 1   | 50.27 | 32.03 | 4.12  | 1.58 | 0.35 | 0.12 | 0.64 | 0.47 |
| 11JY1655 | C6 RIL 330 | 307 | NP   | 1   | 71.17 | 53.40 | 14.81 | 6.38 | 1.01 | 0.38 | 0.75 | 1.39 |
| 11JY1656 | C6 RIL 332 | 308 | NP   | 1   | 76.00 | 55.77 | 14.91 | 6.85 | 1.03 | 0.39 | 0.73 | 1.42 |
| 11JY1657 | C6 RIL 333 | 309 | NP   | 1   | 65.00 | 49.73 | 11.92 | 5.33 | 1.01 | 0.36 | 0.77 | 1.37 |
| 11JY1658 | C6 RIL 335 | 310 | NP   | 1   | 53.00 | 49.33 | 9.96  | 4.50 | 0.91 | 0.29 | 0.93 | 1.20 |
| 11JY1659 | C6 RIL 336 | 311 | NP   | 1   | 36.50 | 34.50 | 7.37  | 4.70 | 0.60 | 0.30 | 0.95 | 0.90 |

| Seed ID  | Acc                                                                                        | Gen | trt. | rep | SL    | RL    | SFW   | RFW  | SDW  | RDW  | RSR  | TDM  |
|----------|--------------------------------------------------------------------------------------------|-----|------|-----|-------|-------|-------|------|------|------|------|------|
| 11JY1660 | C6 RIL 339                                                                                 | 312 | NP   | 1   | 46.50 | 42.33 | 7.67  | 3.35 | 0.57 | 0.20 | 0.91 | 0.77 |
| 11JY1661 | C6 RIL 340                                                                                 | 313 | NP   | 1   | 53.75 | 44.50 | 10.30 | 4.07 | 0.96 | 0.34 | 0.83 | 1.30 |
| 11JY1662 | C6 RIL 341                                                                                 | 314 | NP   | 1   | 28.67 | 34.67 | 3.34  | 1.35 | 0.28 | 0.10 | 1.21 | 0.38 |
| 11JY1663 | C6 RIL 342                                                                                 | 315 | NP   | 1   | 55.75 | 48.50 | 10.31 | 3.70 | 0.85 | 0.29 | 0.87 | 1.14 |
| 11JY1664 | C6 RIL 344                                                                                 | 316 | NP   | 1   | 28.17 | 33.67 | 3.20  | 1.60 | 0.27 | 0.13 | 1.20 | 0.40 |
| 11JY1665 | C6 RIL 346                                                                                 | 317 | NP   | 1   | 54.23 | 34.83 | 5.62  | 2.05 | 0.47 | 0.17 | 0.64 | 0.64 |
| 11JY1666 | C6 RIL 347                                                                                 | 318 | NP   | 1   | 47.25 | 49.00 | 6.80  | 2.77 | 0.57 | 0.22 | 1.04 | 0.79 |
| 11JY1667 | C6 RIL 349                                                                                 | 319 | NP   | 1   | 51.67 | 48.33 | 9.86  | 3.41 | 0.89 | 0.29 | 0.94 | 1.18 |
| 11JY1668 | C6 RIL 352                                                                                 | 320 | NP   | 1   | 40.67 | 38.00 | 3.29  | 1.08 | 0.29 | 0.14 | 0.93 | 0.43 |
| 11JY1669 | C6 RIL 354                                                                                 | 321 | NP   | 1   | 19.00 | 31.00 | 1.13  | 0.62 | 0.13 | 0.11 | 1.63 | 0.24 |
| 11JY1670 | C6 RIL 355                                                                                 | 322 | NP   | 1   | 44.00 | 52.00 | 7.92  | 3.14 | 0.73 | 0.31 | 1.18 | 1.04 |
| 11JY1671 | C6 RIL 356                                                                                 | 323 | NP   | 1   | 54.67 | 43.33 | 10.84 | 5.14 | 1.01 | 0.41 | 0.79 | 1.42 |
| 11JY1672 | C6 RIL 358                                                                                 | 324 | NP   | 1   | 49.70 | 48.00 | 8.90  | 3.27 | 0.71 | 0.21 | 0.97 | 0.92 |
| 11JY1673 | C6 RIL 361                                                                                 | 325 | NP   | 1   | 35.67 | 40.67 | 4.68  | 1.52 | 0.46 | 0.13 | 1.14 | 0.59 |
| 11JY1674 | C6 RIL 362                                                                                 | 326 | NP   | 1   | 68.83 | 54.67 | 19.14 | 5.55 | 1.31 | 0.41 | 0.79 | 1.72 |
| 11JY1675 | C6 RIL 364                                                                                 | 327 | NP   | 1   | 72.00 | 55.33 | 20.36 | 5.67 | 1.34 | 0.38 | 0.77 | 1.72 |
| 11JY1676 | C6 RIL 366                                                                                 | 328 | NP   | 1   | 46.67 | 34.30 | 4.76  | 2.87 | 0.40 | 0.18 | 0.73 | 0.58 |
| 11JY1677 | C6 RIL 368                                                                                 | 329 | NP   | 1   | 64.00 | 46.00 | 9.81  | 3.06 | 0.75 | 0.25 | 0.72 | 1.00 |
| 11JY1678 | C6 RIL 372                                                                                 | 330 | NP   | 1   | 64.00 | 54.33 | 28.27 | 7.39 | 2.02 | 0.52 | 0.85 | 2.54 |
| 11JY1680 | C6 RIL 379                                                                                 | 331 | NP   | 1   | 48.83 | 33.67 | 5.69  | 1.63 | 0.44 | 0.13 | 0.69 | 0.57 |
| 11JY1682 | C6 RIL 382                                                                                 | 332 | NP   | 1   | 71.33 | 39.67 | 20.12 | 6.46 | 1.21 | 0.43 | 0.56 | 1.64 |
| 11JY1683 | C6 RIL 388                                                                                 | 333 | NP   | 1   | 65.83 | 34.33 | 14.14 | 3.73 | 1.12 | 0.37 | 0.52 | 1.49 |
| 11JY1684 | C6 RIL 391                                                                                 | 334 | NP   | 1   | 47.50 | 39.00 | 8.65  | 3.21 | 0.65 | 0.22 | 0.82 | 0.87 |
| 11JY1686 | C6 RIL 394                                                                                 | 335 | NP   | 1   | 68.50 | 58.33 | 16.28 | 6.00 | 1.22 | 0.49 | 0.85 | 1.71 |
| 11JY1687 | C6 RIL 395                                                                                 | 336 | NP   | 1   | 65.67 | 38.00 | 16.31 | 5.11 | 1.06 | 0.32 | 0.58 | 1.38 |
| 11JY1688 | C6 RIL 398                                                                                 | 337 | NP   | 1   | 68.33 | 43.67 | 17.19 | 5.01 | 1.26 | 0.43 | 0.64 | 1.69 |
| 11JY1689 | C6 RIL 400                                                                                 | 338 | NP   | 1   | 69.50 | 44.00 | 11.73 | 5.06 | 0.86 | 0.43 | 0.63 | 1.29 |
| 11JY2045 | (CUBA/GUAD C1 F27-4-3-3-B-1-Bx[KILIMA ST94A]-30/MSV-03-2-10-B-2-B-B)-160-1-B-3-B           | 339 | NP   | 1   | 57.68 | 50.48 | 11.66 | 2.78 | 0.67 | 0.19 | 0.88 | 0.85 |
| 11JY2047 | [[MSRXPOOL9]C1F2-176-4-7-X-1-B/CML206]-5-2-3-1-BBBBB-B-B-B                                 | 340 | NP   | 1   | 70.02 | 61.15 | 20.77 | 4.52 | 1.34 | 0.34 | 0.87 | 1.68 |
| 11JY2051 | [CML199/[EV7992#/EV8449-SR]C1F2-334-1(OSU8i)-6-3-Sn]-B-23-2-2-B*4-B-B-B                    | 341 | NP   | 1   | 43.16 | 48.03 | 10.51 | 3.65 | 0.85 | 0.17 | 1.11 | 1.02 |
| 11JY2052 | [CML312/[TUXPSEQ]C1F2/P49-SR]F2-45-3-2-1-BB//INTA-F2-192-2-1-1-1-BBBB]-1-5-1-1-1-BBB-B-B-B | 342 | NP   | 1   | 61.85 | 36.15 | 13.92 | 3.19 | 0.84 | 0.21 | 0.58 | 1.06 |

| Seed ID  | Acc                                                                                                     | Gen | trt. | rep | SL    | RL    | SFW   | RFW  | SDW  | RDW  | RSR  | TDM  |
|----------|---------------------------------------------------------------------------------------------------------|-----|------|-----|-------|-------|-------|------|------|------|------|------|
| 11JY2053 | [CML312/CML445//[TUXPSEQ]C1F2/P49-SR]F2-45-3-2-1-BBB]-1-2-1-1-2-BBB-B-B-B                               | 343 | NP   | 1   | 48.79 | 35.97 | 6.97  | 2.36 | 0.48 | 0.08 | 0.74 | 0.57 |
| 11JY2054 | [CML312/MAS[MSR/312]-109-3]-B-71-3-BBB-B-B-B                                                            | 344 | NP   | 1   | 59.02 | 46.82 | 13.20 | 3.76 | 0.82 | 0.26 | 0.79 | 1.07 |
| 11JY2055 | [CML389/CML176]-B-29-2-2-B*5                                                                            | 345 | NP   | 1   | 55.02 | 55.15 | 15.45 | 4.15 | 0.88 | 0.25 | 1.00 | 1.12 |
| 11JY2056 | [CML395/CML440//[LPSC3H144-1-2-2-2-4-#-BB/SC/ZM605#b-19-2-X]-1-2-X-1-1-BB]-1-2-1-1-B]-3-2-1-1-BBB-B-B-B | 346 | NP   | 1   | 33.79 | 34.97 | 2.70  | 1.37 | 0.21 | 0.08 | 1.03 | 0.29 |
| 11JY2060 | [CML444/ZSR923S4BULK-2-2-X-X-X-1-BB]-1-1-1-2/CML441]-1-1-1-2-BBB-B-B-B                                  | 347 | NP   | 1   | 35.46 | 36.63 | 1.60  | 0.78 | 0.13 | 0.04 | 1.03 | 0.17 |
| 11JY2061 | [DRB-F2-180-2/DRB-3-4-1]-X-6-1-3-BB-2-BBBBBB-B-B-B                                                      | 348 | NP   | 1   | 45.79 | 38.63 | 9.05  | 2.57 | 0.74 | 0.17 | 0.84 | 0.91 |
| 11JY2063 | [DTPWC8F31-4-2-1-6-B2/CML395//[CML445/ZM621B]-2-1-2-3-1-BB]-3-2-1-1-1-2-B-B-B                           | 349 | NP   | 1   | 56.35 | 45.48 | 11.67 | 2.72 | 0.66 | 0.20 | 0.81 | 0.86 |
| 11JY2064 | [Ent320:92SEW2-77/[DMRESR-W]EarlySel-#I-2-4-B/CML386]-B-11-3-B-2-#-B*4                                  | 350 | NP   | 1   | 39.46 | 35.97 | 4.03  | 1.62 | 0.37 | 0.09 | 0.91 | 0.46 |
| 11JY2065 | [LZ956441/LZ966205]-B-3-4-4-B-5-BBBBB-B-B-B                                                             | 351 | NP   | 1   | 50.13 | 48.30 | 7.59  | 3.12 | 0.68 | 0.19 | 0.96 | 0.87 |
| 11JY2066 | [MSRXPOOL9]C1F2-205-1(OSU23i)-5-3-X-X-1-B//EV7992/EV8449...-3-2-2-1-BBBBB-B-B-B                         | 352 | NP   | 1   | 44.63 | 45.97 | 6.77  | 1.96 | 0.69 | 0.16 | 1.03 | 0.85 |
| 11JY2067 | [SYN-USAB2/SYN-ELIB2]-12-1-1-1-B*4-B-B-B                                                                | 353 | NP   | 1   | 51.46 | 60.30 | 9.45  | 4.02 | 0.69 | 0.19 | 1.17 | 0.87 |
| 11JY2070 | 02SADVE2B-#-42-1-1-1-1-B-B-B                                                                            | 354 | NP   | 1   | 43.13 | 53.97 | 4.03  | 1.55 | 0.26 | 0.09 | 1.25 | 0.35 |
| 11JY2071 | 02SADVL2B-#-16-2-1-B-B-B                                                                                | 355 | NP   | 1   | 39.13 | 43.63 | 3.02  | 1.42 | 0.21 | 0.03 | 1.12 | 0.24 |
| 11JY2075 | 20V-18                                                                                                  | 356 | NP   | 1   | 56.79 | 34.97 | 11.03 | 2.20 | 0.78 | 0.11 | 0.62 | 0.89 |
| 11JY2076 | 622016-ZCN-2                                                                                            | 357 | NP   | 1   | 58.79 | 41.63 | 10.45 | 3.10 | 0.76 | 0.19 | 0.71 | 0.95 |
| 11JY2078 | 761BB2 BCox751B-B-1-1-B-B-B-B-B                                                                         | 358 | NP   | 1   | 50.46 | 39.63 | 8.95  | 2.74 | 0.85 | 0.24 | 0.79 | 1.08 |
| 11JY2079 | BRAZ 2309                                                                                               | 359 | NP   | 1   | 50.79 | 46.97 | 4.15  | 1.52 | 0.36 | 0.09 | 0.92 | 0.45 |
| 11JY2081 | CL-04934 (P49C2H12-5-4xP23C2-11-1)-2-2-2-B*10                                                           | 360 | NP   | 1   | 53.02 | 42.48 | 14.38 | 3.86 | 0.87 | 0.24 | 0.80 | 1.10 |
| 11JY2083 | CML103                                                                                                  | 361 | NP   | 1   | 62.13 | 58.30 | 9.92  | 3.57 | 0.78 | 0.21 | 0.94 | 0.99 |
| 11JY2085 | CML114                                                                                                  | 362 | NP   | 1   | 44.79 | 38.30 | 5.37  | 1.97 | 0.34 | 0.09 | 0.86 | 0.43 |
| 11JY2086 | CML115                                                                                                  | 363 | NP   | 1   | 48.46 | 38.97 | 4.80  | 1.85 | 0.32 | 0.06 | 0.80 | 0.38 |
| 11JY2087 | CML116                                                                                                  | 364 | NP   | 1   | 48.13 | 37.63 | 5.07  | 1.41 | 0.36 | 0.08 | 0.78 | 0.44 |
| 11JY2088 | CML118                                                                                                  | 365 | NP   | 1   | 41.46 | 43.30 | 3.78  | 2.18 | 0.34 | 0.06 | 1.04 | 0.40 |
| 11JY2090 | CML127                                                                                                  | 366 | NP   | 1   | 41.79 | 44.30 | 5.05  | 2.11 | 0.44 | 0.07 | 1.06 | 0.51 |
| 11JY2091 | CML130                                                                                                  | 367 | NP   | 1   | 52.79 | 53.30 | 6.24  | 2.09 | 0.51 | 0.08 | 1.01 | 0.58 |
| 11JY2092 | CML133                                                                                                  | 368 | NP   | 1   | 50.79 | 44.97 | 8.45  | 3.41 | 0.68 | 0.24 | 0.89 | 0.91 |

| Seed ID  | Acc                                                             | Gen | trt. | rep | SL    | RL    | SFW   | RFW  | SDW  | RDW  | RSR  | TDM  |
|----------|-----------------------------------------------------------------|-----|------|-----|-------|-------|-------|------|------|------|------|------|
| 11JY2093 | CML134                                                          | 369 | NP   | 1   | 49.79 | 38.30 | 5.25  | 1.25 | 0.50 | 0.11 | 0.77 | 0.61 |
| 11JY2094 | CML135                                                          | 370 | NP   | 1   | 53.46 | 35.63 | 11.69 | 3.87 | 0.92 | 0.32 | 0.67 | 1.24 |
| 11JY2102 | CML169                                                          | 371 | NP   | 1   | 53.83 | 34.80 | 7.64  | 2.68 | 0.56 | 0.26 | 0.65 | 0.82 |
| 11JY2103 | CML170                                                          | 372 | NP   | 1   | 50.49 | 35.47 | 8.85  | 3.71 | 0.74 | 0.23 | 0.70 | 0.98 |
| 11JY2107 | CML192                                                          | 373 | NP   | 1   | 67.16 | 42.80 | 12.89 | 3.60 | 0.90 | 0.33 | 0.64 | 1.24 |
| 11JY2108 | CML20                                                           | 374 | NP   | 1   | 48.16 | 34.13 | 5.79  | 2.23 | 0.49 | 0.16 | 0.71 | 0.65 |
| 11JY2109 | CML202                                                          | 375 | NP   | 1   | 49.49 | 31.80 | 7.20  | 2.16 | 0.50 | 0.17 | 0.64 | 0.67 |
| 11JY2110 | CML206                                                          | 376 | NP   | 1   | 53.49 | 40.80 | 9.49  | 3.07 | 0.67 | 0.21 | 0.76 | 0.88 |
| 11JY2112 | CML226                                                          | 377 | NP   | 1   | 44.83 | 31.47 | 4.54  | 1.45 | 0.36 | 0.12 | 0.70 | 0.48 |
| 11JY2114 | CML229                                                          | 378 | NP   | 1   | 57.16 | 28.80 | 11.81 | 5.70 | 0.82 | 0.31 | 0.50 | 1.13 |
| 11JY2117 | CML283                                                          | 379 | NP   | 1   | 48.83 | 31.80 | 6.93  | 2.23 | 0.52 | 0.18 | 0.65 | 0.70 |
| 11JY2122 | CML290                                                          | 380 | NP   | 1   | 52.33 | 40.30 | 7.63  | 3.29 | 0.54 | 0.23 | 0.77 | 0.76 |
| 11JY2125 | CML304                                                          | 381 | NP   | 1   | 61.49 | 33.47 | 13.33 | 5.73 | 1.03 | 0.29 | 0.54 | 1.32 |
| 11JY2126 | CML31                                                           | 382 | NP   | 1   | 57.83 | 42.30 | 7.70  | 2.89 | 0.60 | 0.19 | 0.73 | 0.79 |
| 11JY2127 | CML311/MBR C3 BC F23-1-2-1-B-B-B                                | 383 | NP   | 1   | 53.83 | 33.80 | 7.61  | 2.64 | 0.49 | 0.15 | 0.63 | 0.64 |
| 11JY2128 | CML311/MBR C3 BC F3-1-1-1-B-B-B                                 | 384 | NP   | 1   | 66.83 | 49.47 | 15.11 | 5.84 | 1.07 | 0.41 | 0.74 | 1.48 |
| 11JY2129 | CML311/MBR C3 BC F3-1-1-2-B-B                                   | 385 | NP   | 1   | 53.33 | 41.30 | 6.73  | 2.53 | 0.51 | 0.17 | 0.77 | 0.68 |
| 11JY2132 | CML311/MBR C3 BC F43-2-1-1-B-B-B                                | 386 | NP   | 1   | 60.83 | 43.80 | 12.89 | 4.99 | 0.92 | 0.27 | 0.72 | 1.19 |
| 11JY2133 | CML311/MBR C3 BC F65-1-2-2-B-B-B                                | 387 | NP   | 1   | 45.16 | 33.80 | 6.09  | 2.41 | 0.50 | 0.14 | 0.75 | 0.64 |
| 11JY2134 | CML311/MBR C3 BC F95-2-2-1-B-B-B                                | 388 | NP   | 1   | 58.83 | 39.13 | 10.72 | 4.13 | 0.74 | 0.25 | 0.67 | 0.99 |
| 11JY2136 | CML312SR                                                        | 389 | NP   | 1   | 51.33 | 39.30 | 7.38  | 3.01 | 0.57 | 0.21 | 0.77 | 0.78 |
| 11JY2137 | CML312SRQ=[[(CLQ-RCWQ83xCML312SR)xCML312SR]xCML312SR)]-15-1-BBB | 390 | NP   | 1   | 49.16 | 29.80 | 6.40  | 2.88 | 0.49 | 0.19 | 0.61 | 0.68 |
| 11JY2140 | CML322                                                          | 391 | NP   | 1   | 42.49 | 31.47 | 6.53  | 3.91 | 0.48 | 0.22 | 0.74 | 0.70 |
| 11JY2141 | CML323                                                          | 392 | NP   | 1   | 52.83 | 47.47 | 8.05  | 2.98 | 0.71 | 0.22 | 0.90 | 0.93 |
| 11JY2142 | CML325                                                          | 393 | NP   | 1   | 61.83 | 48.47 | 9.13  | 4.51 | 0.76 | 0.27 | 0.78 | 1.02 |
| 11JY2144 | CML328                                                          | 394 | NP   | 1   | 49.16 | 35.13 | 8.08  | 2.09 | 0.64 | 0.19 | 0.71 | 0.84 |
| 11JY2146 | CML338                                                          | 395 | NP   | 1   | 54.49 | 47.97 | 11.43 | 2.12 | 0.93 | 0.18 | 0.88 | 1.11 |
| 11JY2147 | CML360                                                          | 396 | NP   | 1   | 45.49 | 36.97 | 8.01  | 2.26 | 0.62 | 0.14 | 0.81 | 0.76 |
| 11JY2148 | CML361                                                          | 397 | NP   | 1   | 60.83 | 42.63 | 13.43 | 3.65 | 0.88 | 0.23 | 0.70 | 1.10 |
| 11JY2149 | CML364                                                          | 398 | NP   | 1   | 50.74 | 41.98 | 9.49  | 3.04 | 0.57 | 0.18 | 0.83 | 0.75 |
| 11JY2150 | CML380xMBR/MDR C3 BC F21-1-1-2-B-B-B-B-3-1-B-B-B                | 399 | NP   | 1   | 48.41 | 47.32 | 7.00  | 2.50 | 0.50 | 0.14 | 0.98 | 0.64 |
| 11JY2151 | CML384xMBR/MDR C3 BC F58-2-1-3-B-B-B-B-3-1-B-B-B                | 400 | NP   | 1   | 62.41 | 32.98 | 12.68 | 2.51 | 0.98 | 0.20 | 0.53 | 1.17 |

| Seed ID  | Acc                                         | Gen | trt. | rep | SL    | RL    | SFW   | RFW  | SDW  | RDW  | RSR  | TDM  |
|----------|---------------------------------------------|-----|------|-----|-------|-------|-------|------|------|------|------|------|
| 11JY2152 | CML389                                      | 401 | NP   | 1   | 62.08 | 38.65 | 12.59 | 3.48 | 0.95 | 0.21 | 0.62 | 1.16 |
| 11JY2153 | CML389/CML144//CML159//POOL15QPMSR-B-6-B-B  | 402 | NP   | 1   | 49.24 | 39.98 | 6.29  | 2.33 | 0.36 | 0.16 | 0.81 | 0.52 |
| 11JY2154 | CML40                                       | 403 | NP   | 1   | 54.41 | 44.65 | 8.56  | 3.03 | 0.60 | 0.24 | 0.82 | 0.84 |
| 11JY2155 | CML402                                      | 404 | NP   | 1   | 57.41 | 45.65 | 11.05 | 3.18 | 0.97 | 0.31 | 0.80 | 1.28 |
| 11JY2157 | CML411                                      | 405 | NP   | 1   | 61.74 | 50.32 | 13.08 | 5.35 | 0.69 | 0.33 | 0.81 | 1.02 |
| 11JY2160 | CML423                                      | 406 | NP   | 1   | 57.08 | 38.65 | 16.34 | 4.16 | 1.39 | 0.38 | 0.68 | 1.77 |
| 11JY2162 | CML428                                      | 407 | NP   | 1   | 43.74 | 33.98 | 4.57  | 1.68 | 0.38 | 0.11 | 0.78 | 0.48 |
| 11JY2163 | CML430                                      | 408 | NP   | 1   | 45.24 | 36.48 | 6.41  | 1.70 | 0.46 | 0.14 | 0.81 | 0.60 |
| 11JY2164 | CML431                                      | 409 | NP   | 1   | 52.74 | 31.65 | 7.78  | 1.95 | 0.53 | 0.10 | 0.60 | 0.63 |
| 11JY2165 | CML432                                      | 410 | NP   | 1   | 51.08 | 24.65 | 10.10 | 1.69 | 0.78 | 0.16 | 0.48 | 0.94 |
| 11JY2166 | CML433                                      | 411 | NP   | 1   | 37.74 | 23.98 | 4.56  | 1.76 | 0.30 | 0.13 | 0.64 | 0.43 |
| 11JY2168 | CML445/CML144//CML159//POOL15QPMSR-B-55-B-B | 412 | NP   | 1   | 48.08 | 31.98 | 9.91  | 2.75 | 0.77 | 0.18 | 0.67 | 0.95 |
| 11JY2170 | CML454                                      | 413 | NP   | 1   | 49.24 | 34.48 | 7.59  | 3.39 | 0.81 | 0.27 | 0.70 | 1.07 |
| 11JY2172 | CML468                                      | 414 | NP   | 1   | 71.74 | 35.98 | 13.21 | 4.40 | 1.16 | 0.32 | 0.50 | 1.48 |
| 11JY2173 | CML470                                      | 415 | NP   | 1   | 57.41 | 34.65 | 10.76 | 4.24 | 0.80 | 0.29 | 0.60 | 1.08 |
| 11JY2176 | CML479                                      | 416 | NP   | 1   | 41.41 | 45.65 | 5.60  | 1.94 | 0.45 | 0.18 | 1.10 | 0.63 |
| 11JY2177 | CML480                                      | 417 | NP   | 1   | 53.08 | 28.65 | 9.78  | 3.21 | 0.75 | 0.26 | 0.54 | 1.01 |
| 11JY2180 | CML496                                      | 418 | NP   | 1   | 52.74 | 47.98 | 5.58  | 1.80 | 0.52 | 0.14 | 0.91 | 0.66 |
| 11JY2189 | CML80                                       | 419 | NP   | 1   | 66.08 | 45.32 | 14.00 | 3.82 | 1.16 | 0.29 | 0.69 | 1.45 |
| 11JY2192 | CML94                                       | 420 | NP   | 1   | 62.08 | 37.65 | 13.50 | 3.69 | 1.21 | 0.37 | 0.61 | 1.58 |
| 11JY2193 | CML96                                       | 421 | NP   | 1   | 39.74 | 29.32 | 2.93  | 0.28 | 0.27 | 0.09 | 0.74 | 0.36 |
| 11JY2194 | CML99                                       | 422 | NP   | 1   | 42.74 | 32.32 | 3.53  | 1.29 | 0.28 | 0.12 | 0.76 | 0.40 |
| 11JY2196 | Cuba/GuadC3F125-2-2-1-B-B-B                 | 423 | NP   | 1   | 49.58 | 44.88 | 11.89 | 2.58 | 0.69 | 0.26 | 0.91 | 0.95 |
| 11JY2197 | CY9169                                      | 424 | NP   | 1   | 51.22 | 29.06 | 11.44 | 2.27 | 0.73 | 0.16 | 0.57 | 0.89 |
| 11JY2198 | DTPW C9                                     | 425 | NP   | 1   | 55.05 | 34.06 | 10.69 | 3.52 | 0.83 | 0.24 | 0.62 | 1.07 |
| 11JY2199 | DTPWC9-F104-5-4-1-1-B-B-B                   | 426 | NP   | 1   | 70.88 | 51.06 | 17.01 | 2.97 | 0.95 | 0.33 | 0.72 | 1.28 |
| 11JY2200 | DTPY C9                                     | 427 | NP   | 1   | 41.55 | 37.06 | 7.99  | 3.10 | 0.59 | 0.19 | 0.89 | 0.78 |
| 11JY2201 | DTPYC9-F46-1-2-1-2-B-B                      | 428 | NP   | 1   | 66.22 | 58.73 | 11.60 | 3.34 | 0.76 | 0.18 | 0.89 | 0.94 |
| 11JY2202 | DTPYC9-F46-3-9-1-1-B-BTL-07B 6614-42        | 429 | NP   | 1   | 42.55 | 34.06 | 7.30  | 2.07 | 0.45 | 0.12 | 0.80 | 0.57 |
| 11JY2204 | Guad 6                                      | 430 | NP   | 1   | 55.55 | 51.73 | 12.36 | 4.95 | 0.77 | 0.30 | 0.93 | 1.07 |
| 11JY2205 | H-16                                        | 431 | NP   | 1   | 64.22 | 52.06 | 12.69 | 4.43 | 0.92 | 0.29 | 0.81 | 1.21 |
| 11JY2207 | La Posta Seq C7-F125-2-1-1-2-B-B-B          | 432 | NP   | 1   | 50.55 | 39.73 | 10.64 | 4.26 | 0.71 | 0.25 | 0.79 | 0.97 |
| 11JY2211 | La Posta Seq C7-F64-2-6-1-2-B-B-B           | 433 | NP   | 1   | 53.55 | 45.06 | 11.97 | 4.14 | 0.99 | 0.29 | 0.84 | 1.28 |
| 11JY2216 | La Posta Seq C7-F96-1-2-1-2-B-B             | 434 | NP   | 1   | 46.22 | 46.06 | 9.60  | 3.41 | 0.66 | 0.23 | 1.00 | 0.89 |

| Seed ID  | Acc                                | Gen | trt. | rep | SL    | RL    | SFW   | RFW  | SDW  | RDW  | RSR  | TDM  |
|----------|------------------------------------|-----|------|-----|-------|-------|-------|------|------|------|------|------|
| 11JY2218 | LPSC7                              | 435 | NP   | 1   | 62.55 | 58.06 | 11.05 | 3.40 | 0.72 | 0.18 | 0.93 | 0.90 |
| 11JY2220 | MAS[206/312]-23-2-1-1-B*6-B-B-B    | 436 | NP   | 1   | 51.22 | 31.39 | 9.99  | 2.36 | 0.63 | 0.16 | 0.61 | 0.80 |
| 11JY2223 | MBR C6 BC F234-1-B-#-1-1-B-B-B-B-B | 437 | NP   | 1   | 52.55 | 38.06 | 9.83  | 3.12 | 0.64 | 0.19 | 0.72 | 0.84 |
| 11JY2225 | P402c2F2-695-2-BB-2-B*4-1-B        | 438 | NP   | 1   | 48.22 | 40.73 | 8.10  | 2.48 | 0.50 | 0.15 | 0.84 | 0.66 |
| 11JY2228 | P591c4 F55-2-2-2-B-B-B             | 439 | NP   | 1   | 50.55 | 37.73 | 8.86  | 2.68 | 0.57 | 0.17 | 0.75 | 0.74 |
| 11JY2229 | P591c41y2GENF3-1-1-2-B-B-B         | 440 | NP   | 1   | 46.55 | 44.06 | 7.90  | 2.11 | 0.49 | 0.13 | 0.95 | 0.62 |
| 11JY2230 | PAZM 6053                          | 441 | NP   | 1   | 38.55 | 35.06 | 7.32  | 2.09 | 0.54 | 0.16 | 0.91 | 0.70 |
| 11JY2231 | Pool 21 x Pool 22                  | 442 | NP   | 1   | 53.05 | 26.56 | 7.77  | 2.38 | 0.51 | 0.15 | 0.50 | 0.65 |
| 11JY2233 | R15                                | 443 | NP   | 1   | 62.55 | 42.06 | 10.98 | 2.71 | 0.71 | 0.19 | 0.67 | 0.90 |
| 11JY2234 | RD0M 330                           | 444 | NP   | 1   | 44.05 | 29.06 | 7.09  | 2.17 | 0.47 | 0.13 | 0.66 | 0.60 |
| 11JY2238 | VL0512452                          | 445 | NP   | 1   | 52.22 | 32.06 | 10.60 | 2.86 | 0.83 | 0.22 | 0.61 | 1.05 |
| 11JY2239 | VL0512464                          | 446 | NP   | 1   | 59.55 | 37.73 | 13.20 | 3.18 | 0.91 | 0.24 | 0.63 | 1.15 |
| 11JY2240 | VL05128                            | 447 | NP   | 1   | 53.02 | 42.18 | 11.61 | 2.91 | 0.69 | 0.21 | 0.80 | 0.90 |
| 11JY2241 | VL052                              | 448 | NP   | 1   | 57.35 | 34.18 | 13.13 | 2.90 | 0.84 | 0.21 | 0.60 | 1.05 |
| 11JY2243 | VL05353                            | 449 | NP   | 1   | 60.35 | 39.85 | 16.27 | 5.39 | 1.09 | 0.40 | 0.66 | 1.50 |
| 11JY2244 | VL054178                           | 450 | NP   | 1   | 47.35 | 40.18 | 9.80  | 2.28 | 0.53 | 0.15 | 0.85 | 0.68 |
| 11JY2246 | VL054881                           | 451 | NP   | 1   | 53.02 | 38.85 | 10.69 | 2.67 | 0.67 | 0.16 | 0.73 | 0.83 |
| 11JY2248 | VL0556                             | 452 | NP   | 1   | 49.35 | 47.18 | 11.72 | 3.15 | 0.73 | 0.26 | 0.96 | 0.99 |
| 11JY2249 | VL05561                            | 453 | NP   | 1   | 41.68 | 37.18 | 8.88  | 2.32 | 0.46 | 0.17 | 0.89 | 0.63 |
| 11JY2250 | VL0558                             | 454 | NP   | 1   | 50.68 | 45.52 | 11.94 | 2.70 | 0.61 | 0.19 | 0.90 | 0.80 |
| 11JY2252 | VL05616                            | 455 | NP   | 1   | 55.83 | 39.13 | 11.13 | 2.82 | 0.63 | 0.20 | 0.70 | 0.83 |
| 11JY2255 | VL056942                           | 456 | NP   | 1   | 59.83 | 57.80 | 13.84 | 3.18 | 0.82 | 0.25 | 0.97 | 1.08 |
| 11JY2259 | VL062784                           | 457 | NP   | 1   | 51.83 | 36.80 | 10.10 | 2.27 | 0.52 | 0.17 | 0.71 | 0.69 |
| 11JY2260 | VL062785                           | 458 | NP   | 1   | 63.16 | 42.80 | 13.07 | 2.88 | 0.76 | 0.21 | 0.68 | 0.97 |
| 11JY2262 | VL06384                            | 459 | NP   | 1   | 49.99 | 32.97 | 10.24 | 2.73 | 0.74 | 0.12 | 0.66 | 0.85 |
| 11JY2263 | ZM521B-66-4-1-1-BB-B-B-B           | 460 | NP   | 1   | 55.74 | 45.38 | 11.95 | 2.81 | 0.61 | 0.24 | 0.81 | 0.85 |
| 11JY2264 | 川29♀                               | 461 | NP   | 1   | 56.24 | 44.55 | 12.32 | 2.56 | 0.66 | 0.20 | 0.79 | 0.86 |
| 11JY2265 | 慈溪白糯                               | 462 | NP   | 1   | 49.74 | 46.88 | 10.83 | 2.53 | 0.50 | 0.17 | 0.94 | 0.68 |
| 11JY2266 | 独紫                                 | 463 | NP   | 1   | 63.58 | 54.55 | 14.39 | 3.46 | 0.76 | 0.26 | 0.86 | 1.02 |
| 11JY2268 | 交51                                | 464 | NP   | 1   | 58.58 | 43.22 | 13.02 | 2.77 | 0.69 | 0.23 | 0.74 | 0.92 |
| 11JY2269 | 双M9                                | 465 | NP   | 1   | 52.24 | 41.88 | 10.99 | 2.48 | 0.56 | 0.21 | 0.80 | 0.76 |
| 11JY2270 | 四川地方种质                             | 466 | NP   | 1   | 59.91 | 46.22 | 13.51 | 3.26 | 0.74 | 0.26 | 0.77 | 1.00 |
| 11JY2271 | 豫综BC15-2                           | 467 | NP   | 1   | 54.24 | 41.22 | 11.25 | 2.57 | 0.58 | 0.22 | 0.76 | 0.80 |
| 11JY2279 | 407                                | 468 | NP   | 1   | 49.74 | 38.38 | 10.84 | 2.30 | 0.51 | 0.19 | 0.77 | 0.71 |
| 11JY2280 | 412                                | 469 | NP   | 1   | 39.99 | 32.97 | 6.26  | 1.84 | 0.44 | 0.10 | 0.82 | 0.54 |
| 11JY2288 | 485                                | 470 | NP   | 1   | 56.49 | 44.97 | 15.42 | 6.04 | 1.10 | 0.32 | 0.80 | 1.41 |

| Seed ID  | Acc                                                                      | Gen | trt. | rep | SL    | RL    | SFW   | RFW  | SDW  | RDW  | RSR  | TDM  |
|----------|--------------------------------------------------------------------------|-----|------|-----|-------|-------|-------|------|------|------|------|------|
| 11JY2290 | 495                                                                      | 471 | NP   | 1   | 52.99 | 36.97 | 9.12  | 2.86 | 0.66 | 0.16 | 0.70 | 0.81 |
| 11JY2311 | 8001                                                                     | 472 | NP   | 1   | 58.49 | 42.13 | 13.17 | 3.05 | 0.75 | 0.20 | 0.72 | 0.95 |
| 11JY2317 | [(CML395/CML444)-B-4-1-3-1-B/CML395//DTPWC8F31-1-1-2-2]-5-1-2-2-BB-B-B-B | 473 | NP   | 1   | 41.99 | 48.97 | 6.58  | 2.14 | 0.47 | 0.08 | 1.17 | 0.54 |
| 11JY2327 | 4F1                                                                      | 474 | NP   | 1   | 52.83 | 43.63 | 11.22 | 3.98 | 0.73 | 0.19 | 0.83 | 0.92 |
| 11JY2356 | B73                                                                      | 475 | NP   | 1   | 78.88 | 51.30 | 13.20 | 3.41 | 0.79 | 0.24 | 0.65 | 1.03 |
| 11JY2391 | E28                                                                      | 476 | NP   | 1   | 54.46 | 38.97 | 9.22  | 1.85 | 0.67 | 0.12 | 0.72 | 0.80 |
| 11JY2394 | ES40                                                                     | 477 | NP   | 1   | 47.49 | 42.47 | 9.32  | 2.40 | 0.68 | 0.11 | 0.89 | 0.79 |
| 11JY2396 | F42                                                                      | 478 | NP   | 1   | 60.46 | 39.63 | 17.46 | 4.59 | 1.24 | 0.30 | 0.66 | 1.54 |
| 11JY2398 | FR19                                                                     | 479 | NP   | 1   | 46.13 | 45.97 | 5.92  | 2.22 | 0.38 | 0.06 | 1.00 | 0.45 |
| 11JY2426 | MBNA                                                                     | 480 | NP   | 1   | 55.35 | 39.18 | 11.97 | 3.45 | 0.67 | 0.22 | 0.71 | 0.89 |
| 11JY2434 | NS701                                                                    | 481 | NP   | 1   | 62.02 | 42.85 | 11.78 | 2.73 | 0.61 | 0.17 | 0.69 | 0.78 |
| 11JY2445 | PHG83                                                                    | 482 | NP   | 1   | 53.68 | 42.52 | 11.29 | 2.80 | 0.63 | 0.17 | 0.79 | 0.80 |
| 11JY2446 | PHN47                                                                    | 483 | NP   | 1   | 53.85 | 39.85 | 13.44 | 3.33 | 0.80 | 0.23 | 0.74 | 1.03 |
| 11JY2453 | R09                                                                      | 484 | NP   | 1   | 51.49 | 34.97 | 11.20 | 3.28 | 0.94 | 0.23 | 0.68 | 1.16 |
| 11JY2467 | Va35                                                                     | 485 | NP   | 1   | 54.83 | 43.80 | 12.29 | 3.18 | 0.62 | 0.22 | 0.80 | 0.84 |
| 11JY2470 | W8304                                                                    | 486 | NP   | 1   | 63.16 | 38.80 | 12.71 | 2.65 | 0.75 | 0.22 | 0.61 | 0.97 |
| 11JY2474 | XZY364-1                                                                 | 487 | NP   | 1   | 70.05 | 43.47 | 2.52  | 2.64 | 0.33 | 0.12 | 0.62 | 0.46 |
| 11JY2491 | 长3154                                                                    | 488 | NP   | 1   | 51.83 | 53.80 | 10.83 | 2.88 | 0.60 | 0.22 | 1.04 | 0.82 |
| 11JY2498 | 丹3130                                                                    | 489 | NP   | 1   | 50.83 | 40.13 | 9.36  | 2.55 | 0.50 | 0.21 | 0.79 | 0.71 |
| 11JY2500 | 丹340                                                                     | 490 | NP   | 1   | 71.88 | 45.13 | 5.58  | 2.31 | 0.40 | 0.13 | 0.63 | 0.53 |
| 11JY2504 | 丹360                                                                     | 491 | NP   | 1   | 60.83 | 45.80 | 11.99 | 2.74 | 0.70 | 0.20 | 0.75 | 0.91 |
| 11JY2522 | 辐746                                                                     | 492 | NP   | 1   | 66.49 | 43.13 | 12.88 | 2.97 | 0.77 | 0.21 | 0.65 | 0.98 |
| 11JY2526 | 旱21                                                                      | 493 | NP   | 1   | 65.83 | 48.47 | 14.21 | 3.38 | 0.85 | 0.27 | 0.74 | 1.12 |
| 11JY2547 | 吉419                                                                     | 494 | NP   | 1   | 76.83 | 63.13 | 19.77 | 4.73 | 1.30 | 0.40 | 0.82 | 1.69 |
| 11JY2557 | 吉846                                                                     | 495 | NP   | 1   | 58.68 | 45.85 | 14.07 | 3.89 | 0.87 | 0.25 | 0.78 | 1.12 |
| 11JY2563 | 冀研01-3-2-2-1-5-1                                                         | 496 | NP   | 1   | 51.35 | 43.85 | 11.15 | 2.70 | 0.55 | 0.14 | 0.85 | 0.69 |
| 11JY2570 | 金黄96C                                                                    | 497 | NP   | 1   | 62.68 | 54.52 | 15.31 | 3.51 | 0.83 | 0.21 | 0.87 | 1.04 |
| 11JY2574 | 辽138                                                                     | 498 | NP   | 1   | 53.68 | 43.18 | 13.15 | 3.70 | 0.67 | 0.19 | 0.80 | 0.86 |
| 11JY2587 | 辽孤001                                                                    | 499 | NP   | 1   | 58.91 | 45.55 | 15.05 | 2.96 | 0.96 | 0.28 | 0.77 | 1.24 |
| 11JY2603 | 齐205                                                                     | 500 | NP   | 1   | 59.24 | 40.55 | 12.29 | 2.68 | 0.75 | 0.23 | 0.68 | 0.98 |
| 11JY2606 | 齐310                                                                     | 501 | NP   | 1   | 48.91 | 40.55 | 10.84 | 2.41 | 0.51 | 0.19 | 0.83 | 0.71 |
| 11JY2621 | 双105                                                                     | 502 | NP   | 1   | 54.91 | 38.88 | 11.45 | 2.50 | 0.61 | 0.19 | 0.71 | 0.80 |
| 11JY2623 | 双741                                                                     | 503 | NP   | 1   | 56.24 | 45.88 | 12.74 | 3.03 | 0.71 | 0.20 | 0.82 | 0.91 |

| Seed ID  | Acc                                                                             | Gen | trt. | rep | SL    | RL    | SFW   | RFW  | SDW  | RDW  | RSR  | TDM  |
|----------|---------------------------------------------------------------------------------|-----|------|-----|-------|-------|-------|------|------|------|------|------|
| 11JY2667 | 郑22                                                                             | 504 | NP   | 1   | 59.02 | 50.18 | 16.53 | 4.72 | 0.86 | 0.24 | 0.85 | 1.11 |
| 11JY2672 | 郑29                                                                             | 505 | NP   | 1   | 53.68 | 44.18 | 16.21 | 3.46 | 0.90 | 0.25 | 0.82 | 1.15 |
| 11JY2675 | 郑30                                                                             | 506 | NP   | 1   | 60.02 | 41.18 | 16.96 | 3.46 | 0.98 | 0.23 | 0.69 | 1.21 |
| 11JY2677 | 郑35                                                                             | 507 | NP   | 1   | 57.02 | 50.85 | 15.02 | 2.85 | 0.91 | 0.20 | 0.89 | 1.11 |
| 11JY2697 | 综31                                                                             | 508 | NP   | 1   | 66.35 | 34.52 | 14.98 | 2.70 | 0.84 | 0.15 | 0.52 | 0.99 |
| 12JY0001 | C5 RIL P2                                                                       | 509 | NP   | 1   | 77.22 | 39.30 | 11.39 | 4.61 | 0.88 | 0.31 | 0.51 | 1.19 |
| 12JY0002 | C5 RIL P1                                                                       | 510 | NP   | 1   | 74.55 | 34.63 | 6.08  | 2.28 | 0.29 | 0.15 | 0.46 | 0.45 |
| 12JY0015 | [(SML*SMQPM)*(MTL*SMQPM)]F1S6-1-25-BB-1-B                                       | 511 | NP   | 1   | 93.22 | 33.97 | 13.06 | 3.87 | 0.63 | 0.22 | 0.36 | 0.85 |
| 12JY0017 | [CML159/[CML159/[MSRXPOOL9]C1F2-205-1(OSU23i)-5-3-X-X-1-BB]F2-3sx]-8-1-1-BB-1-B | 512 | NP   | 1   | 82.22 | 54.63 | 11.60 | 4.64 | 0.65 | 0.29 | 0.66 | 0.94 |
| 12JY0018 | [CML198/LPSC3H144-1-2-2-2-2-#-BB]-1-4-1-1-4-B*4-B-B-B                           | 513 | NP   | 1   | 80.22 | 57.30 | 14.00 | 5.23 | 0.83 | 0.36 | 0.71 | 1.20 |
| 12JY0029 | [DTPWC8F31-4-2-1-6/CML444//ZM521B-66-4-1-1-1-BB]-3-2-1-B-B-B                    | 514 | NP   | 1   | 70.55 | 51.63 | 6.53  | 2.37 | 0.50 | 0.14 | 0.73 | 0.64 |
| 12JY0040 | 18-599                                                                          | 515 | NP   | 1   | 92.55 | 27.63 | 8.36  | 1.10 | 0.80 | 0.15 | 0.30 | 0.96 |
| 12JY0041 | 18-599(RED)                                                                     | 516 | NP   | 1   | 67.34 | 36.80 | 7.93  | 1.34 | 0.59 | 0.08 | 0.55 | 0.68 |
| 12JY0108 | CML330                                                                          | 517 | NP   | 1   | 68.55 | 55.30 | 7.49  | 2.61 | 0.55 | 0.17 | 0.81 | 0.71 |
| 12JY0122 | CML418                                                                          | 518 | NP   | 1   | 74.55 | 37.97 | 6.40  | 1.20 | 0.73 | 0.11 | 0.51 | 0.84 |
| 12JY0146 | CML504                                                                          | 519 | NP   | 1   | 73.88 | 52.30 | 6.77  | 1.59 | 0.67 | 0.14 | 0.71 | 0.82 |
| 12JY0156 | Cuba/Guad C3 F53-3-1-1-B-B-B                                                    | 520 | NP   | 1   | 80.88 | 53.30 | 8.24  | 2.59 | 0.48 | 0.13 | 0.66 | 0.62 |
| 12JY0164 | ECA-MOROSR( BC1)F2-7-ECAVEE7/PL15QPMC7SRC1F2//POOL15QPMSR-B-4-B-B               | 521 | NP   | 1   | 79.55 | 33.63 | 9.91  | 3.32 | 0.60 | 0.19 | 0.42 | 0.79 |
| 12JY0167 | INTA-191-2-1-2-B*8-B-B-B                                                        | 522 | NP   | 1   | 71.55 | 32.97 | 4.72  | 1.34 | 0.38 | 0.11 | 0.46 | 0.49 |
| 12JY0173 | La Posta Seq C7-F86-1-1-1-1-B-B-B                                               | 523 | NP   | 1   | 66.05 | 40.63 | 4.55  | 2.25 | 0.39 | 0.13 | 0.62 | 0.53 |
| 12JY0185 | P501SRc0-F2-47-3-1-1-B-B-B-B                                                    | 524 | NP   | 1   | 63.55 | 38.63 | 2.50  | 1.20 | 0.37 | 0.09 | 0.61 | 0.46 |
| 12JY0208 | VL05610                                                                         | 525 | NP   | 1   | 77.05 | 20.63 | 3.10  | 1.21 | 0.36 | 0.09 | 0.27 | 0.45 |
| 12JY0226 | 178                                                                             | 526 | NP   | 1   | 60.55 | 18.30 | 2.48  | 1.15 | 0.29 | 0.07 | 0.30 | 0.36 |
| 12JY0228 | 273                                                                             | 527 | NP   | 1   | 66.23 | 42.76 | 8.91  | 2.03 | 0.56 | 0.15 | 0.65 | 0.71 |
| 12JY0229 | 288                                                                             | 528 | NP   | 1   | 76.88 | 33.63 | 6.54  | 1.74 | 0.39 | 0.08 | 0.44 | 0.47 |
| 12JY0240 | 764                                                                             | 529 | NP   | 1   | 64.36 | 56.80 | 11.18 | 3.12 | 0.85 | 0.20 | 0.88 | 1.05 |
| 12JY0246 | 6103                                                                            | 530 | NP   | 1   | 84.22 | 60.63 | 12.95 | 3.99 | 0.91 | 0.21 | 0.72 | 1.12 |
| 12JY0252 | 81565                                                                           | 531 | NP   | 1   | 67.02 | 38.63 | 8.08  | 2.31 | 0.56 | 0.12 | 0.58 | 0.68 |
| 12JY0264 | 634-11511                                                                       | 532 | NP   | 1   | 69.36 | 47.30 | 10.03 | 1.91 | 0.82 | 0.15 | 0.68 | 0.97 |



| Seed ID  | Acc       | Gen | trt. | rep | SL    | RL    | SFW   | RFW  | SDW  | RDW  | RSR  | TDM  |
|----------|-----------|-----|------|-----|-------|-------|-------|------|------|------|------|------|
| 12JY0265 | 698-1     | 533 | NP   | 1   | 70.22 | 39.63 | 9.11  | 1.73 | 0.65 | 0.10 | 0.56 | 0.75 |
| 12JY0308 | FAPW      | 534 | NP   | 1   | 91.55 | 43.80 | 16.09 | 3.03 | 1.05 | 0.24 | 0.48 | 1.28 |
| 12JY0322 | LH132     | 535 | NP   | 1   | 81.22 | 53.13 | 14.13 | 2.72 | 0.73 | 0.22 | 0.65 | 0.95 |
| 12JY0323 | LH51      | 536 | NP   | 1   | 77.55 | 32.80 | 11.74 | 3.27 | 0.65 | 0.26 | 0.42 | 0.90 |
| 12JY0325 | LX9801    | 537 | NP   | 1   | 76.88 | 39.13 | 8.10  | 1.84 | 0.50 | 0.16 | 0.51 | 0.65 |
| 12JY0329 | Mo17      | 538 | NP   | 1   | 78.55 | 25.13 | 13.01 | 2.64 | 0.51 | 0.17 | 0.32 | 0.68 |
| 12JY0347 | R08       | 539 | NP   | 1   | 78.88 | 40.80 | 6.68  | 2.07 | 0.42 | 0.14 | 0.52 | 0.56 |
| 12JY0349 | RP125     | 540 | NP   | 1   | 59.69 | 45.47 | 11.33 | 2.88 | 0.77 | 0.16 | 0.76 | 0.93 |
| 12JY0365 | Zhao835   | 541 | NP   | 1   | 81.55 | 29.80 | 14.95 | 3.45 | 0.63 | 0.22 | 0.37 | 0.84 |
| 12JY0370 | 昌7-2      | 542 | NP   | 1   | 76.38 | 44.63 | 10.31 | 2.37 | 0.56 | 0.17 | 0.58 | 0.73 |
| 12JY0383 | 丹598      | 543 | NP   | 1   | 81.88 | 34.47 | 11.69 | 2.87 | 0.78 | 0.22 | 0.42 | 1.00 |
| 12JY0401 | 黄早四       | 544 | NP   | 1   | 73.88 | 40.97 | 10.72 | 2.63 | 0.69 | 0.17 | 0.55 | 0.87 |
| 12JY0416 | 吉853      | 545 | NP   | 1   | 82.88 | 36.80 | 14.11 | 3.37 | 0.64 | 0.20 | 0.44 | 0.83 |
| 12JY0443 | 南21-3     | 546 | NP   | 1   | 89.88 | 53.47 | 16.03 | 4.34 | 1.09 | 0.32 | 0.59 | 1.41 |
| 12JY0450 | 齐319      | 547 | NP   | 1   | 72.23 | 44.34 | 11.47 | 3.07 | 0.69 | 0.23 | 0.61 | 0.92 |
| 12JY0457 | 沈5003     | 548 | NP   | 1   | 84.55 | 54.63 | 16.81 | 4.40 | 1.05 | 0.36 | 0.65 | 1.40 |
| 12JY0462 | 四287      | 549 | NP   | 1   | 88.30 | 53.80 | 20.50 | 5.63 | 1.33 | 0.32 | 0.61 | 1.65 |
| 12JY0473 | 铁7922     | 550 | NP   | 1   | 83.55 | 32.80 | 17.81 | 4.77 | 0.96 | 0.28 | 0.39 | 1.24 |
| 11JY1255 | C5 RIL 2  | 1   | NP   | 2   | 49.99 | 37.80 | 9.46  | 4.01 | 0.62 | 0.23 | 0.76 | 0.85 |
| 11JY1256 | C5 RIL 3  | 2   | NP   | 2   | 47.33 | 36.80 | 7.06  | 2.24 | 0.55 | 0.14 | 0.78 | 0.68 |
| 11JY1258 | C5 RIL 5  | 3   | NP   | 2   | 57.66 | 41.13 | 14.62 | 4.54 | 1.16 | 0.28 | 0.71 | 1.44 |
| 11JY1259 | C5 RIL 6  | 4   | NP   | 2   | 53.99 | 29.13 | 9.00  | 2.83 | 0.52 | 0.15 | 0.54 | 0.67 |
| 11JY1262 | C5 RIL 10 | 5   | NP   | 2   | 49.49 | 35.13 | 8.76  | 4.04 | 0.64 | 0.26 | 0.71 | 0.90 |
| 11JY1263 | C5 RIL 11 | 6   | NP   | 2   | 55.66 | 33.47 | 14.05 | 4.18 | 1.09 | 0.26 | 0.60 | 1.35 |
| 11JY1264 | C5 RIL 12 | 7   | NP   | 2   | 43.33 | 43.80 | 5.16  | 2.05 | 0.38 | 0.14 | 1.01 | 0.52 |
| 11JY1267 | C5 RIL 17 | 8   | NP   | 2   | 52.33 | 40.80 | 11.23 | 4.54 | 0.72 | 0.22 | 0.78 | 0.94 |
| 11JY1268 | C5 RIL 18 | 9   | NP   | 2   | 49.99 | 37.13 | 10.30 | 3.42 | 0.84 | 0.21 | 0.74 | 1.04 |
| 11JY1269 | C5 RIL 19 | 10  | NP   | 2   | 51.49 | 34.63 | 12.20 | 4.87 | 0.87 | 0.27 | 0.67 | 1.13 |
| 11JY1271 | C5 RIL 21 | 11  | NP   | 2   | 48.99 | 36.47 | 8.78  | 3.61 | 0.61 | 0.22 | 0.74 | 0.82 |
| 11JY1272 | C5 RIL 24 | 12  | NP   | 2   | 44.66 | 33.80 | 6.83  | 3.22 | 0.46 | 0.19 | 0.76 | 0.65 |
| 11JY1274 | C5 RIL 26 | 13  | NP   | 2   | 54.33 | 30.80 | 11.70 | 2.91 | 0.69 | 0.14 | 0.57 | 0.83 |
| 11JY1275 | C5 RIL 27 | 14  | NP   | 2   | 41.49 | 42.63 | 8.22  | 3.27 | 0.57 | 0.15 | 1.03 | 0.72 |
| 11JY1276 | C5 RIL 28 | 15  | NP   | 2   | 44.66 | 24.13 | 5.84  | 1.68 | 0.38 | 0.10 | 0.54 | 0.48 |
| 11JY1278 | C5 RIL 30 | 16  | NP   | 2   | 40.99 | 34.47 | 5.78  | 2.49 | 0.39 | 0.14 | 0.84 | 0.53 |
| 11JY1279 | C5 RIL 31 | 17  | NP   | 2   | 39.66 | 31.13 | 8.44  | 2.63 | 0.64 | 0.16 | 0.78 | 0.80 |
| 11JY1280 | C5 RIL 32 | 18  | NP   | 2   | 61.66 | 34.13 | 18.07 | 5.94 | 1.38 | 0.41 | 0.55 | 1.79 |

| Seed ID  | Acc        | Gen | trt. | rep | SL    | RL    | SFW   | RFW  | SDW  | RDW  | RSR  | TDM  |
|----------|------------|-----|------|-----|-------|-------|-------|------|------|------|------|------|
| 11JY1281 | C5 RIL 34  | 19  | NP   | 2   | 49.33 | 31.13 | 9.34  | 3.61 | 0.63 | 0.20 | 0.63 | 0.83 |
| 11JY1282 | C5 RIL 36  | 20  | NP   | 2   | 53.33 | 28.13 | 10.65 | 4.49 | 0.53 | 0.23 | 0.53 | 0.75 |
| 11JY1283 | C5 RIL 38  | 21  | NP   | 2   | 37.33 | 31.47 | 4.39  | 2.80 | 0.35 | 0.13 | 0.84 | 0.48 |
| 11JY1284 | C5 RIL 39  | 22  | NP   | 2   | 43.33 | 31.80 | 5.00  | 1.96 | 0.46 | 0.16 | 0.73 | 0.62 |
| 11JY1285 | C5 RIL 40  | 23  | NP   | 2   | 55.99 | 38.80 | 9.44  | 4.09 | 0.71 | 0.29 | 0.69 | 1.00 |
| 11JY1286 | C5 RIL 41  | 24  | NP   | 2   | 47.66 | 31.80 | 7.58  | 3.12 | 0.59 | 0.18 | 0.67 | 0.77 |
| 11JY1287 | C5 RIL 42  | 25  | NP   | 2   | 51.33 | 33.13 | 8.77  | 3.24 | 0.66 | 0.18 | 0.65 | 0.84 |
| 11JY1288 | C5 RIL 44  | 26  | NP   | 2   | 48.33 | 34.63 | 5.15  | 2.92 | 0.41 | 0.12 | 0.72 | 0.53 |
| 11JY1289 | C5 RIL 45  | 27  | NP   | 2   | 54.33 | 36.80 | 11.72 | 3.72 | 0.92 | 0.30 | 0.68 | 1.22 |
| 11JY1290 | C5 RIL 46  | 28  | NP   | 2   | 38.99 | 33.13 | 5.81  | 3.35 | 0.36 | 0.15 | 0.85 | 0.51 |
| 11JY1292 | C5 RIL 48  | 29  | NP   | 2   | 52.33 | 34.13 | 9.27  | 2.48 | 0.65 | 0.18 | 0.65 | 0.83 |
| 11JY1293 | C5 RIL 49  | 30  | NP   | 2   | 58.66 | 33.80 | 10.12 | 3.84 | 0.87 | 0.26 | 0.58 | 1.13 |
| 11JY1299 | C5 RIL 57  | 31  | NP   | 2   | 49.33 | 30.63 | 6.83  | 3.26 | 0.56 | 0.16 | 0.62 | 0.72 |
| 11JY1301 | C5 RIL 59  | 32  | NP   | 2   | 53.66 | 44.13 | 11.16 | 4.76 | 0.96 | 0.30 | 0.82 | 1.26 |
| 11JY1305 | C5 RIL 64  | 33  | NP   | 2   | 59.33 | 41.63 | 11.07 | 3.65 | 0.89 | 0.26 | 0.70 | 1.14 |
| 11JY1310 | C5 RIL 68  | 34  | NP   | 2   | 46.83 | 39.13 | 7.16  | 2.79 | 0.43 | 0.14 | 0.84 | 0.57 |
| 11JY1312 | C5 RIL 70  | 35  | NP   | 2   | 58.66 | 37.80 | 12.77 | 3.55 | 0.89 | 0.29 | 0.64 | 1.18 |
| 11JY1315 | C5 RIL 82  | 36  | NP   | 2   | 45.16 | 36.30 | 7.32  | 2.11 | 0.51 | 0.17 | 0.80 | 0.68 |
| 11JY1316 | C5 RIL 74  | 37  | NP   | 2   | 51.66 | 33.13 | 9.83  | 2.71 | 0.90 | 0.22 | 0.64 | 1.12 |
| 11JY1318 | C5 RIL 78  | 38  | NP   | 2   | 55.66 | 36.47 | 10.07 | 3.09 | 0.81 | 0.24 | 0.66 | 1.06 |
| 11JY1319 | C5 RIL 79  | 39  | NP   | 2   | 54.16 | 35.30 | 9.68  | 2.53 | 0.68 | 0.19 | 0.65 | 0.87 |
| 11JY1320 | C5 RIL 80  | 40  | NP   | 2   | 49.33 | 40.47 | 6.88  | 2.44 | 0.61 | 0.19 | 0.82 | 0.80 |
| 11JY1323 | C5 RIL 84  | 41  | NP   | 2   | 51.66 | 44.80 | 10.21 | 3.13 | 0.77 | 0.23 | 0.87 | 1.00 |
| 11JY1324 | C5 RIL 86  | 42  | NP   | 2   | 46.66 | 37.13 | 9.01  | 2.96 | 0.63 | 0.21 | 0.80 | 0.83 |
| 11JY1326 | C5 RIL 88  | 43  | NP   | 2   | 52.99 | 40.47 | 9.48  | 2.62 | 0.65 | 0.22 | 0.76 | 0.86 |
| 11JY1327 | C5 RIL 89  | 44  | NP   | 2   | 56.66 | 36.80 | 12.10 | 3.81 | 0.84 | 0.28 | 0.65 | 1.12 |
| 11JY1328 | C5 RIL 90  | 45  | NP   | 2   | 48.33 | 37.47 | 11.88 | 3.65 | 0.79 | 0.24 | 0.78 | 1.03 |
| 11JY1329 | C5 RIL 92  | 46  | NP   | 2   | 47.66 | 36.30 | 11.23 | 2.98 | 0.65 | 0.23 | 0.76 | 0.88 |
| 11JY1333 | C5 RIL 96  | 47  | NP   | 2   | 63.99 | 42.80 | 15.15 | 4.42 | 1.12 | 0.34 | 0.67 | 1.46 |
| 11JY1334 | C5 RIL 99  | 48  | NP   | 2   | 56.99 | 45.47 | 12.33 | 4.53 | 0.99 | 0.34 | 0.80 | 1.33 |
| 11JY1336 | C5 RIL 102 | 49  | NP   | 2   | 46.99 | 32.47 | 7.47  | 2.00 | 0.68 | 0.19 | 0.69 | 0.88 |
| 11JY1337 | C5 RIL 103 | 50  | NP   | 2   | 44.66 | 33.80 | 7.68  | 2.55 | 0.64 | 0.17 | 0.76 | 0.82 |
| 11JY1339 | C5 RIL 106 | 51  | NP   | 2   | 60.33 | 33.13 | 15.23 | 4.88 | 1.20 | 0.35 | 0.55 | 1.55 |
| 11JY1341 | C5 RIL 108 | 52  | NP   | 2   | 42.83 | 36.80 | 5.07  | 2.82 | 0.38 | 0.19 | 0.86 | 0.57 |
| 11JY1349 | C5 RIL 119 | 53  | NP   | 2   | 53.33 | 44.63 | 7.77  | 3.44 | 0.70 | 0.24 | 0.84 | 0.93 |
| 11JY1350 | C5 RIL 120 | 54  | NP   | 2   | 49.99 | 39.30 | 8.47  | 3.76 | 0.61 | 0.18 | 0.79 | 0.79 |

| Seed ID  | Acc        | Gen | trt. | rep | SL    | RL    | SFW   | RFW  | SDW  | RDW  | RSR  | TDM  |
|----------|------------|-----|------|-----|-------|-------|-------|------|------|------|------|------|
| 11JY1351 | C5 RIL 121 | 55  | NP   | 2   | 57.83 | 45.80 | 12.62 | 4.48 | 0.89 | 0.26 | 0.79 | 1.15 |
| 11JY1352 | C5 RIL 122 | 56  | NP   | 2   | 46.66 | 43.97 | 8.59  | 2.68 | 0.63 | 0.15 | 0.94 | 0.77 |
| 11JY1354 | C5 RIL 124 | 57  | NP   | 2   | 56.99 | 36.30 | 11.26 | 3.00 | 0.92 | 0.27 | 0.64 | 1.19 |
| 11JY1356 | C5 RIL 126 | 58  | NP   | 2   | 51.66 | 33.30 | 7.98  | 2.26 | 0.61 | 0.15 | 0.64 | 0.76 |
| 11JY1357 | C5 RIL 128 | 59  | NP   | 2   | 51.66 | 25.30 | 9.17  | 2.69 | 0.70 | 0.17 | 0.49 | 0.87 |
| 11JY1360 | C5 RIL 131 | 60  | NP   | 2   | 45.99 | 39.30 | 9.07  | 4.37 | 0.69 | 0.25 | 0.85 | 0.94 |
| 11JY1362 | C5 RIL 133 | 61  | NP   | 2   | 48.33 | 42.63 | 9.60  | 2.49 | 0.60 | 0.15 | 0.88 | 0.75 |
| 11JY1363 | C5 RIL 134 | 62  | NP   | 2   | 46.99 | 51.97 | 7.63  | 2.67 | 0.59 | 0.19 | 1.11 | 0.77 |
| 11JY1364 | C5 RIL 135 | 63  | NP   | 2   | 56.66 | 49.97 | 14.55 | 5.62 | 1.16 | 0.37 | 0.88 | 1.54 |
| 11JY1365 | C5 RIL 137 | 64  | NP   | 2   | 51.33 | 48.30 | 8.48  | 3.24 | 0.57 | 0.14 | 0.94 | 0.71 |
| 11JY1366 | C5 RIL 138 | 65  | NP   | 2   | 45.66 | 44.63 | 8.55  | 2.99 | 0.61 | 0.15 | 0.98 | 0.76 |
| 11JY1367 | C5 RIL 139 | 66  | NP   | 2   | 45.33 | 32.80 | 4.08  | 1.75 | 0.26 | 0.08 | 0.72 | 0.34 |
| 11JY1368 | C5 RIL 140 | 67  | NP   | 2   | 52.33 | 37.97 | 9.76  | 3.28 | 0.78 | 0.18 | 0.73 | 0.96 |
| 11JY1369 | C5 RIL 141 | 68  | NP   | 2   | 53.33 | 47.63 | 14.11 | 4.48 | 1.07 | 0.24 | 0.89 | 1.31 |
| 11JY1370 | C5 RIL 142 | 69  | NP   | 2   | 36.83 | 30.80 | 5.03  | 1.47 | 0.29 | 0.05 | 0.84 | 0.34 |
| 11JY1372 | C5 RIL 144 | 70  | NP   | 2   | 57.66 | 57.97 | 12.67 | 4.35 | 1.10 | 0.33 | 1.01 | 1.43 |
| 11JY1374 | C5 RIL 146 | 71  | NP   | 2   | 49.16 | 41.13 | 9.97  | 2.53 | 0.59 | 0.15 | 0.84 | 0.73 |
| 11JY1376 | C5 RIL 150 | 72  | NP   | 2   | 57.83 | 44.80 | 11.36 | 3.31 | 0.79 | 0.19 | 0.77 | 0.97 |
| 11JY1377 | C5 RIL 151 | 73  | NP   | 2   | 58.50 | 40.60 | 12.78 | 3.38 | 1.00 | 0.35 | 0.69 | 1.35 |
| 11JY1378 | C5 RIL 152 | 74  | NP   | 2   | 41.20 | 30.00 | 4.64  | 1.25 | 0.36 | 0.13 | 0.73 | 0.49 |
| 11JY1379 | C5 RIL 153 | 75  | NP   | 2   | 50.15 | 26.25 | 6.71  | 2.00 | 0.55 | 0.14 | 0.52 | 0.69 |
| 11JY1382 | C5 RIL 156 | 76  | NP   | 2   | 56.10 | 26.00 | 7.80  | 1.22 | 0.73 | 0.18 | 0.46 | 0.91 |
| 11JY1383 | C5 RIL 157 | 77  | NP   | 2   | 34.80 | 25.40 | 4.55  | 1.30 | 0.36 | 0.12 | 0.73 | 0.48 |
| 11JY1384 | C5 RIL 158 | 78  | NP   | 2   | 53.03 | 51.73 | 9.24  | 2.65 | 0.77 | 0.22 | 0.98 | 0.99 |
| 11JY1385 | C5 RIL 159 | 79  | NP   | 2   | 50.25 | 36.95 | 8.00  | 2.97 | 0.50 | 0.15 | 0.74 | 0.65 |
| 11JY1387 | C5 RIL 161 | 80  | NP   | 2   | 55.97 | 33.60 | 7.88  | 1.98 | 0.58 | 0.13 | 0.60 | 0.71 |
| 11JY1388 | C5 RIL 162 | 81  | NP   | 2   | 54.50 | 35.30 | 4.85  | 1.33 | 0.40 | 0.10 | 0.65 | 0.50 |
| 11JY1389 | C5 RIL 163 | 82  | NP   | 2   | 50.00 | 27.75 | 6.38  | 1.56 | 0.48 | 0.15 | 0.56 | 0.63 |
| 11JY1391 | C5 RIL 165 | 83  | NP   | 2   | 52.30 | 33.20 | 8.53  | 1.25 | 0.62 | 0.21 | 0.63 | 0.83 |
| 11JY1394 | C5 RIL 169 | 84  | NP   | 2   | 33.60 | 31.80 | 2.72  | 0.60 | 0.21 | 0.10 | 0.95 | 0.31 |
| 11JY1396 | C5 RIL 171 | 85  | NP   | 2   | 45.15 | 23.05 | 5.05  | 1.04 | 0.38 | 0.40 | 0.51 | 0.78 |
| 11JY1397 | C5 RIL 172 | 86  | NP   | 2   | 51.57 | 30.67 | 6.95  | 1.80 | 0.57 | 0.18 | 0.59 | 0.75 |
| 11JY1399 | C5 RIL 174 | 87  | NP   | 2   | 43.00 | 24.00 | 7.47  | 2.29 | 0.61 | 0.19 | 0.56 | 0.80 |
| 11JY1400 | C5 RIL 176 | 88  | NP   | 2   | 52.17 | 43.60 | 10.48 | 3.13 | 0.84 | 0.26 | 0.84 | 1.10 |
| 11JY1401 | C5 RIL 177 | 89  | NP   | 2   | 48.27 | 44.03 | 8.20  | 2.44 | 0.64 | 0.16 | 0.91 | 0.80 |
| 11JY1402 | C5 RIL 178 | 90  | NP   | 2   | 46.35 | 28.50 | 6.11  | 2.25 | 0.49 | 0.16 | 0.61 | 0.65 |

| Seed ID  | Acc        | Gen | trt. | rep | SL    | RL    | SFW   | RFW  | SDW  | RDW  | RSR  | TDM  |
|----------|------------|-----|------|-----|-------|-------|-------|------|------|------|------|------|
| 11JY1404 | C5 RIL 182 | 91  | NP   | 2   | 39.30 | 28.50 | 6.55  | 2.45 | 0.55 | 0.20 | 0.73 | 0.75 |
| 11JY1405 | C5 RIL 183 | 92  | NP   | 2   | 46.07 | 30.20 | 8.56  | 2.38 | 0.74 | 0.21 | 0.66 | 0.95 |
| 11JY1406 | C5 RIL 184 | 93  | NP   | 2   | 41.00 | 40.00 | 6.72  | 2.82 | 0.51 | 0.22 | 0.98 | 0.73 |
| 11JY1409 | C5 RIL 187 | 94  | NP   | 2   | 42.60 | 32.90 | 5.77  | 2.30 | 0.46 | 0.17 | 0.77 | 0.63 |
| 11JY1410 | C5 RIL 188 | 95  | NP   | 2   | 36.20 | 33.50 | 5.98  | 1.54 | 0.39 | 0.14 | 0.93 | 0.53 |
| 11JY1412 | C5 RIL 191 | 96  | NP   | 2   | 51.00 | 47.10 | 11.01 | 3.12 | 0.98 | 0.30 | 0.92 | 1.28 |
| 11JY1413 | C5 RIL 192 | 97  | NP   | 2   | 41.85 | 36.95 | 5.58  | 1.96 | 0.49 | 0.19 | 0.88 | 0.68 |
| 11JY1414 | C5 RIL 193 | 98  | NP   | 2   | 32.00 | 52.40 | 4.38  | 1.51 | 0.35 | 0.20 | 1.64 | 0.55 |
| 11JY1416 | C5 RIL 195 | 99  | NP   | 2   | 44.20 | 28.30 | 6.58  | 1.02 | 0.66 | 0.25 | 0.64 | 0.91 |
| 11JY1418 | C5 RIL 198 | 100 | NP   | 2   | 41.90 | 42.90 | 6.41  | 2.03 | 0.55 | 0.25 | 1.02 | 0.80 |
| 11JY1420 | C5 RIL 200 | 101 | NP   | 2   | 34.00 | 27.20 | 8.75  | 2.46 | 0.70 | 0.30 | 0.80 | 1.00 |
| 11JY1421 | C5 RIL 203 | 102 | NP   | 2   | 32.00 | 29.40 | 5.50  | 1.11 | 0.37 | 0.17 | 0.92 | 0.54 |
| 11JY1422 | C5 RIL 204 | 103 | NP   | 2   | 32.00 | 34.40 | 5.50  | 1.11 | 0.47 | 0.16 | 1.08 | 0.63 |
| 11JY1423 | C5 RIL 205 | 104 | NP   | 2   | 42.70 | 34.30 | 6.08  | 1.10 | 0.49 | 0.15 | 0.80 | 0.64 |
| 11JY1424 | C5 RIL 206 | 105 | NP   | 2   | 53.23 | 38.80 | 9.46  | 3.26 | 0.76 | 0.27 | 0.73 | 1.03 |
| 11JY1425 | C5 RIL 207 | 106 | NP   | 2   | 34.30 | 31.80 | 4.04  | 2.15 | 0.29 | 0.14 | 0.93 | 0.43 |
| 11JY1426 | C5 RIL 208 | 107 | NP   | 2   | 33.40 | 32.40 | 9.18  | 4.96 | 0.54 | 0.29 | 0.97 | 0.83 |
| 11JY1428 | C5 RIL 210 | 108 | NP   | 2   | 43.95 | 39.00 | 11.45 | 4.83 | 0.85 | 0.30 | 0.89 | 1.15 |
| 11JY1429 | C5 RIL 211 | 109 | NP   | 2   | 40.33 | 32.80 | 2.57  | 1.69 | 0.49 | 0.11 | 0.81 | 0.60 |
| 11JY1429 | C5 RIL 211 | 110 | NP   | 2   | 24.50 | 27.65 | 11.51 | 1.23 | 0.18 | 0.11 | 1.13 | 0.29 |
| 11JY1431 | C5 RIL 214 | 111 | NP   | 2   | 36.70 | 36.70 | 7.90  | 3.84 | 0.59 | 0.22 | 1.00 | 0.81 |
| 11JY1433 | C5 RIL 216 | 112 | NP   | 2   | 23.60 | 27.10 | 3.62  | 1.99 | 0.31 | 0.15 | 1.15 | 0.46 |
| 11JY1434 | C5 RIL 217 | 113 | NP   | 2   | 26.50 | 19.50 | 2.98  | 1.01 | 0.23 | 0.10 | 0.74 | 0.33 |
| 11JY1435 | C5 RIL 218 | 114 | NP   | 2   | 35.55 | 30.90 | 5.81  | 2.34 | 0.45 | 0.16 | 0.87 | 0.61 |
| 11JY1437 | C5 RIL 220 | 115 | NP   | 2   | 54.80 | 32.70 | 10.88 | 3.82 | 0.78 | 0.22 | 0.60 | 1.00 |
| 11JY1440 | C5 RIL 225 | 116 | NP   | 2   | 30.60 | 31.40 | 3.63  | 1.53 | 0.22 | 0.10 | 1.03 | 0.32 |
| 11JY1442 | C5 RIL 227 | 117 | NP   | 2   | 35.70 | 29.23 | 8.25  | 3.96 | 0.56 | 0.25 | 0.82 | 0.81 |
| 11JY1444 | C5 RIL 229 | 118 | NP   | 2   | 39.50 | 43.80 | 11.81 | 3.83 | 0.72 | 0.27 | 1.11 | 0.99 |
| 11JY1454 | C5 RIL 240 | 119 | NP   | 2   | 35.25 | 34.40 | 8.13  | 2.58 | 0.56 | 0.18 | 0.98 | 0.74 |
| 11JY1455 | C5 RIL 241 | 120 | NP   | 2   | 39.55 | 28.00 | 5.47  | 1.61 | 0.39 | 0.18 | 0.71 | 0.57 |
| 11JY1456 | C5 RIL 243 | 121 | NP   | 2   | 50.45 | 40.45 | 13.09 | 3.70 | 0.86 | 0.26 | 0.80 | 1.12 |
| 11JY1459 | C5 RIL P2  | 122 | NP   | 2   | 40.50 | 37.20 | 8.28  | 3.47 | 0.66 | 0.27 | 0.92 | 0.93 |
| 11JY1460 | C5 RIL P1  | 123 | NP   | 2   | 35.70 | 32.00 | 3.91  | 3.00 | 0.53 | 0.21 | 0.90 | 0.74 |
| 11JY1461 | C6 RIL 3   | 124 | NP   | 2   | 41.90 | 24.30 | 3.84  | 0.89 | 0.31 | 0.14 | 0.58 | 0.45 |
| 11JY1462 | C6 RIL 14  | 125 | NP   | 2   | 54.43 | 45.70 | 6.62  | 3.48 | 0.49 | 0.14 | 0.84 | 0.63 |
| 11JY1463 | C6 RIL 23  | 126 | NP   | 2   | 66.67 | 53.33 | 12.89 | 5.05 | 1.06 | 0.35 | 0.80 | 1.41 |

| Seed ID  | Acc        | Gen | trt. | rep | SL    | RL    | SFW   | RFW  | SDW  | RDW  | RSR  | TDM  |
|----------|------------|-----|------|-----|-------|-------|-------|------|------|------|------|------|
| 11JY1464 | C6 RIL 24  | 127 | NP   | 2   | 43.67 | 36.08 | 7.81  | 3.30 | 0.96 | 0.21 | 0.83 | 1.17 |
| 11JY1465 | C6 RIL 25  | 128 | NP   | 2   | 67.27 | 51.30 | 21.12 | 8.72 | 1.30 | 0.44 | 0.76 | 1.74 |
| 11JY1466 | C6 RIL 29  | 129 | NP   | 2   | 50.30 | 40.47 | 13.03 | 4.68 | 0.91 | 0.29 | 0.80 | 1.20 |
| 11JY1468 | C6 RIL 144 | 130 | NP   | 2   | 80.50 | 43.40 | 26.44 | 8.23 | 2.15 | 0.63 | 0.54 | 2.78 |
| 11JY1469 | C6 RIL 203 | 131 | NP   | 2   | 64.87 | 32.47 | 15.95 | 6.01 | 1.12 | 0.39 | 0.50 | 1.51 |
| 11JY1470 | C6 RIL 212 | 132 | NP   | 2   | 61.00 | 35.80 | 15.68 | 4.22 | 1.51 | 0.46 | 0.59 | 1.97 |
| 11JY1472 | C6 RIL 219 | 133 | NP   | 2   | 55.60 | 47.80 | 10.95 | 3.43 | 0.74 | 0.24 | 0.86 | 0.98 |
| 11JY1473 | C6 RIL 239 | 134 | NP   | 2   | 61.30 | 48.47 | 16.20 | 5.55 | 1.21 | 0.43 | 0.79 | 1.64 |
| 11JY1474 | C6 RIL 243 | 135 | NP   | 2   | 58.80 | 45.00 | 12.54 | 4.43 | 0.97 | 0.37 | 0.77 | 1.34 |
| 11JY1475 | C6 RIL 272 | 136 | NP   | 2   | 55.83 | 49.93 | 8.81  | 2.78 | 0.58 | 0.12 | 0.89 | 0.70 |
| 11JY1476 | C6 RIL 273 | 137 | NP   | 2   | 51.00 | 44.30 | 12.93 | 4.46 | 1.07 | 0.46 | 0.87 | 1.53 |
| 11JY1477 | C6 RIL 283 | 138 | NP   | 2   | 65.95 | 38.45 | 15.40 | 4.99 | 1.35 | 0.41 | 0.58 | 1.76 |
| 11JY1478 | C6 RIL 293 | 139 | NP   | 2   | 75.37 | 40.07 | 21.15 | 4.93 | 1.56 | 0.48 | 0.53 | 2.04 |
| 11JY1479 | C6 RIL 298 | 140 | NP   | 2   | 44.50 | 41.70 | 7.28  | 1.40 | 0.96 | 0.18 | 0.94 | 1.14 |
| 11JY1480 | C6 RIL 303 | 141 | NP   | 2   | 55.53 | 40.50 | 15.09 | 3.79 | 1.02 | 0.35 | 0.73 | 1.37 |
| 11JY1481 | C6 RIL 327 | 142 | NP   | 2   | 40.00 | 31.00 | 6.00  | 3.10 | 0.49 | 0.24 | 0.78 | 0.73 |
| 11JY1482 | C6 RIL 341 | 143 | NP   | 2   | 42.00 | 39.00 | 8.71  | 4.32 | 0.68 | 0.31 | 0.93 | 0.99 |
| 11JY1483 | C6 RIL 348 | 144 | NP   | 2   | 17.00 | 26.00 | 1.30  | 0.92 | 0.15 | 0.08 | 1.53 | 0.23 |
| 11JY1484 | C6 RIL 402 | 145 | NP   | 2   | 47.00 | 42.00 | 10.16 | 5.81 | 0.87 | 0.45 | 0.89 | 1.32 |
| 11JY1485 | C6 RIL 403 | 146 | NP   | 2   | 34.50 | 30.00 | 3.47  | 1.00 | 0.30 | 0.11 | 0.87 | 0.41 |
| 11JY1487 | C6 RIL 5   | 147 | NP   | 2   | 55.23 | 37.90 | 6.01  | 2.25 | 0.44 | 0.12 | 0.69 | 0.56 |
| 11JY1488 | C6 RIL 7   | 148 | NP   | 2   | 35.00 | 37.00 | 6.03  | 2.86 | 0.57 | 0.35 | 1.06 | 0.92 |
| 11JY1489 | C6 RIL 10  | 149 | NP   | 2   | 53.60 | 36.55 | 10.85 | 3.76 | 0.75 | 0.27 | 0.68 | 1.02 |
| 11JY1490 | C6 RIL 15  | 150 | NP   | 2   | 58.63 | 43.70 | 15.23 | 6.08 | 1.12 | 0.45 | 0.75 | 1.57 |
| 11JY1491 | C6 RIL 19  | 151 | NP   | 2   | 56.93 | 41.13 | 10.67 | 3.55 | 0.78 | 0.27 | 0.72 | 1.05 |
| 11JY1493 | C6 RIL 21  | 152 | NP   | 2   | 55.80 | 43.45 | 11.79 | 3.04 | 0.89 | 0.30 | 0.78 | 1.19 |
| 11JY1494 | C6 RIL 23  | 153 | NP   | 2   | 59.20 | 50.00 | 9.35  | 2.74 | 0.78 | 0.29 | 0.84 | 1.07 |
| 11JY1495 | C6 RIL 24  | 154 | NP   | 2   | 55.70 | 47.37 | 12.48 | 4.89 | 0.98 | 0.52 | 0.85 | 1.50 |
| 11JY1496 | C6 RIL 25  | 155 | NP   | 2   | 55.43 | 45.87 | 11.61 | 3.40 | 0.91 | 0.37 | 0.83 | 1.28 |
| 11JY1497 | C6 RIL 28  | 156 | NP   | 2   | 33.60 | 38.90 | 3.47  | 0.70 | 0.30 | 0.15 | 1.16 | 0.45 |
| 11JY1498 | C6 RIL 29  | 157 | NP   | 2   | 43.37 | 37.57 | 10.92 | 5.49 | 0.84 | 0.40 | 0.87 | 1.24 |
| 11JY1499 | C6 RIL 30  | 158 | NP   | 2   | 57.25 | 41.90 | 6.78  | 3.38 | 0.52 | 0.20 | 0.73 | 0.72 |
| 11JY1500 | C6 RIL 31  | 159 | NP   | 2   | 49.05 | 39.25 | 10.85 | 3.59 | 0.90 | 0.34 | 0.80 | 1.24 |
| 11JY1501 | C6 RIL 32  | 160 | NP   | 2   | 72.70 | 43.50 | 22.53 | 7.05 | 1.66 | 0.57 | 0.60 | 2.23 |
| 11JY1502 | C6 RIL 33  | 161 | NP   | 2   | 38.40 | 33.80 | 6.37  | 2.09 | 0.44 | 0.13 | 0.88 | 0.57 |
| 11JY1503 | C6 RIL 36  | 162 | NP   | 2   | 56.23 | 39.20 | 12.64 | 5.16 | 1.07 | 0.37 | 0.70 | 1.44 |

| Seed ID  | Acc        | Gen | trt. | rep | SL    | RL    | SFW   | RFW  | SDW  | RDW  | RSR  | TDM  |
|----------|------------|-----|------|-----|-------|-------|-------|------|------|------|------|------|
| 11JY1504 | C6 RIL 39  | 163 | NP   | 2   | 56.97 | 44.87 | 15.14 | 5.76 | 0.94 | 0.35 | 0.79 | 1.29 |
| 11JY1505 | C6 RIL 40  | 164 | NP   | 2   | 55.63 | 49.33 | 12.88 | 3.20 | 0.86 | 0.29 | 0.89 | 1.15 |
| 11JY1506 | C6 RIL 42  | 165 | NP   | 2   | 59.93 | 36.63 | 15.54 | 3.76 | 1.44 | 0.43 | 0.61 | 1.87 |
| 11JY1508 | C6 RIL 47  | 166 | NP   | 2   | 73.00 | 57.45 | 22.63 | 5.77 | 1.89 | 0.64 | 0.79 | 2.53 |
| 11JY1509 | C6 RIL 49  | 167 | NP   | 2   | 41.50 | 29.70 | 13.52 | 1.45 | 0.27 | 0.12 | 0.72 | 0.39 |
| 11JY1510 | C6 RIL 50  | 168 | NP   | 2   | 57.93 | 53.97 | 16.19 | 4.16 | 1.27 | 0.44 | 0.93 | 1.71 |
| 11JY1511 | C6 RIL 52  | 169 | NP   | 2   | 51.50 | 36.00 | 6.82  | 3.64 | 0.48 | 0.18 | 0.70 | 0.66 |
| 11JY1512 | C6 RIL 53  | 170 | NP   | 2   | 56.57 | 49.70 | 13.85 | 2.69 | 0.93 | 0.37 | 0.88 | 1.30 |
| 11JY1513 | C6 RIL 57  | 171 | NP   | 2   | 42.30 | 36.20 | 6.52  | 1.25 | 0.45 | 0.16 | 0.86 | 0.61 |
| 11JY1514 | C6 RIL 58  | 172 | NP   | 2   | 57.20 | 38.50 | 11.49 | 2.30 | 0.72 | 0.21 | 0.67 | 0.93 |
| 11JY1515 | C6 RIL 59  | 173 | NP   | 2   | 43.25 | 35.65 | 6.02  | 0.99 | 0.41 | 0.13 | 0.82 | 0.54 |
| 11JY1516 | C6 RIL 60  | 174 | NP   | 2   | 45.95 | 39.20 | 7.99  | 2.95 | 0.59 | 0.26 | 0.85 | 0.85 |
| 11JY1517 | C6 RIL 64  | 175 | NP   | 2   | 58.87 | 32.20 | 8.10  | 1.93 | 0.67 | 0.16 | 0.55 | 0.83 |
| 11JY1518 | C6 RIL 65  | 176 | NP   | 2   | 66.13 | 51.87 | 15.18 | 3.97 | 0.98 | 0.25 | 0.78 | 1.23 |
| 11JY1519 | C6 RIL 66  | 177 | NP   | 2   | 57.70 | 51.00 | 13.13 | 4.68 | 0.90 | 0.26 | 0.88 | 1.16 |
| 11JY1520 | C6 RIL 68  | 178 | NP   | 2   | 52.30 | 41.80 | 8.25  | 2.00 | 0.60 | 0.17 | 0.80 | 0.77 |
| 11JY1521 | C6 RIL 69  | 179 | NP   | 2   | 47.30 | 51.90 | 9.83  | 3.33 | 0.65 | 0.22 | 1.10 | 0.87 |
| 11JY1522 | C6 RIL 70  | 180 | NP   | 2   | 50.61 | 48.40 | 6.91  | 1.76 | 0.40 | 0.12 | 0.96 | 0.52 |
| 11JY1523 | C6 RIL 72  | 181 | NP   | 2   | 65.70 | 55.60 | 18.04 | 6.07 | 1.11 | 0.38 | 0.85 | 1.49 |
| 11JY1524 | C6 RIL 74  | 182 | NP   | 2   | 50.87 | 47.10 | 12.26 | 4.24 | 0.70 | 0.22 | 0.93 | 0.92 |
| 11JY1525 | C6 RIL 76  | 183 | NP   | 2   | 46.70 | 44.40 | 10.11 | 3.49 | 0.60 | 0.25 | 0.95 | 0.85 |
| 11JY1527 | C6 RIL 79  | 184 | NP   | 2   | 40.93 | 33.20 | 6.62  | 1.70 | 0.54 | 0.21 | 0.81 | 0.75 |
| 11JY1528 | C6 RIL 83  | 185 | NP   | 2   | 65.20 | 35.17 | 16.59 | 5.08 | 1.33 | 0.37 | 0.54 | 1.70 |
| 11JY1529 | C6 RIL 85  | 186 | NP   | 2   | 56.80 | 46.70 | 12.22 | 2.72 | 0.86 | 0.34 | 0.82 | 1.20 |
| 11JY1530 | C6 RIL 86  | 187 | NP   | 2   | 60.45 | 38.25 | 9.97  | 1.42 | 0.65 | 0.18 | 0.63 | 0.83 |
| 11JY1531 | C6 RIL 91  | 188 | NP   | 2   | 61.53 | 37.37 | 18.02 | 4.65 | 1.42 | 0.42 | 0.61 | 1.84 |
| 11JY1532 | C6 RIL 94  | 189 | NP   | 2   | 44.63 | 39.13 | 6.18  | 1.44 | 0.44 | 0.13 | 0.88 | 0.57 |
| 11JY1533 | C6 RIL 95  | 190 | NP   | 2   | 54.30 | 51.63 | 9.93  | 3.97 | 0.72 | 0.26 | 0.95 | 0.98 |
| 11JY1534 | C6 RIL 97  | 191 | NP   | 2   | 50.23 | 49.03 | 6.74  | 2.58 | 0.42 | 0.13 | 0.98 | 0.55 |
| 11JY1535 | C6 RIL 103 | 192 | NP   | 2   | 29.60 | 43.30 | 4.10  | 2.46 | 0.26 | 0.11 | 1.46 | 0.37 |
| 11JY1536 | C6 RIL 104 | 193 | NP   | 2   | 43.73 | 33.93 | 4.23  | 1.41 | 0.28 | 0.10 | 0.78 | 0.38 |
| 11JY1537 | C6 RIL 107 | 194 | NP   | 2   | 34.50 | 24.70 | 3.03  | 0.61 | 0.21 | 0.07 | 0.72 | 0.28 |
| 11JY1538 | C6 RIL 108 | 195 | NP   | 2   | 56.17 | 38.65 | 11.07 | 3.02 | 0.72 | 0.22 | 0.69 | 0.94 |
| 11JY1539 | C6 RIL 109 | 196 | NP   | 2   | 42.50 | 38.07 | 3.68  | 1.49 | 0.23 | 0.09 | 0.90 | 0.32 |
| 11JY1540 | C6 RIL 112 | 197 | NP   | 2   | 53.53 | 39.13 | 8.83  | 3.03 | 0.55 | 0.16 | 0.73 | 0.71 |
| 11JY1541 | C6 RIL 113 | 198 | NP   | 2   | 54.83 | 41.00 | 13.25 | 3.09 | 0.98 | 0.30 | 0.75 | 1.28 |

| Seed ID  | Acc        | Gen | trt. | rep | SL    | RL    | SFW   | RFW  | SDW  | RDW  | RSR  | TDM  |
|----------|------------|-----|------|-----|-------|-------|-------|------|------|------|------|------|
| 11JY1542 | C6 RIL 115 | 199 | NP   | 2   | 67.10 | 35.60 | 13.19 | 1.89 | 1.11 | 0.24 | 0.53 | 1.35 |
| 11JY1543 | C6 RIL 116 | 200 | NP   | 2   | 44.60 | 40.65 | 4.10  | 0.42 | 0.32 | 0.11 | 0.91 | 0.43 |
| 11JY1544 | C6 RIL 117 | 201 | NP   | 2   | 32.66 | 43.00 | 10.41 | 1.43 | 0.75 | 0.27 | 1.32 | 1.02 |
| 11JY1545 | C6 RIL 120 | 202 | NP   | 2   | 62.77 | 49.30 | 9.00  | 3.10 | 0.62 | 0.17 | 0.79 | 0.79 |
| 11JY1546 | C6 RIL 121 | 203 | NP   | 2   | 61.00 | 33.15 | 14.21 | 2.05 | 1.15 | 0.35 | 0.54 | 1.50 |
| 11JY1547 | C6 RIL 123 | 204 | NP   | 2   | 67.80 | 34.60 | 15.90 | 2.71 | 1.35 | 0.43 | 0.51 | 1.78 |
| 11JY1548 | C6 RIL 124 | 205 | NP   | 2   | 50.83 | 40.05 | 9.84  | 1.30 | 0.76 | 0.25 | 0.79 | 1.01 |
| 11JY1549 | C6 RIL 127 | 206 | NP   | 2   | 47.80 | 32.13 | 7.77  | 1.99 | 0.60 | 0.16 | 0.67 | 0.76 |
| 11JY1550 | C6 RIL 131 | 207 | NP   | 2   | 63.85 | 31.85 | 13.18 | 3.11 | 1.07 | 0.22 | 0.50 | 1.29 |
| 11JY1551 | C6 RIL 134 | 208 | NP   | 2   | 62.45 | 32.70 | 11.33 | 5.35 | 1.67 | 0.34 | 0.52 | 2.01 |
| 11JY1552 | C6 RIL 135 | 209 | NP   | 2   | 61.97 | 39.70 | 14.72 | 4.42 | 1.11 | 0.29 | 0.64 | 1.40 |
| 11JY1553 | C6 RIL 138 | 210 | NP   | 2   | 63.20 | 42.77 | 13.85 | 4.37 | 1.05 | 0.33 | 0.68 | 1.38 |
| 11JY1554 | C6 RIL 139 | 211 | NP   | 2   | 36.70 | 28.90 | 2.50  | 0.60 | 0.20 | 0.08 | 0.79 | 0.28 |
| 11JY1555 | C6 RIL 140 | 212 | NP   | 2   | 59.10 | 37.90 | 9.65  | 1.58 | 1.19 | 0.20 | 0.64 | 1.39 |
| 11JY1556 | C6 RIL 141 | 213 | NP   | 2   | 46.93 | 35.03 | 5.03  | 1.34 | 0.35 | 0.09 | 0.75 | 0.44 |
| 11JY1557 | C6 RIL 142 | 214 | NP   | 2   | 79.55 | 39.60 | 25.80 | 6.96 | 1.82 | 0.61 | 0.50 | 2.43 |
| 11JY1558 | C6 RIL 143 | 215 | NP   | 2   | 62.35 | 44.55 | 14.41 | 3.57 | 1.05 | 0.31 | 0.71 | 1.36 |
| 11JY1560 | C6 RIL 146 | 216 | NP   | 2   | 53.15 | 43.70 | 8.52  | 1.79 | 0.61 | 0.16 | 0.82 | 0.77 |
| 11JY1561 | C6 RIL 147 | 217 | NP   | 2   | 28.60 | 27.50 | 2.30  | 0.36 | 0.19 | 0.10 | 0.96 | 0.29 |
| 11JY1562 | C6 RIL 148 | 218 | NP   | 2   | 44.77 | 42.05 | 4.88  | 0.87 | 0.41 | 0.16 | 0.94 | 0.57 |
| 11JY1563 | C6 RIL 150 | 219 | NP   | 2   | 44.40 | 41.20 | 5.56  | 0.84 | 0.49 | 0.14 | 0.93 | 0.63 |
| 11JY1565 | C6 RIL 153 | 220 | NP   | 2   | 43.50 | 42.70 | 9.78  | 1.92 | 0.73 | 0.28 | 0.98 | 1.01 |
| 11JY1566 | C6 RIL 156 | 221 | NP   | 2   | 39.90 | 38.80 | 3.47  | 0.49 | 0.46 | 0.17 | 0.97 | 0.63 |
| 11JY1567 | C6 RIL 160 | 222 | NP   | 2   | 63.67 | 37.40 | 11.28 | 3.81 | 0.87 | 0.25 | 0.59 | 1.12 |
| 11JY1568 | C6 RIL 161 | 223 | NP   | 2   | 53.55 | 36.15 | 8.38  | 2.95 | 0.59 | 0.17 | 0.68 | 0.76 |
| 11JY1569 | C6 RIL 162 | 224 | NP   | 2   | 62.00 | 35.55 | 9.73  | 2.57 | 0.74 | 0.16 | 0.57 | 0.90 |
| 11JY1570 | C6 RIL 163 | 225 | NP   | 2   | 48.20 | 32.93 | 7.85  | 2.28 | 0.53 | 0.14 | 0.68 | 0.67 |
| 11JY1571 | C6 RIL 164 | 226 | NP   | 2   | 59.15 | 37.40 | 9.12  | 2.62 | 0.43 | 0.17 | 0.63 | 0.60 |
| 11JY1572 | C6 RIL 169 | 227 | NP   | 2   | 58.30 | 28.37 | 7.78  | 1.21 | 0.61 | 0.15 | 0.49 | 0.76 |
| 11JY1573 | C6 RIL 171 | 228 | NP   | 2   | 58.43 | 31.40 | 8.59  | 1.44 | 0.69 | 0.17 | 0.54 | 0.86 |
| 11JY1574 | C6 RIL 172 | 229 | NP   | 2   | 69.25 | 52.10 | 15.82 | 4.97 | 1.14 | 0.42 | 0.75 | 1.56 |
| 11JY1576 | C6 RIL 174 | 230 | NP   | 2   | 37.70 | 32.40 | 1.87  | 0.48 | 0.16 | 0.08 | 0.86 | 0.24 |
| 11JY1577 | C6 RIL 175 | 231 | NP   | 2   | 28.10 | 26.30 | 1.80  | 0.65 | 0.17 | 0.10 | 0.94 | 0.27 |
| 11JY1578 | C6 RIL 176 | 232 | NP   | 2   | 46.93 | 31.13 | 5.91  | 1.37 | 0.55 | 0.18 | 0.66 | 0.73 |
| 11JY1579 | C6 RIL 179 | 233 | NP   | 2   | 31.80 | 31.60 | 2.56  | 0.23 | 0.26 | 0.08 | 0.99 | 0.34 |
| 11JY1580 | C6 RIL 181 | 234 | NP   | 2   | 38.80 | 30.40 | 3.85  | 0.54 | 0.40 | 0.16 | 0.78 | 0.56 |

| Seed ID  | Acc        | Gen | trt. | rep | SL    | RL    | SFW   | RFW  | SDW  | RDW  | RSR  | TDM  |
|----------|------------|-----|------|-----|-------|-------|-------|------|------|------|------|------|
| 11JY1581 | C6 RIL 184 | 235 | NP   | 2   | 54.60 | 32.80 | 5.13  | 0.94 | 0.49 | 0.21 | 0.60 | 0.70 |
| 11JY1582 | C6 RIL 186 | 236 | NP   | 2   | 57.47 | 38.07 | 10.62 | 5.34 | 0.85 | 0.26 | 0.66 | 1.11 |
| 11JY1583 | C6 RIL 187 | 237 | NP   | 2   | 40.80 | 33.80 | 3.45  | 0.39 | 0.33 | 0.13 | 0.83 | 0.46 |
| 11JY1584 | C6 RIL 188 | 238 | NP   | 2   | 52.07 | 53.53 | 7.13  | 1.23 | 0.61 | 0.18 | 1.03 | 0.79 |
| 11JY1585 | C6 RIL 189 | 239 | NP   | 2   | 53.40 | 37.60 | 9.51  | 1.86 | 0.75 | 0.25 | 0.70 | 1.00 |
| 11JY1586 | C6 RIL 190 | 240 | NP   | 2   | 60.47 | 35.73 | 8.03  | 1.48 | 0.57 | 0.13 | 0.59 | 0.70 |
| 11JY1587 | C6 RIL 192 | 241 | NP   | 2   | 50.00 | 43.60 | 7.10  | 2.57 | 0.25 | 0.15 | 0.87 | 0.40 |
| 11JY1588 | C6 RIL 193 | 242 | NP   | 2   | 63.90 | 51.10 | 7.94  | 2.54 | 0.53 | 0.15 | 0.80 | 0.68 |
| 11JY1589 | C6 RIL 203 | 243 | NP   | 2   | 61.23 | 46.43 | 8.28  | 1.49 | 0.56 | 0.12 | 0.76 | 0.68 |
| 11JY1590 | C6 RIL 204 | 244 | NP   | 2   | 50.00 | 31.95 | 7.09  | 1.88 | 0.45 | 0.15 | 0.64 | 0.60 |
| 11JY1591 | C6 RIL 205 | 245 | NP   | 2   | 52.15 | 44.05 | 5.06  | 1.35 | 0.31 | 0.11 | 0.84 | 0.42 |
| 11JY1592 | C6 RIL 206 | 246 | NP   | 2   | 47.80 | 50.50 | 3.39  | 0.85 | 0.30 | 0.10 | 1.06 | 0.40 |
| 11JY1593 | C6 RIL 207 | 247 | NP   | 2   | 54.10 | 30.30 | 9.09  | 3.08 | 0.70 | 0.21 | 0.56 | 0.91 |
| 11JY1594 | C6 RIL 211 | 248 | NP   | 2   | 51.00 | 20.35 | 4.44  | 0.45 | 0.33 | 0.10 | 0.40 | 0.43 |
| 11JY1595 | C6 RIL 212 | 249 | NP   | 2   | 58.13 | 39.97 | 9.24  | 1.60 | 0.63 | 0.16 | 0.69 | 0.79 |
| 11JY1596 | C6 RIL 217 | 250 | NP   | 2   | 40.60 | 28.90 | 3.59  | 0.35 | 0.30 | 0.11 | 0.71 | 0.41 |
| 11JY1597 | C6 RIL 218 | 251 | NP   | 2   | 54.00 | 36.80 | 8.23  | 1.76 | 0.59 | 0.16 | 0.68 | 0.75 |
| 11JY1598 | C6 RIL 219 | 252 | NP   | 2   | 67.35 | 42.75 | 11.19 | 2.43 | 0.81 | 0.18 | 0.63 | 0.99 |
| 11JY1599 | C6 RIL 220 | 253 | NP   | 2   | 46.30 | 28.30 | 4.47  | 0.56 | 0.45 | 0.19 | 0.61 | 0.64 |
| 11JY1600 | C6 RIL 225 | 254 | NP   | 2   | 59.70 | 31.57 | 11.55 | 3.01 | 0.75 | 0.24 | 0.53 | 0.99 |
| 11JY1601 | C6 RIL 230 | 255 | NP   | 2   | 52.75 | 56.05 | 7.83  | 2.97 | 0.57 | 0.21 | 1.06 | 0.78 |
| 11JY1602 | C6 RIL 231 | 256 | NP   | 2   | 52.75 | 51.05 | 7.83  | 2.97 | 0.79 | 0.30 | 0.97 | 1.09 |
| 11JY1603 | C6 RIL 232 | 257 | NP   | 2   | 57.20 | 47.60 | 11.57 | 5.02 | 0.83 | 0.32 | 0.83 | 1.15 |
| 11JY1604 | C6 RIL 234 | 258 | NP   | 2   | 71.53 | 48.67 | 12.34 | 3.43 | 0.80 | 0.22 | 0.68 | 1.02 |
| 11JY1605 | C6 RIL 235 | 259 | NP   | 2   | 64.37 | 44.50 | 13.60 | 5.12 | 0.93 | 0.26 | 0.69 | 1.19 |
| 11JY1606 | C6 RIL 236 | 260 | NP   | 2   | 56.07 | 35.77 | 11.10 | 3.38 | 0.71 | 0.20 | 0.64 | 0.91 |
| 11JY1607 | C6 RIL 238 | 261 | NP   | 2   | 61.97 | 41.30 | 13.78 | 4.62 | 0.88 | 0.26 | 0.67 | 1.14 |
| 11JY1608 | C6 RIL 239 | 262 | NP   | 2   | 26.40 | 25.70 | 1.00  | 0.34 | 0.45 | 0.11 | 0.97 | 0.56 |
| 11JY1609 | C6 RIL 241 | 263 | NP   | 2   | 61.43 | 43.00 | 10.73 | 4.39 | 0.85 | 0.21 | 0.70 | 1.06 |
| 11JY1610 | C6 RIL 243 | 264 | NP   | 2   | 62.50 | 55.85 | 9.85  | 3.20 | 0.70 | 0.18 | 0.89 | 0.88 |
| 11JY1611 | C6 RIL 245 | 265 | NP   | 2   | 62.50 | 55.85 | 9.85  | 3.20 | 0.70 | 0.18 | 0.89 | 0.88 |
| 11JY1612 | C6 RIL 249 | 266 | NP   | 2   | 43.37 | 35.73 | 3.08  | 2.06 | 0.42 | 0.15 | 0.82 | 0.57 |
| 11JY1613 | C6 RIL 253 | 267 | NP   | 2   | 65.47 | 49.57 | 15.24 | 3.78 | 1.01 | 0.24 | 0.76 | 1.25 |
| 11JY1614 | C6 RIL 258 | 268 | NP   | 2   | 59.00 | 41.10 | 8.83  | 3.01 | 0.70 | 0.20 | 0.70 | 0.90 |
| 11JY1616 | C6 RIL 261 | 269 | NP   | 2   | 34.20 | 39.80 | 2.34  | 0.59 | 0.19 | 0.09 | 1.16 | 0.28 |
| 11JY1617 | C6 RIL 262 | 270 | NP   | 2   | 46.90 | 29.85 | 4.72  | 1.31 | 0.32 | 0.13 | 0.64 | 0.45 |



| Seed ID  | Acc        | Gen | trt. | rep | SL    | RL    | SFW   | RFW  | SDW  | RDW  | RSR  | TDM  |
|----------|------------|-----|------|-----|-------|-------|-------|------|------|------|------|------|
| 11JY1619 | C6 RIL 265 | 271 | NP   | 2   | 61.77 | 51.17 | 9.28  | 2.64 | 0.69 | 0.15 | 0.83 | 0.84 |
| 11JY1620 | C6 RIL 267 | 272 | NP   | 2   | 58.00 | 51.03 | 9.49  | 2.58 | 0.60 | 0.16 | 0.88 | 0.76 |
| 11JY1621 | C6 RIL 268 | 273 | NP   | 2   | 47.77 | 47.73 | 0.75  | 3.69 | 0.30 | 0.09 | 1.00 | 0.39 |
| 11JY1622 | C6 RIL 270 | 274 | NP   | 2   | 59.60 | 42.33 | 10.23 | 3.91 | 0.71 | 0.23 | 0.71 | 0.94 |
| 11JY1623 | C6 RIL 272 | 275 | NP   | 2   | 61.80 | 44.57 | 9.72  | 4.61 | 0.74 | 0.26 | 0.72 | 1.00 |
| 11JY1624 | C6 RIL 273 | 276 | NP   | 2   | 48.83 | 37.27 | 4.38  | 1.84 | 0.46 | 0.13 | 0.76 | 0.59 |
| 11JY1625 | C6 RIL 275 | 277 | NP   | 2   | 53.57 | 30.70 | 9.05  | 3.65 | 0.73 | 0.21 | 0.57 | 0.94 |
| 11JY1626 | C6 RIL 276 | 278 | NP   | 2   | 48.17 | 35.90 | 6.64  | 2.82 | 0.48 | 0.18 | 0.75 | 0.66 |
| 11JY1627 | C6 RIL 282 | 279 | NP   | 2   | 66.67 | 39.97 | 17.68 | 6.14 | 1.71 | 0.50 | 0.60 | 2.21 |
| 11JY1628 | C6 RIL 283 | 280 | NP   | 2   | 72.37 | 39.17 | 15.19 | 7.91 | 1.35 | 0.56 | 0.54 | 1.91 |
| 11JY1629 | C6 RIL 284 | 281 | NP   | 2   | 65.75 | 36.70 | 14.86 | 7.23 | 1.13 | 0.41 | 0.56 | 1.54 |
| 11JY1630 | C6 RIL 286 | 282 | NP   | 2   | 67.40 | 50.15 | 18.46 | 8.26 | 1.54 | 0.53 | 0.74 | 2.07 |
| 11JY1631 | C6 RIL 287 | 283 | NP   | 2   | 61.80 | 53.60 | 14.20 | 5.25 | 1.33 | 0.36 | 0.87 | 1.69 |
| 11JY1632 | C6 RIL 288 | 284 | NP   | 2   | 34.70 | 33.20 | 1.75  | 0.54 | 0.16 | 0.06 | 0.96 | 0.22 |
| 11JY1633 | C6 RIL 289 | 285 | NP   | 2   | 68.00 | 33.60 | 11.65 | 4.87 | 1.02 | 0.29 | 0.49 | 1.31 |
| 11JY1634 | C6 RIL 291 | 286 | NP   | 2   | 67.60 | 58.90 | 16.24 | 7.32 | 1.39 | 0.46 | 0.87 | 1.85 |
| 11JY1635 | C6 RIL 292 | 287 | NP   | 2   | 41.27 | 44.93 | 5.98  | 2.40 | 0.53 | 0.20 | 1.09 | 0.73 |
| 11JY1636 | C6 RIL 293 | 288 | NP   | 2   | 72.53 | 50.03 | 16.77 | 8.12 | 1.36 | 0.51 | 0.69 | 1.87 |
| 11JY1637 | C6 RIL 295 | 289 | NP   | 2   | 66.03 | 57.75 | 14.72 | 4.93 | 1.26 | 0.40 | 0.87 | 1.66 |
| 11JY1638 | C6 RIL 297 | 290 | NP   | 2   | 64.47 | 34.63 | 14.28 | 3.78 | 1.18 | 0.28 | 0.54 | 1.46 |
| 11JY1639 | C6 RIL 298 | 291 | NP   | 2   | 55.60 | 44.07 | 8.93  | 3.05 | 0.79 | 0.18 | 0.79 | 0.97 |
| 11JY1640 | C6 RIL 300 | 292 | NP   | 2   | 58.37 | 34.30 | 15.17 | 4.55 | 1.15 | 0.38 | 0.59 | 1.53 |
| 11JY1641 | C6 RIL 303 | 293 | NP   | 2   | 60.33 | 45.67 | 10.70 | 3.54 | 1.01 | 0.29 | 0.76 | 1.30 |
| 11JY1642 | C6 RIL 310 | 294 | NP   | 2   | 67.00 | 58.00 | 12.55 | 6.57 | 1.07 | 0.46 | 0.87 | 1.53 |
| 11JY1643 | C6 RIL 314 | 295 | NP   | 2   | 37.60 | 25.80 | 1.88  | 0.48 | 0.19 | 0.07 | 0.69 | 0.26 |
| 11JY1644 | C6 RIL 315 | 296 | NP   | 2   | 74.17 | 36.67 | 17.16 | 5.74 | 1.13 | 0.34 | 0.49 | 1.47 |
| 11JY1645 | C6 RIL 316 | 297 | NP   | 2   | 66.50 | 59.00 | 16.56 | 5.78 | 1.08 | 0.38 | 0.89 | 1.46 |
| 11JY1646 | C6 RIL 317 | 298 | NP   | 2   | 66.00 | 47.00 | 16.41 | 6.58 | 1.22 | 0.44 | 0.71 | 1.66 |
| 11JY1647 | C6 RIL 318 | 299 | NP   | 2   | 52.50 | 44.50 | 8.42  | 3.03 | 0.67 | 0.26 | 0.85 | 0.93 |
| 11JY1648 | C6 RIL 319 | 300 | NP   | 2   | 46.00 | 47.00 | 5.54  | 1.72 | 0.42 | 0.18 | 1.02 | 0.60 |
| 11JY1649 | C6 RIL 320 | 301 | NP   | 2   | 64.07 | 40.33 | 13.53 | 5.70 | 1.00 | 0.35 | 0.63 | 1.35 |
| 11JY1650 | C6 RIL 321 | 302 | NP   | 2   | 37.75 | 36.50 | 4.26  | 0.98 | 0.28 | 0.11 | 0.97 | 0.39 |
| 11JY1651 | C6 RIL 322 | 303 | NP   | 2   | 63.33 | 50.17 | 16.41 | 4.96 | 1.21 | 0.44 | 0.79 | 1.65 |
| 11JY1652 | C6 RIL 324 | 304 | NP   | 2   | 63.70 | 52.53 | 11.10 | 4.99 | 0.92 | 0.40 | 0.82 | 1.32 |
| 11JY1653 | C6 RIL 327 | 305 | NP   | 2   | 72.90 | 48.37 | 15.74 | 4.56 | 1.22 | 0.38 | 0.66 | 1.60 |
| 11JY1654 | C6 RIL 328 | 306 | NP   | 2   | 59.50 | 29.10 | 5.28  | 1.77 | 0.31 | 0.12 | 0.49 | 0.43 |

| Seed ID  | Acc                                                                              | Gen | trt. | rep | SL    | RL    | SFW   | RFW  | SDW  | RDW  | RSR  | TDM  |
|----------|----------------------------------------------------------------------------------|-----|------|-----|-------|-------|-------|------|------|------|------|------|
| 11JY1655 | C6 RIL 330                                                                       | 307 | NP   | 2   | 73.53 | 48.50 | 15.58 | 6.81 | 0.94 | 0.35 | 0.66 | 1.29 |
| 11JY1656 | C6 RIL 332                                                                       | 308 | NP   | 2   | 79.97 | 58.63 | 16.90 | 5.69 | 1.30 | 0.41 | 0.73 | 1.71 |
| 11JY1657 | C6 RIL 333                                                                       | 309 | NP   | 2   | 68.63 | 62.43 | 13.80 | 6.26 | 1.13 | 0.43 | 0.91 | 1.56 |
| 11JY1658 | C6 RIL 335                                                                       | 310 | NP   | 2   | 46.00 | 46.50 | 8.61  | 4.26 | 0.80 | 0.26 | 1.01 | 1.06 |
| 11JY1659 | C6 RIL 336                                                                       | 311 | NP   | 2   | 32.00 | 33.50 | 5.33  | 3.12 | 0.45 | 0.23 | 1.05 | 0.68 |
| 11JY1660 | C6 RIL 339                                                                       | 312 | NP   | 2   | 39.00 | 36.67 | 5.81  | 2.76 | 0.45 | 0.20 | 0.94 | 0.65 |
| 11JY1661 | C6 RIL 340                                                                       | 313 | NP   | 2   | 46.73 | 41.33 | 6.59  | 3.26 | 0.57 | 0.22 | 0.88 | 0.79 |
| 11JY1662 | C6 RIL 341                                                                       | 314 | NP   | 2   | 45.67 | 48.00 | 8.09  | 4.19 | 0.60 | 0.26 | 1.05 | 0.86 |
| 11JY1663 | C6 RIL 342                                                                       | 315 | NP   | 2   | 49.50 | 51.67 | 9.86  | 3.63 | 0.78 | 0.28 | 1.04 | 1.06 |
| 11JY1664 | C6 RIL 344                                                                       | 316 | NP   | 2   | 43.50 | 35.67 | 6.65  | 2.54 | 0.56 | 0.20 | 0.82 | 0.76 |
| 11JY1665 | C6 RIL 346                                                                       | 317 | NP   | 2   | 53.97 | 30.43 | 5.60  | 2.04 | 0.48 | 0.16 | 0.56 | 0.64 |
| 11JY1666 | C6 RIL 347                                                                       | 318 | NP   | 2   | 59.33 | 55.33 | 10.29 | 3.49 | 1.07 | 0.33 | 0.93 | 1.40 |
| 11JY1667 | C6 RIL 349                                                                       | 319 | NP   | 2   | 61.50 | 53.50 | 11.09 | 4.35 | 0.91 | 0.34 | 0.87 | 1.25 |
| 11JY1668 | C6 RIL 352                                                                       | 320 | NP   | 2   | 46.67 | 50.00 | 7.10  | 2.00 | 0.61 | 0.18 | 1.07 | 0.79 |
| 11JY1669 | C6 RIL 354                                                                       | 321 | NP   | 2   | 19.00 | 31.00 | 1.13  | 0.62 | 0.13 | 0.11 | 1.63 | 0.24 |
| 11JY1670 | C6 RIL 355                                                                       | 322 | NP   | 2   | 37.00 | 51.33 | 7.20  | 2.09 | 0.66 | 0.32 | 1.39 | 0.98 |
| 11JY1671 | C6 RIL 356                                                                       | 323 | NP   | 2   | 52.67 | 39.67 | 12.50 | 5.30 | 0.97 | 0.34 | 0.75 | 1.31 |
| 11JY1672 | C6 RIL 358                                                                       | 324 | NP   | 2   | 51.67 | 53.67 | 10.66 | 3.82 | 0.87 | 0.28 | 1.04 | 1.15 |
| 11JY1673 | C6 RIL 361                                                                       | 325 | NP   | 2   | 41.50 | 45.00 | 5.97  | 2.31 | 0.53 | 0.18 | 1.08 | 0.71 |
| 11JY1674 | C6 RIL 362                                                                       | 326 | NP   | 2   | 55.67 | 45.67 | 13.96 | 4.39 | 0.83 | 0.24 | 0.82 | 1.07 |
| 11JY1675 | C6 RIL 364                                                                       | 327 | NP   | 2   | 68.33 | 67.67 | 22.97 | 8.53 | 1.44 | 0.51 | 0.99 | 1.95 |
| 11JY1676 | C6 RIL 366                                                                       | 328 | NP   | 2   | 51.95 | 38.45 | 4.97  | 2.34 | 0.46 | 0.16 | 0.74 | 0.62 |
| 11JY1677 | C6 RIL 368                                                                       | 329 | NP   | 2   | 52.67 | 41.67 | 6.49  | 1.88 | 0.48 | 0.16 | 0.79 | 0.64 |
| 11JY1678 | C6 RIL 372                                                                       | 330 | NP   | 2   | 64.33 | 58.33 | 24.70 | 6.63 | 2.05 | 0.53 | 0.91 | 2.58 |
| 11JY1680 | C6 RIL 379                                                                       | 331 | NP   | 2   | 37.00 | 30.00 | 5.81  | 1.01 | 0.22 | 0.09 | 0.81 | 0.31 |
| 11JY1682 | C6 RIL 382                                                                       | 332 | NP   | 2   | 55.50 | 38.00 | 13.56 | 4.24 | 1.25 | 0.43 | 0.68 | 1.68 |
| 11JY1683 | C6 RIL 388                                                                       | 333 | NP   | 2   | 63.17 | 42.00 | 10.34 | 5.74 | 1.20 | 0.49 | 0.66 | 1.69 |
| 11JY1684 | C6 RIL 391                                                                       | 334 | NP   | 2   | 64.67 | 40.33 | 17.00 | 7.25 | 1.27 | 0.49 | 0.62 | 1.76 |
| 11JY1686 | C6 RIL 394                                                                       | 335 | NP   | 2   | 66.67 | 51.67 | 17.41 | 5.76 | 1.23 | 0.46 | 0.78 | 1.69 |
| 11JY1687 | C6 RIL 395                                                                       | 336 | NP   | 2   | 65.67 | 50.33 | 19.50 | 6.22 | 1.22 | 0.36 | 0.77 | 1.58 |
| 11JY1688 | C6 RIL 398                                                                       | 337 | NP   | 2   | 71.00 | 43.00 | 16.84 | 7.37 | 1.22 | 0.44 | 0.61 | 1.66 |
| 11JY1689 | C6 RIL 400                                                                       | 338 | NP   | 2   | 72.00 | 42.67 | 14.01 | 6.33 | 1.16 | 0.45 | 0.59 | 1.61 |
| 11JY2045 | (CUBA/GUAD C1 F27-4-3-3-B-1-Bx[KILIMA ST94A]-30/MSV-03-2-10-B-2-B-B)-160-1-B-3-B | 339 | NP   | 2   | 61.46 | 52.15 | 11.33 | 2.60 | 0.67 | 0.20 | 0.85 | 0.87 |
| 11JY2047 | [[MSRXPOOL9]C1F2-176-4-7-X-1-B/CML206]-5-2-3-1-BBBBB-B-B-B                       | 340 | NP   | 2   | 65.96 | 49.48 | 18.42 | 4.45 | 1.17 | 0.33 | 0.75 | 1.50 |

| Seed ID  | Acc                                                                                                    | Gen | trt. | rep | SL    | RL    | SFW   | RFW  | SDW  | RDW  | RSR  | TDM  |
|----------|--------------------------------------------------------------------------------------------------------|-----|------|-----|-------|-------|-------|------|------|------|------|------|
| 11JY2051 | [CML199/[EV7992#/EV8449-SR]C1F2-334-1(OSU8i)-6-3-Sn]-B-23-2-2-B*4-B-B-B                                | 341 | NP   | 2   | 47.93 | 56.13 | 10.17 | 3.86 | 0.80 | 0.15 | 1.17 | 0.95 |
| 11JY2052 | [CML312/[TUXPSEQ]C1F2/P49-SR]F2-45-3-2-1-BB/[INTA-F2-192-2-1-1-1-BBBB]-1-5-1-1-1-BBB-B-B-B             | 342 | NP   | 2   | 60.96 | 37.15 | 15.69 | 4.23 | 0.97 | 0.29 | 0.61 | 1.26 |
| 11JY2053 | [CML312/CML445/[TUXPSEQ]C1F2/P49-SR]F2-45-3-2-1-BBB]-1-2-1-1-2-BBB-B-B-B                               | 343 | NP   | 2   | 47.79 | 36.30 | 7.94  | 2.10 | 0.46 | 0.09 | 0.76 | 0.54 |
| 11JY2054 | [CML312/MAS[MSR/312]-109-3]-B-71-3-BBB-B-B-B                                                           | 344 | NP   | 2   | 60.63 | 43.82 | 14.23 | 3.43 | 0.92 | 0.26 | 0.72 | 1.18 |
| 11JY2055 | [CML389/CML176]-B-29-2-2-B*5                                                                           | 345 | NP   | 2   | 58.63 | 57.15 | 14.96 | 4.09 | 0.89 | 0.27 | 0.97 | 1.16 |
| 11JY2056 | [CML395/CML440/[LPSC3H144-1-2-2-2-4-#-BB/SC/ZM605#b-19-2-X]-1-2-X-1-1-BB]-1-2-1-1-B]-3-2-1-1-BBB-B-B-B | 346 | NP   | 2   | 41.46 | 42.30 | 4.80  | 2.04 | 0.37 | 0.18 | 1.02 | 0.54 |
| 11JY2060 | [CML444/ZSR92354BULK-2-2-X-X-X-1-BB]-1-1-1-2/CML441]-1-1-1-2-BBB-B-B-B                                 | 347 | NP   | 2   | 38.13 | 41.97 | 2.44  | 0.99 | 0.18 | 0.03 | 1.10 | 0.20 |
| 11JY2061 | [DRB-F2-180-2/DRB-3-4-1]-X-6-1-3-BB-2-BBBBBB-B-B-B                                                     | 348 | NP   | 2   | 42.79 | 36.30 | 6.43  | 1.87 | 0.57 | 0.15 | 0.85 | 0.72 |
| 11JY2063 | [DTPWC8F31-4-2-1-6-B2/CML395/[CML445/ZM621B]-2-1-2-3-1-BB]-3-2-1-1-1-2-B-B-B                           | 349 | NP   | 2   | 51.46 | 49.65 | 11.58 | 2.54 | 0.65 | 0.18 | 0.96 | 0.83 |
| 11JY2064 | [Ent320:92SEW2-77/[DMRESR-W]EarlySel-#I-2-4-B/CML386]-B-11-3-B-2-#-B*4                                 | 350 | NP   | 2   | 35.79 | 37.30 | 3.14  | 1.49 | 0.35 | 0.08 | 1.04 | 0.43 |
| 11JY2065 | [LZ956441/LZ966205]-B-3-4-4-B-5-BBBBB-B-B-B                                                            | 351 | NP   | 2   | 49.46 | 53.30 | 7.79  | 3.01 | 0.74 | 0.21 | 1.08 | 0.94 |
| 11JY2066 | [MSRXPOOL9]C1F2-205-1(OSU23i)-5-3-X-X-1-B/[EV7992/EV8449...-3-2-2-1-BBBBB-B-B-B                        | 352 | NP   | 2   | 48.13 | 61.97 | 7.20  | 2.48 | 0.75 | 0.18 | 1.29 | 0.93 |
| 11JY2067 | [SYN-USAB2/SYN-ELIB2]-12-1-1-1-B*4-B-B-B                                                               | 353 | NP   | 2   | 53.79 | 68.63 | 11.89 | 5.18 | 0.97 | 0.26 | 1.28 | 1.22 |
| 11JY2070 | 02SADVE2B-#-42-1-1-1-1-B-B-B                                                                           | 354 | NP   | 2   | 43.46 | 50.63 | 5.55  | 1.81 | 0.41 | 0.09 | 1.17 | 0.50 |
| 11JY2071 | 02SADVL2B-#-16-2-1-B-B-B                                                                               | 355 | NP   | 2   | 44.79 | 47.63 | 4.40  | 1.92 | 0.30 | 0.06 | 1.06 | 0.36 |
| 11JY2075 | 20V-18                                                                                                 | 356 | NP   | 2   | 52.79 | 38.63 | 10.59 | 2.72 | 0.80 | 0.11 | 0.73 | 0.91 |
| 11JY2076 | 622016-ZCN-2                                                                                           | 357 | NP   | 2   | 56.79 | 38.97 | 9.04  | 2.43 | 0.54 | 0.08 | 0.69 | 0.62 |
| 11JY2078 | 761BB2 BCox751B-B-1-1-B-B-B-B-B                                                                        | 358 | NP   | 2   | 52.46 | 45.30 | 9.57  | 4.45 | 0.90 | 0.27 | 0.86 | 1.18 |
| 11JY2079 | BRAZ 2309                                                                                              | 359 | NP   | 2   | 47.13 | 45.63 | 2.47  | 1.01 | 0.20 | 0.05 | 0.97 | 0.25 |
| 11JY2081 | CL-04934 (P49C2H12-5-4xP23C2-11-1)-2-2-2-B*10                                                          | 360 | NP   | 2   | 56.96 | 43.65 | 13.36 | 4.21 | 0.90 | 0.25 | 0.77 | 1.15 |
| 11JY2083 | CML103                                                                                                 | 361 | NP   | 2   | 62.79 | 48.30 | 10.14 | 3.30 | 0.81 | 0.19 | 0.77 | 1.01 |
| 11JY2085 | CML114                                                                                                 | 362 | NP   | 2   | 43.13 | 34.97 | 4.44  | 1.71 | 0.32 | 0.08 | 0.81 | 0.41 |
| 11JY2086 | CML115                                                                                                 | 363 | NP   | 2   | 50.79 | 38.97 | 6.22  | 2.37 | 0.42 | 0.13 | 0.77 | 0.56 |

| Seed ID  | Acc                                                             | Gen | trt. | rep | SL    | RL    | SFW   | RFW  | SDW  | RDW  | RSR  | TDM  |
|----------|-----------------------------------------------------------------|-----|------|-----|-------|-------|-------|------|------|------|------|------|
| 11JY2087 | CML116                                                          | 364 | NP   | 2   | 46.13 | 40.97 | 4.59  | 1.45 | 0.29 | 0.05 | 0.89 | 0.34 |
| 11JY2088 | CML118                                                          | 365 | NP   | 2   | 44.13 | 53.30 | 4.49  | 2.39 | 0.36 | 0.07 | 1.21 | 0.43 |
| 11JY2090 | CML127                                                          | 366 | NP   | 2   | 48.13 | 54.97 | 6.01  | 2.68 | 0.52 | 0.10 | 1.14 | 0.63 |
| 11JY2091 | CML130                                                          | 367 | NP   | 2   | 56.13 | 42.30 | 8.38  | 3.02 | 0.45 | 0.31 | 0.75 | 0.76 |
| 11JY2092 | CML133                                                          | 368 | NP   | 2   | 47.13 | 46.30 | 7.34  | 3.47 | 0.52 | 0.19 | 0.98 | 0.71 |
| 11JY2093 | CML134                                                          | 369 | NP   | 2   | 46.79 | 36.30 | 4.59  | 0.93 | 0.40 | 0.06 | 0.78 | 0.46 |
| 11JY2094 | CML135                                                          | 370 | NP   | 2   | 56.13 | 40.97 | 12.73 | 4.54 | 0.90 | 0.28 | 0.73 | 1.18 |
| 11JY2102 | CML169                                                          | 371 | NP   | 2   | 54.33 | 31.80 | 7.27  | 2.57 | 0.53 | 0.19 | 0.59 | 0.72 |
| 11JY2103 | CML170                                                          | 372 | NP   | 2   | 42.83 | 30.80 | 6.28  | 2.90 | 0.50 | 0.21 | 0.72 | 0.71 |
| 11JY2107 | CML192                                                          | 373 | NP   | 2   | 59.16 | 38.47 | 8.23  | 1.85 | 0.55 | 0.17 | 0.65 | 0.72 |
| 11JY2108 | CML20                                                           | 374 | NP   | 2   | 49.49 | 33.13 | 6.32  | 2.29 | 0.51 | 0.17 | 0.67 | 0.68 |
| 11JY2109 | CML202                                                          | 375 | NP   | 2   | 51.49 | 30.80 | 7.97  | 2.63 | 0.57 | 0.17 | 0.60 | 0.74 |
| 11JY2110 | CML206                                                          | 376 | NP   | 2   | 55.16 | 45.80 | 10.44 | 3.34 | 0.73 | 0.22 | 0.83 | 0.95 |
| 11JY2112 | CML226                                                          | 377 | NP   | 2   | 47.83 | 30.13 | 4.81  | 1.37 | 0.34 | 0.14 | 0.63 | 0.47 |
| 11JY2114 | CML229                                                          | 378 | NP   | 2   | 56.49 | 30.47 | 11.87 | 4.94 | 0.87 | 0.31 | 0.54 | 1.18 |
| 11JY2117 | CML283                                                          | 379 | NP   | 2   | 47.83 | 31.80 | 7.74  | 2.67 | 0.60 | 0.20 | 0.66 | 0.80 |
| 11JY2122 | CML290                                                          | 380 | NP   | 2   | 53.16 | 41.13 | 7.96  | 3.52 | 0.57 | 0.24 | 0.77 | 0.81 |
| 11JY2125 | CML304                                                          | 381 | NP   | 2   | 59.49 | 38.13 | 13.28 | 4.73 | 1.01 | 0.34 | 0.64 | 1.35 |
| 11JY2126 | CML31                                                           | 382 | NP   | 2   | 47.16 | 34.80 | 5.85  | 1.81 | 0.41 | 0.15 | 0.74 | 0.56 |
| 11JY2127 | CML311/MBR C3 BC F23-1-2-1-B-B-B                                | 383 | NP   | 2   | 51.16 | 38.80 | 7.48  | 2.68 | 0.48 | 0.17 | 0.76 | 0.65 |
| 11JY2128 | CML311/MBR C3 BC F3-1-1-1-B-B-B                                 | 384 | NP   | 2   | 60.49 | 40.13 | 10.57 | 3.66 | 0.82 | 0.30 | 0.66 | 1.12 |
| 11JY2129 | CML311/MBR C3 BC F3-1-1-2-B-B                                   | 385 | NP   | 2   | 53.33 | 43.80 | 6.61  | 2.33 | 0.49 | 0.15 | 0.82 | 0.64 |
| 11JY2132 | CML311/MBR C3 BC F43-2-1-1-B-B-B                                | 386 | NP   | 2   | 62.49 | 41.47 | 13.51 | 4.69 | 0.98 | 0.33 | 0.66 | 1.31 |
| 11JY2133 | CML311/MBR C3 BC F65-1-2-2-B-B-B                                | 387 | NP   | 2   | 50.16 | 38.80 | 6.55  | 2.10 | 0.47 | 0.17 | 0.77 | 0.64 |
| 11JY2134 | CML311/MBR C3 BC F95-2-2-1-B-B-B                                | 388 | NP   | 2   | 54.16 | 40.80 | 9.64  | 3.25 | 0.75 | 0.25 | 0.75 | 1.00 |
| 11JY2136 | CML312SR                                                        | 389 | NP   | 2   | 41.49 | 31.47 | 4.71  | 1.58 | 0.37 | 0.14 | 0.76 | 0.52 |
| 11JY2137 | CML312SRQ=[[(CLQ-RCWQ83xCML312SR)xCML312SR]xCML312SR)]-15-1-BBB | 390 | NP   | 2   | 53.16 | 29.47 | 7.53  | 2.77 | 0.66 | 0.25 | 0.55 | 0.91 |
| 11JY2140 | CML322                                                          | 391 | NP   | 2   | 52.33 | 35.30 | 9.09  | 4.00 | 0.70 | 0.29 | 0.67 | 0.99 |
| 11JY2141 | CML323                                                          | 392 | NP   | 2   | 54.16 | 41.13 | 8.51  | 3.02 | 0.75 | 0.23 | 0.76 | 0.99 |
| 11JY2142 | CML325                                                          | 393 | NP   | 2   | 57.83 | 47.80 | 8.69  | 3.59 | 0.71 | 0.26 | 0.83 | 0.97 |
| 11JY2144 | CML328                                                          | 394 | NP   | 2   | 45.16 | 33.13 | 7.76  | 2.46 | 0.61 | 0.21 | 0.73 | 0.81 |
| 11JY2146 | CML338                                                          | 395 | NP   | 2   | 55.16 | 44.30 | 9.34  | 2.10 | 0.75 | 0.13 | 0.80 | 0.88 |
| 11JY2147 | CML360                                                          | 396 | NP   | 2   | 46.99 | 30.97 | 7.75  | 2.35 | 0.66 | 0.13 | 0.66 | 0.79 |
| 11JY2148 | CML361                                                          | 397 | NP   | 2   | 56.83 | 43.30 | 11.90 | 3.81 | 0.86 | 0.22 | 0.76 | 1.08 |

| Seed ID  | Acc                                            | Gen | trt. | rep | SL    | RL    | SFW   | RFW  | SDW  | RDW  | RSR  | TDM  |
|----------|------------------------------------------------|-----|------|-----|-------|-------|-------|------|------|------|------|------|
| 11JY2149 | CML364                                         | 398 | NP   | 2   | 46.08 | 34.65 | 6.64  | 2.12 | 0.37 | 0.16 | 0.75 | 0.53 |
| 11JY2150 | CML380xMBR/MDR C3 BC F21-1-1-2-B-B-B-3-1-B-B-B | 399 | NP   | 2   | 35.74 | 44.32 | 3.39  | 1.64 | 0.24 | 0.11 | 1.24 | 0.34 |
| 11JY2151 | CML384xMBR/MDR C3 BC F58-2-1-3-B-B-B-3-1-B-B-B | 400 | NP   | 2   | 52.74 | 27.65 | 7.92  | 2.07 | 0.61 | 0.16 | 0.52 | 0.77 |
| 11JY2152 | CML389                                         | 401 | NP   | 2   | 59.08 | 34.32 | 11.60 | 3.64 | 0.93 | 0.29 | 0.58 | 1.22 |
| 11JY2153 | CML389/CML144//CML159//POOL15QPMSR-B-6-B-B     | 402 | NP   | 2   | 51.74 | 37.98 | 9.65  | 1.93 | 0.71 | 0.28 | 0.73 | 0.99 |
| 11JY2154 | CML40                                          | 403 | NP   | 2   | 49.08 | 40.32 | 7.91  | 2.63 | 0.63 | 0.27 | 0.82 | 0.89 |
| 11JY2155 | CML402                                         | 404 | NP   | 2   | 47.74 | 23.65 | 4.43  | 1.45 | 0.34 | 0.14 | 0.50 | 0.48 |
| 11JY2157 | CML411                                         | 405 | NP   | 2   | 56.74 | 42.98 | 8.01  | 3.09 | 0.57 | 0.19 | 0.76 | 0.75 |
| 11JY2160 | CML423                                         | 406 | NP   | 2   | 58.41 | 45.98 | 14.19 | 4.09 | 0.77 | 0.26 | 0.79 | 1.03 |
| 11JY2162 | CML428                                         | 407 | NP   | 2   | 41.08 | 30.32 | 4.49  | 1.45 | 0.41 | 0.12 | 0.74 | 0.53 |
| 11JY2163 | CML430                                         | 408 | NP   | 2   | 45.74 | 34.98 | 3.76  | 1.69 | 0.39 | 0.13 | 0.76 | 0.51 |
| 11JY2164 | CML431                                         | 409 | NP   | 2   | 52.24 | 29.48 | 5.44  | 1.70 | 0.35 | 0.12 | 0.56 | 0.47 |
| 11JY2165 | CML432                                         | 410 | NP   | 2   | 54.08 | 23.65 | 7.15  | 1.31 | 0.47 | 0.10 | 0.44 | 0.57 |
| 11JY2166 | CML433                                         | 411 | NP   | 2   | 33.08 | 22.32 | 2.39  | 0.83 | 0.22 | 0.13 | 0.67 | 0.35 |
| 11JY2168 | CML445/CML144//CML159//POOL15QPMSR-B-55-B-B    | 412 | NP   | 2   | 43.74 | 29.32 | 9.12  | 2.19 | 0.74 | 0.20 | 0.67 | 0.93 |
| 11JY2170 | CML454                                         | 413 | NP   | 2   | 49.74 | 40.98 | 7.21  | 2.87 | 0.75 | 0.30 | 0.82 | 1.04 |
| 11JY2172 | CML468                                         | 414 | NP   | 2   | 67.74 | 33.98 | 10.21 | 2.95 | 0.90 | 0.21 | 0.50 | 1.11 |
| 11JY2173 | CML470                                         | 415 | NP   | 2   | 63.24 | 35.48 | 13.98 | 5.51 | 0.93 | 0.32 | 0.56 | 1.25 |
| 11JY2176 | CML479                                         | 416 | NP   | 2   | 42.74 | 29.98 | 5.62  | 1.51 | 0.58 | 0.16 | 0.70 | 0.75 |
| 11JY2177 | CML480                                         | 417 | NP   | 2   | 51.74 | 37.48 | 8.17  | 3.43 | 0.62 | 0.30 | 0.72 | 0.92 |
| 11JY2180 | CML496                                         | 418 | NP   | 2   | 51.41 | 57.98 | 3.93  | 1.50 | 0.33 | 0.11 | 1.13 | 0.44 |
| 11JY2189 | CML80                                          | 419 | NP   | 2   | 56.08 | 46.98 | 9.39  | 2.67 | 0.78 | 0.20 | 0.84 | 0.97 |
| 11JY2192 | CML94                                          | 420 | NP   | 2   | 60.74 | 49.98 | 8.43  | 3.09 | 0.60 | 0.20 | 0.82 | 0.80 |
| 11JY2193 | CML96                                          | 421 | NP   | 2   | 38.74 | 33.65 | 2.46  | 0.26 | 0.23 | 0.06 | 0.87 | 0.30 |
| 11JY2194 | CML99                                          | 422 | NP   | 2   | 40.74 | 25.98 | 4.81  | 1.75 | 0.38 | 0.15 | 0.64 | 0.53 |
| 11JY2196 | Cuba/GuadC3F125-2-2-1-B-B-B                    | 423 | NP   | 2   | 52.91 | 47.22 | 11.84 | 2.59 | 0.63 | 0.23 | 0.89 | 0.86 |
| 11JY2197 | CY9169                                         | 424 | NP   | 2   | 55.22 | 27.06 | 10.20 | 2.33 | 0.69 | 0.16 | 0.49 | 0.85 |
| 11JY2198 | DTPW C9                                        | 425 | NP   | 2   | 52.55 | 34.06 | 9.21  | 2.75 | 0.72 | 0.19 | 0.65 | 0.91 |
| 11JY2199 | DTPWC9-F104-5-4-1-1-B-B-B                      | 426 | NP   | 2   | 66.05 | 52.56 | 13.98 | 3.50 | 1.08 | 0.24 | 0.80 | 1.32 |
| 11JY2200 | DTPY C9                                        | 427 | NP   | 2   | 42.55 | 36.56 | 8.63  | 2.70 | 0.67 | 0.22 | 0.86 | 0.88 |
| 11JY2201 | DTPYC9-F46-1-2-1-2-B-B                         | 428 | NP   | 2   | 59.22 | 41.73 | 9.79  | 2.66 | 0.68 | 0.19 | 0.70 | 0.88 |
| 11JY2202 | DTPYC9-F46-3-9-1-1-B-BTL-07B 6614-42           | 429 | NP   | 2   | 48.05 | 35.06 | 6.90  | 2.10 | 0.44 | 0.11 | 0.73 | 0.55 |

| Seed ID  | Acc                                | Gen | trt. | rep | SL    | RL    | SFW   | RFW  | SDW  | RDW  | RSR  | TDM  |
|----------|------------------------------------|-----|------|-----|-------|-------|-------|------|------|------|------|------|
| 11JY2204 | Guad 6                             | 430 | NP   | 2   | 56.88 | 43.73 | 11.55 | 3.68 | 0.76 | 0.22 | 0.77 | 0.98 |
| 11JY2205 | H-16                               | 431 | NP   | 2   | 57.55 | 55.73 | 9.96  | 4.62 | 0.91 | 0.30 | 0.97 | 1.21 |
| 11JY2207 | La Posta Seq C7-F125-2-1-1-2-B-B-B | 432 | NP   | 2   | 48.55 | 43.73 | 10.34 | 3.51 | 0.72 | 0.22 | 0.90 | 0.94 |
| 11JY2211 | La Posta Seq C7-F64-2-6-1-2-B-B-B  | 433 | NP   | 2   | 58.05 | 47.56 | 12.12 | 4.48 | 0.84 | 0.29 | 0.82 | 1.13 |
| 11JY2216 | La Posta Seq C7-F96-1-2-1-2-B-B    | 434 | NP   | 2   | 47.22 | 53.39 | 9.50  | 3.63 | 0.62 | 0.22 | 1.13 | 0.85 |
| 11JY2218 | LPSC7                              | 435 | NP   | 2   | 58.55 | 58.73 | 11.20 | 3.16 | 0.72 | 0.20 | 1.00 | 0.92 |
| 11JY2220 | MAS[206/312]-23-2-1-1-B*6-B-B-B    | 436 | NP   | 2   | 56.55 | 35.73 | 11.54 | 2.77 | 0.78 | 0.22 | 0.63 | 1.00 |
| 11JY2223 | MBR C6 BC F234-1-B-#-1-1-B-B-B-B-B | 437 | NP   | 2   | 51.88 | 44.06 | 10.24 | 2.60 | 0.73 | 0.18 | 0.85 | 0.91 |
| 11JY2225 | P402c2F2-695-2-BB-2-B*4-1-B        | 438 | NP   | 2   | 48.05 | 48.56 | 10.54 | 2.59 | 0.66 | 0.21 | 1.01 | 0.87 |
| 11JY2228 | P591c4 F55-2-2-2-B-B-B             | 439 | NP   | 2   | 71.05 | 39.56 | 9.00  | 5.21 | 0.76 | 0.17 | 0.56 | 0.93 |
| 11JY2229 | P591c41y2GENF3-1-1-2-B-B-B         | 440 | NP   | 2   | 45.55 | 40.06 | 7.43  | 2.14 | 0.44 | 0.15 | 0.88 | 0.59 |
| 11JY2230 | PAZM 6053                          | 441 | NP   | 2   | 42.05 | 38.06 | 7.86  | 2.08 | 0.54 | 0.15 | 0.91 | 0.69 |
| 11JY2231 | Pool 21 x Pool 22                  | 442 | NP   | 2   | 47.22 | 30.73 | 7.35  | 2.29 | 0.48 | 0.14 | 0.65 | 0.62 |
| 11JY2233 | R15                                | 443 | NP   | 2   | 55.55 | 51.06 | 10.26 | 2.68 | 0.69 | 0.23 | 0.92 | 0.92 |
| 11JY2234 | RDOM 330                           | 444 | NP   | 2   | 45.05 | 30.06 | 8.00  | 2.30 | 0.54 | 0.13 | 0.67 | 0.67 |
| 11JY2238 | VL0512452                          | 445 | NP   | 2   | 52.88 | 35.06 | 10.30 | 2.86 | 0.73 | 0.18 | 0.66 | 0.91 |
| 11JY2239 | VL0512464                          | 446 | NP   | 2   | 58.22 | 41.39 | 11.09 | 2.29 | 0.81 | 0.17 | 0.71 | 0.98 |
| 11JY2240 | VL05128                            | 447 | NP   | 2   | 57.54 | 45.85 | 11.04 | 2.53 | 0.56 | 0.16 | 0.80 | 0.71 |
| 11JY2241 | VL052                              | 448 | NP   | 2   | 68.54 | 37.85 | 14.72 | 2.79 | 0.89 | 0.19 | 0.55 | 1.08 |
| 11JY2243 | VL05353                            | 449 | NP   | 2   | 71.71 | 48.35 | 18.58 | 4.31 | 1.13 | 0.26 | 0.67 | 1.40 |
| 11JY2244 | VL054178                           | 450 | NP   | 2   | 49.54 | 39.18 | 10.49 | 2.48 | 0.61 | 0.14 | 0.79 | 0.76 |
| 11JY2246 | VL054881                           | 451 | NP   | 2   | 61.88 | 49.85 | 11.96 | 3.15 | 0.71 | 0.19 | 0.81 | 0.90 |
| 11JY2248 | VL0556                             | 452 | NP   | 2   | 49.21 | 52.52 | 9.99  | 2.60 | 0.55 | 0.17 | 1.07 | 0.72 |
| 11JY2249 | VL05561                            | 453 | NP   | 2   | 56.54 | 49.18 | 11.60 | 3.52 | 0.66 | 0.22 | 0.87 | 0.88 |
| 11JY2250 | VL0558                             | 454 | NP   | 2   | 45.88 | 44.52 | 11.18 | 2.74 | 0.61 | 0.20 | 0.97 | 0.81 |
| 11JY2252 | VL05616                            | 455 | NP   | 2   | 51.83 | 42.80 | 10.41 | 2.47 | 0.57 | 0.18 | 0.83 | 0.75 |
| 11JY2255 | VL056942                           | 456 | NP   | 2   | 60.83 | 58.30 | 13.85 | 3.58 | 0.86 | 0.28 | 0.96 | 1.14 |
| 11JY2259 | VL062784                           | 457 | NP   | 2   | 54.33 | 38.80 | 9.94  | 2.19 | 0.53 | 0.14 | 0.71 | 0.67 |
| 11JY2260 | VL062785                           | 458 | NP   | 2   | 66.33 | 39.80 | 14.47 | 3.24 | 0.89 | 0.24 | 0.60 | 1.13 |
| 11JY2262 | VL06384                            | 459 | NP   | 2   | 47.99 | 31.97 | 10.65 | 2.40 | 0.65 | 0.10 | 0.67 | 0.75 |
| 11JY2263 | ZM521B-66-4-1-1-BB-B-B-B           | 460 | NP   | 2   | 59.74 | 46.88 | 12.46 | 3.11 | 0.65 | 0.24 | 0.78 | 0.89 |
| 11JY2264 | 川29♀                               | 461 | NP   | 2   | 60.24 | 45.55 | 12.79 | 2.70 | 0.68 | 0.21 | 0.76 | 0.89 |
| 11JY2265 | 慈溪白糯                               | 462 | NP   | 2   | 48.74 | 44.88 | 10.50 | 2.59 | 0.51 | 0.21 | 0.92 | 0.72 |
| 11JY2266 | 独紫                                 | 463 | NP   | 2   | 69.24 | 55.88 | 13.57 | 3.38 | 0.71 | 0.26 | 0.81 | 0.97 |
| 11JY2268 | 交51                                | 464 | NP   | 2   | 56.91 | 43.22 | 12.45 | 2.84 | 0.72 | 0.24 | 0.76 | 0.95 |
| 11JY2269 | 双M9                                | 465 | NP   | 2   | 47.91 | 40.55 | 10.91 | 2.48 | 0.55 | 0.22 | 0.85 | 0.77 |

| Seed ID  | Acc                                                                      | Gen | trt. | rep | SL    | RL    | SFW   | RFW  | SDW  | RDW  | RSR  | TDM  |
|----------|--------------------------------------------------------------------------|-----|------|-----|-------|-------|-------|------|------|------|------|------|
| 11JY2270 | 四川地方种质                                                                   | 466 | NP   | 2   | 69.24 | 50.88 | 15.98 | 3.74 | 0.97 | 0.35 | 0.73 | 1.32 |
| 11JY2271 | 豫综BC15-2                                                                 | 467 | NP   | 2   | 55.24 | 39.55 | 11.27 | 2.70 | 0.59 | 0.21 | 0.72 | 0.79 |
| 11JY2279 | 407                                                                      | 468 | NP   | 2   | 50.58 | 36.88 | 11.00 | 2.35 | 0.53 | 0.21 | 0.73 | 0.74 |
| 11JY2280 | 412                                                                      | 469 | NP   | 2   | 36.99 | 36.97 | 5.72  | 1.54 | 0.35 | 0.09 | 1.00 | 0.44 |
| 11JY2288 | 485                                                                      | 470 | NP   | 2   | 50.49 | 44.97 | 12.83 | 3.66 | 0.79 | 0.19 | 0.89 | 0.98 |
| 11JY2290 | 495                                                                      | 471 | NP   | 2   | 51.99 | 39.47 | 9.49  | 3.10 | 0.62 | 0.20 | 0.76 | 0.82 |
| 11JY2311 | 8001                                                                     | 472 | NP   | 2   | 57.83 | 39.80 | 11.86 | 2.66 | 0.66 | 0.18 | 0.69 | 0.84 |
| 11JY2317 | [(CML395/CML444)-B-4-1-3-1-B/CML395//DTPWC8F31-1-1-2-2]-5-1-2-2-BB-B-B-B | 473 | NP   | 2   | 41.99 | 62.47 | 6.06  | 2.02 | 0.46 | 0.08 | 1.49 | 0.54 |
| 11JY2327 | 4F1                                                                      | 474 | NP   | 2   | 47.49 | 40.63 | 8.86  | 3.04 | 0.61 | 0.17 | 0.86 | 0.77 |
| 11JY2356 | B73                                                                      | 475 | NP   | 2   | 54.99 | 34.63 | 11.89 | 2.29 | 0.88 | 0.21 | 0.63 | 1.09 |
| 11JY2391 | E28                                                                      | 476 | NP   | 2   | 50.13 | 35.63 | 10.15 | 2.40 | 0.80 | 0.17 | 0.71 | 0.97 |
| 11JY2394 | ES40                                                                     | 477 | NP   | 2   | 42.49 | 31.47 | 8.61  | 1.99 | 0.59 | 0.09 | 0.74 | 0.68 |
| 11JY2396 | F42                                                                      | 478 | NP   | 2   | 61.79 | 46.97 | 20.02 | 8.32 | 1.22 | 0.38 | 0.76 | 1.60 |
| 11JY2398 | FR19                                                                     | 479 | NP   | 2   | 44.79 | 55.97 | 6.38  | 2.70 | 0.45 | 0.10 | 1.25 | 0.55 |
| 11JY2426 | MBNA                                                                     | 480 | NP   | 2   | 60.21 | 48.18 | 13.13 | 3.58 | 0.76 | 0.23 | 0.80 | 0.99 |
| 11JY2434 | NS701                                                                    | 481 | NP   | 2   | 56.21 | 43.85 | 11.04 | 2.67 | 0.58 | 0.16 | 0.78 | 0.74 |
| 11JY2445 | PHG83                                                                    | 482 | NP   | 2   | 57.21 | 46.18 | 12.13 | 3.10 | 0.65 | 0.22 | 0.81 | 0.87 |
| 11JY2446 | PHN47                                                                    | 483 | NP   | 2   | 54.21 | 42.35 | 13.69 | 3.76 | 0.79 | 0.20 | 0.78 | 1.00 |
| 11JY2453 | R09                                                                      | 484 | NP   | 2   | 54.49 | 26.97 | 11.69 | 3.27 | 0.98 | 0.23 | 0.49 | 1.21 |
| 11JY2467 | Va35                                                                     | 485 | NP   | 2   | 52.83 | 42.13 | 11.70 | 2.78 | 0.57 | 0.18 | 0.80 | 0.75 |
| 11JY2470 | W8304                                                                    | 486 | NP   | 2   | 62.16 | 41.80 | 13.36 | 2.82 | 0.81 | 0.23 | 0.67 | 1.04 |
| 11JY2474 | XZY364-1                                                                 | 487 | NP   | 2   | 43.16 | 47.97 | 2.15  | 1.81 | 0.35 | 0.09 | 1.11 | 0.45 |
| 11JY2491 | 长3154                                                                    | 488 | NP   | 2   | 55.83 | 51.80 | 12.82 | 3.30 | 0.74 | 0.29 | 0.93 | 1.03 |
| 11JY2498 | 丹3130                                                                    | 489 | NP   | 2   | 52.33 | 47.30 | 10.23 | 3.19 | 0.52 | 0.24 | 0.90 | 0.76 |
| 11JY2500 | 丹340                                                                     | 490 | NP   | 2   | 45.66 | 34.80 | 5.68  | 2.35 | 0.40 | 0.14 | 0.76 | 0.54 |
| 11JY2504 | 丹360                                                                     | 491 | NP   | 2   | 56.83 | 44.13 | 11.19 | 2.54 | 0.62 | 0.17 | 0.78 | 0.79 |
| 11JY2522 | 辐746                                                                     | 492 | NP   | 2   | 63.83 | 43.47 | 13.00 | 2.91 | 0.78 | 0.22 | 0.68 | 1.00 |
| 11JY2526 | 旱21                                                                      | 493 | NP   | 2   | 58.83 | 44.80 | 10.88 | 2.71 | 0.57 | 0.23 | 0.76 | 0.80 |
| 11JY2547 | 吉419                                                                     | 494 | NP   | 2   | 75.83 | 67.47 | 17.94 | 4.58 | 1.11 | 0.32 | 0.89 | 1.43 |
| 11JY2557 | 吉846                                                                     | 495 | NP   | 2   | 68.88 | 46.52 | 13.90 | 3.17 | 0.84 | 0.21 | 0.68 | 1.05 |
| 11JY2563 | 冀研01-3-2-2-1-5-1                                                         | 496 | NP   | 2   | 53.88 | 47.85 | 11.84 | 2.88 | 0.59 | 0.14 | 0.89 | 0.73 |
| 11JY2570 | 金黄96C                                                                    | 497 | NP   | 2   | 62.71 | 46.35 | 13.35 | 3.50 | 0.67 | 0.18 | 0.74 | 0.86 |
| 11JY2574 | 辽138                                                                     | 498 | NP   | 2   | 55.54 | 48.18 | 13.52 | 3.27 | 0.73 | 0.19 | 0.87 | 0.92 |

| Seed ID  | Acc                                                                             | Gen | trt. | rep | SL    | RL    | SFW   | RFW  | SDW  | RDW  | RSR  | TDM  |
|----------|---------------------------------------------------------------------------------|-----|------|-----|-------|-------|-------|------|------|------|------|------|
| 11JY2587 | 辽孤001                                                                           | 499 | NP   | 2   | 56.58 | 45.55 | 13.73 | 2.72 | 0.64 | 0.23 | 0.81 | 0.86 |
| 11JY2603 | 齐205                                                                            | 500 | NP   | 2   | 57.58 | 41.88 | 12.34 | 2.71 | 0.72 | 0.23 | 0.73 | 0.96 |
| 11JY2606 | 齐310                                                                            | 501 | NP   | 2   | 49.58 | 39.22 | 11.06 | 2.46 | 0.50 | 0.20 | 0.79 | 0.70 |
| 11JY2621 | 双105                                                                            | 502 | NP   | 2   | 58.24 | 43.22 | 12.04 | 2.60 | 0.64 | 0.18 | 0.74 | 0.81 |
| 11JY2623 | 双741                                                                            | 503 | NP   | 2   | 55.91 | 45.55 | 11.88 | 2.55 | 0.62 | 0.21 | 0.81 | 0.83 |
| 11JY2667 | 郑22                                                                             | 504 | NP   | 2   | 68.88 | 51.52 | 20.51 | 4.74 | 1.15 | 0.27 | 0.75 | 1.42 |
| 11JY2672 | 郑29                                                                             | 505 | NP   | 2   | 69.71 | 57.85 | 20.07 | 3.70 | 1.15 | 0.26 | 0.83 | 1.41 |
| 11JY2675 | 郑30                                                                             | 506 | NP   | 2   | 61.54 | 52.85 | 14.24 | 3.61 | 0.78 | 0.15 | 0.86 | 0.94 |
| 11JY2677 | 郑35                                                                             | 507 | NP   | 2   | 59.54 | 56.52 | 15.35 | 3.14 | 0.86 | 0.20 | 0.95 | 1.06 |
| 11JY2697 | 综31                                                                             | 508 | NP   | 2   | 64.21 | 36.85 | 14.74 | 3.10 | 0.83 | 0.20 | 0.57 | 1.03 |
| 12JY0001 | C5 RIL P2                                                                       | 509 | NP   | 2   | 53.83 | 43.30 | 10.64 | 4.15 | 0.71 | 0.25 | 0.80 | 0.96 |
| 12JY0002 | C5 RIL P1                                                                       | 510 | NP   | 2   | 52.33 | 44.13 | 8.47  | 3.11 | 0.53 | 0.14 | 0.84 | 0.68 |
| 12JY0015 | [(SML*SMQPM)*(MTL*SMQPM)]F1S6-1-25-BB-1-B                                       | 511 | NP   | 2   | 68.49 | 32.97 | 12.65 | 3.64 | 0.58 | 0.21 | 0.48 | 0.79 |
| 12JY0017 | [CML159/[CML159/[MSRXPOOL9]C1F2-205-1(OSU23i)-5-3-X-X-1-BB]F2-3sx]-8-1-1-BB-1-B | 512 | NP   | 2   | 53.16 | 40.30 | 12.14 | 3.46 | 0.63 | 0.22 | 0.76 | 0.85 |
| 12JY0018 | [CML198/LPSC3H144-1-2-2-2-2-#-BB]-1-4-1-1-4-B*4-B-B-B                           | 513 | NP   | 2   | 51.83 | 50.97 | 10.22 | 3.62 | 0.68 | 0.28 | 0.98 | 0.95 |
| 12JY0029 | [DTPWC8F31-4-2-1-6/CML444//ZM521B-66-4-1-1-1-BB]-3-2-1-B-B-B                    | 514 | NP   | 2   | 40.33 | 42.13 | 4.90  | 2.14 | 0.42 | 0.13 | 1.04 | 0.56 |
| 12JY0040 | 18-599                                                                          | 515 | NP   | 2   | 60.16 | 25.97 | 6.19  | 1.21 | 0.55 | 0.13 | 0.43 | 0.68 |
| 12JY0041 | 18-599(RED)                                                                     | 516 | NP   | 2   | 46.64 | 37.55 | 6.27  | 1.07 | 0.48 | 0.07 | 0.81 | 0.55 |
| 12JY0108 | CML330                                                                          | 517 | NP   | 2   | 45.49 | 65.97 | 7.59  | 2.24 | 0.69 | 0.19 | 1.45 | 0.88 |
| 12JY0122 | CML418                                                                          | 518 | NP   | 2   | 46.83 | 43.30 | 6.89  | 1.47 | 0.63 | 0.12 | 0.92 | 0.75 |
| 12JY0146 | CML504                                                                          | 519 | NP   | 2   | 45.16 | 45.97 | 5.01  | 1.11 | 0.46 | 0.11 | 1.02 | 0.57 |
| 12JY0156 | Cuba/Guad C3 F53-3-1-1-B-B-B                                                    | 520 | NP   | 2   | 55.16 | 37.30 | 7.86  | 2.44 | 0.81 | 0.13 | 0.68 | 0.94 |
| 12JY0164 | ECA-MOROSR( BC1)F2-7-ECAVEE7/PL15QPMC7SRC1F2//POOL15QPMSR-B-4-B-B               | 521 | NP   | 2   | 46.16 | 31.97 | 8.21  | 2.86 | 0.49 | 0.14 | 0.69 | 0.63 |
| 12JY0167 | INTA-191-2-1-2-B*8-B-B-B                                                        | 522 | NP   | 2   | 47.49 | 42.97 | 6.43  | 1.88 | 0.47 | 0.08 | 0.90 | 0.55 |
| 12JY0173 | La Posta Seq C7-F86-1-1-1-1-B-B-B                                               | 523 | NP   | 2   | 36.16 | 34.63 | 2.81  | 1.17 | 0.25 | 0.08 | 0.96 | 0.33 |
| 12JY0185 | P501SRc0-F2-47-3-1-1-B-B-B-B                                                    | 524 | NP   | 2   | 37.16 | 45.30 | 2.05  | 1.00 | 0.31 | 0.06 | 1.22 | 0.37 |
| 12JY0208 | VL05610                                                                         | 525 | NP   | 2   | 55.83 | 29.13 | 4.40  | 1.75 | 0.55 | 0.13 | 0.52 | 0.68 |
| 12JY0226 | 178                                                                             | 526 | NP   | 2   | 34.83 | 19.97 | 2.65  | 1.42 | 0.36 | 0.09 | 0.57 | 0.45 |
| 12JY0228 | 273                                                                             | 527 | NP   | 2   | 58.12 | 45.84 | 10.97 | 2.64 | 0.62 | 0.18 | 0.79 | 0.79 |



| Seed ID  | Acc       | Gen | trt. | rep | SL    | RL    | SFW   | RFW  | SDW  | RDW  | RSR  | TDM  |
|----------|-----------|-----|------|-----|-------|-------|-------|------|------|------|------|------|
| 12JY0229 | 288       | 528 | NP   | 2   | 50.83 | 31.63 | 7.16  | 2.23 | 0.58 | 0.13 | 0.62 | 0.71 |
| 12JY0240 | 764       | 529 | NP   | 2   | 49.33 | 44.30 | 11.30 | 2.89 | 0.69 | 0.16 | 0.90 | 0.85 |
| 12JY0246 | 6103      | 530 | NP   | 2   | 55.49 | 50.97 | 10.47 | 3.38 | 0.54 | 0.16 | 0.92 | 0.70 |
| 12JY0252 | 81565     | 531 | NP   | 2   | 57.33 | 39.13 | 9.00  | 2.85 | 0.64 | 0.14 | 0.68 | 0.78 |
| 12JY0264 | 634-11511 | 532 | NP   | 2   | 53.49 | 43.63 | 9.30  | 1.92 | 0.78 | 0.14 | 0.82 | 0.92 |
| 12JY0265 | 698-1     | 533 | NP   | 2   | 45.49 | 42.63 | 7.48  | 1.68 | 0.53 | 0.09 | 0.94 | 0.62 |
| 12JY0308 | FAPW      | 534 | NP   | 2   | 66.49 | 42.80 | 16.98 | 3.66 | 1.14 | 0.30 | 0.64 | 1.44 |
| 12JY0322 | LH132     | 535 | NP   | 2   | 57.16 | 39.80 | 12.49 | 2.64 | 0.71 | 0.24 | 0.70 | 0.95 |
| 12JY0323 | LH51      | 536 | NP   | 2   | 48.66 | 30.63 | 9.92  | 2.60 | 0.48 | 0.17 | 0.63 | 0.65 |
| 12JY0325 | LX9801    | 537 | NP   | 2   | 54.66 | 35.13 | 7.65  | 1.94 | 0.52 | 0.15 | 0.64 | 0.66 |
| 12JY0329 | Mo17      | 538 | NP   | 2   | 54.16 | 27.47 | 14.19 | 2.63 | 0.54 | 0.19 | 0.51 | 0.72 |
| 12JY0347 | R08       | 539 | NP   | 2   | 59.16 | 33.13 | 8.15  | 2.26 | 0.51 | 0.16 | 0.56 | 0.67 |
| 12JY0349 | RP125     | 540 | NP   | 2   | 52.16 | 49.55 | 14.39 | 3.31 | 1.00 | 0.21 | 0.95 | 1.22 |
| 12JY0365 | Zhao835   | 541 | NP   | 2   | 51.49 | 31.47 | 15.36 | 4.21 | 0.72 | 0.32 | 0.61 | 1.03 |
| 12JY0370 | 昌7-2      | 542 | NP   | 2   | 55.91 | 50.97 | 13.72 | 3.26 | 0.86 | 0.22 | 0.91 | 1.07 |
| 12JY0383 | 丹598      | 543 | NP   | 2   | 54.99 | 29.72 | 10.77 | 2.83 | 0.84 | 0.24 | 0.54 | 1.08 |
| 12JY0401 | 黄早四       | 544 | NP   | 2   | 46.41 | 43.97 | 9.81  | 2.49 | 0.64 | 0.17 | 0.95 | 0.81 |
| 12JY0416 | 吉853      | 545 | NP   | 2   | 57.83 | 47.47 | 13.15 | 3.34 | 0.60 | 0.22 | 0.82 | 0.82 |
| 12JY0443 | 南21-3     | 546 | NP   | 2   | 64.91 | 49.30 | 15.54 | 4.08 | 1.06 | 0.32 | 0.76 | 1.38 |
| 12JY0450 | 齐319      | 547 | NP   | 2   | 54.20 | 41.51 | 9.74  | 2.55 | 0.54 | 0.19 | 0.77 | 0.73 |
| 12JY0457 | 沈5003     | 548 | NP   | 2   | 46.16 | 49.13 | 6.82  | 2.10 | 0.39 | 0.16 | 1.06 | 0.55 |
| 12JY0462 | 四287      | 549 | NP   | 2   | 54.91 | 43.55 | 12.13 | 3.21 | 0.74 | 0.18 | 0.79 | 0.92 |
| 12JY0473 | 铁7922     | 550 | NP   | 2   | 54.49 | 32.47 | 12.58 | 2.61 | 0.67 | 0.19 | 0.60 | 0.85 |
